# Supplementary material for: How Deep Can the Endophytic Mycobiome Go? A Case Study on Six Woody Species from the Brazilian Cerrado
Source: MDPI journal article supplement (doi:10.3390/jof9050508), 2023-04-25
Supplement: s1 [file s1]

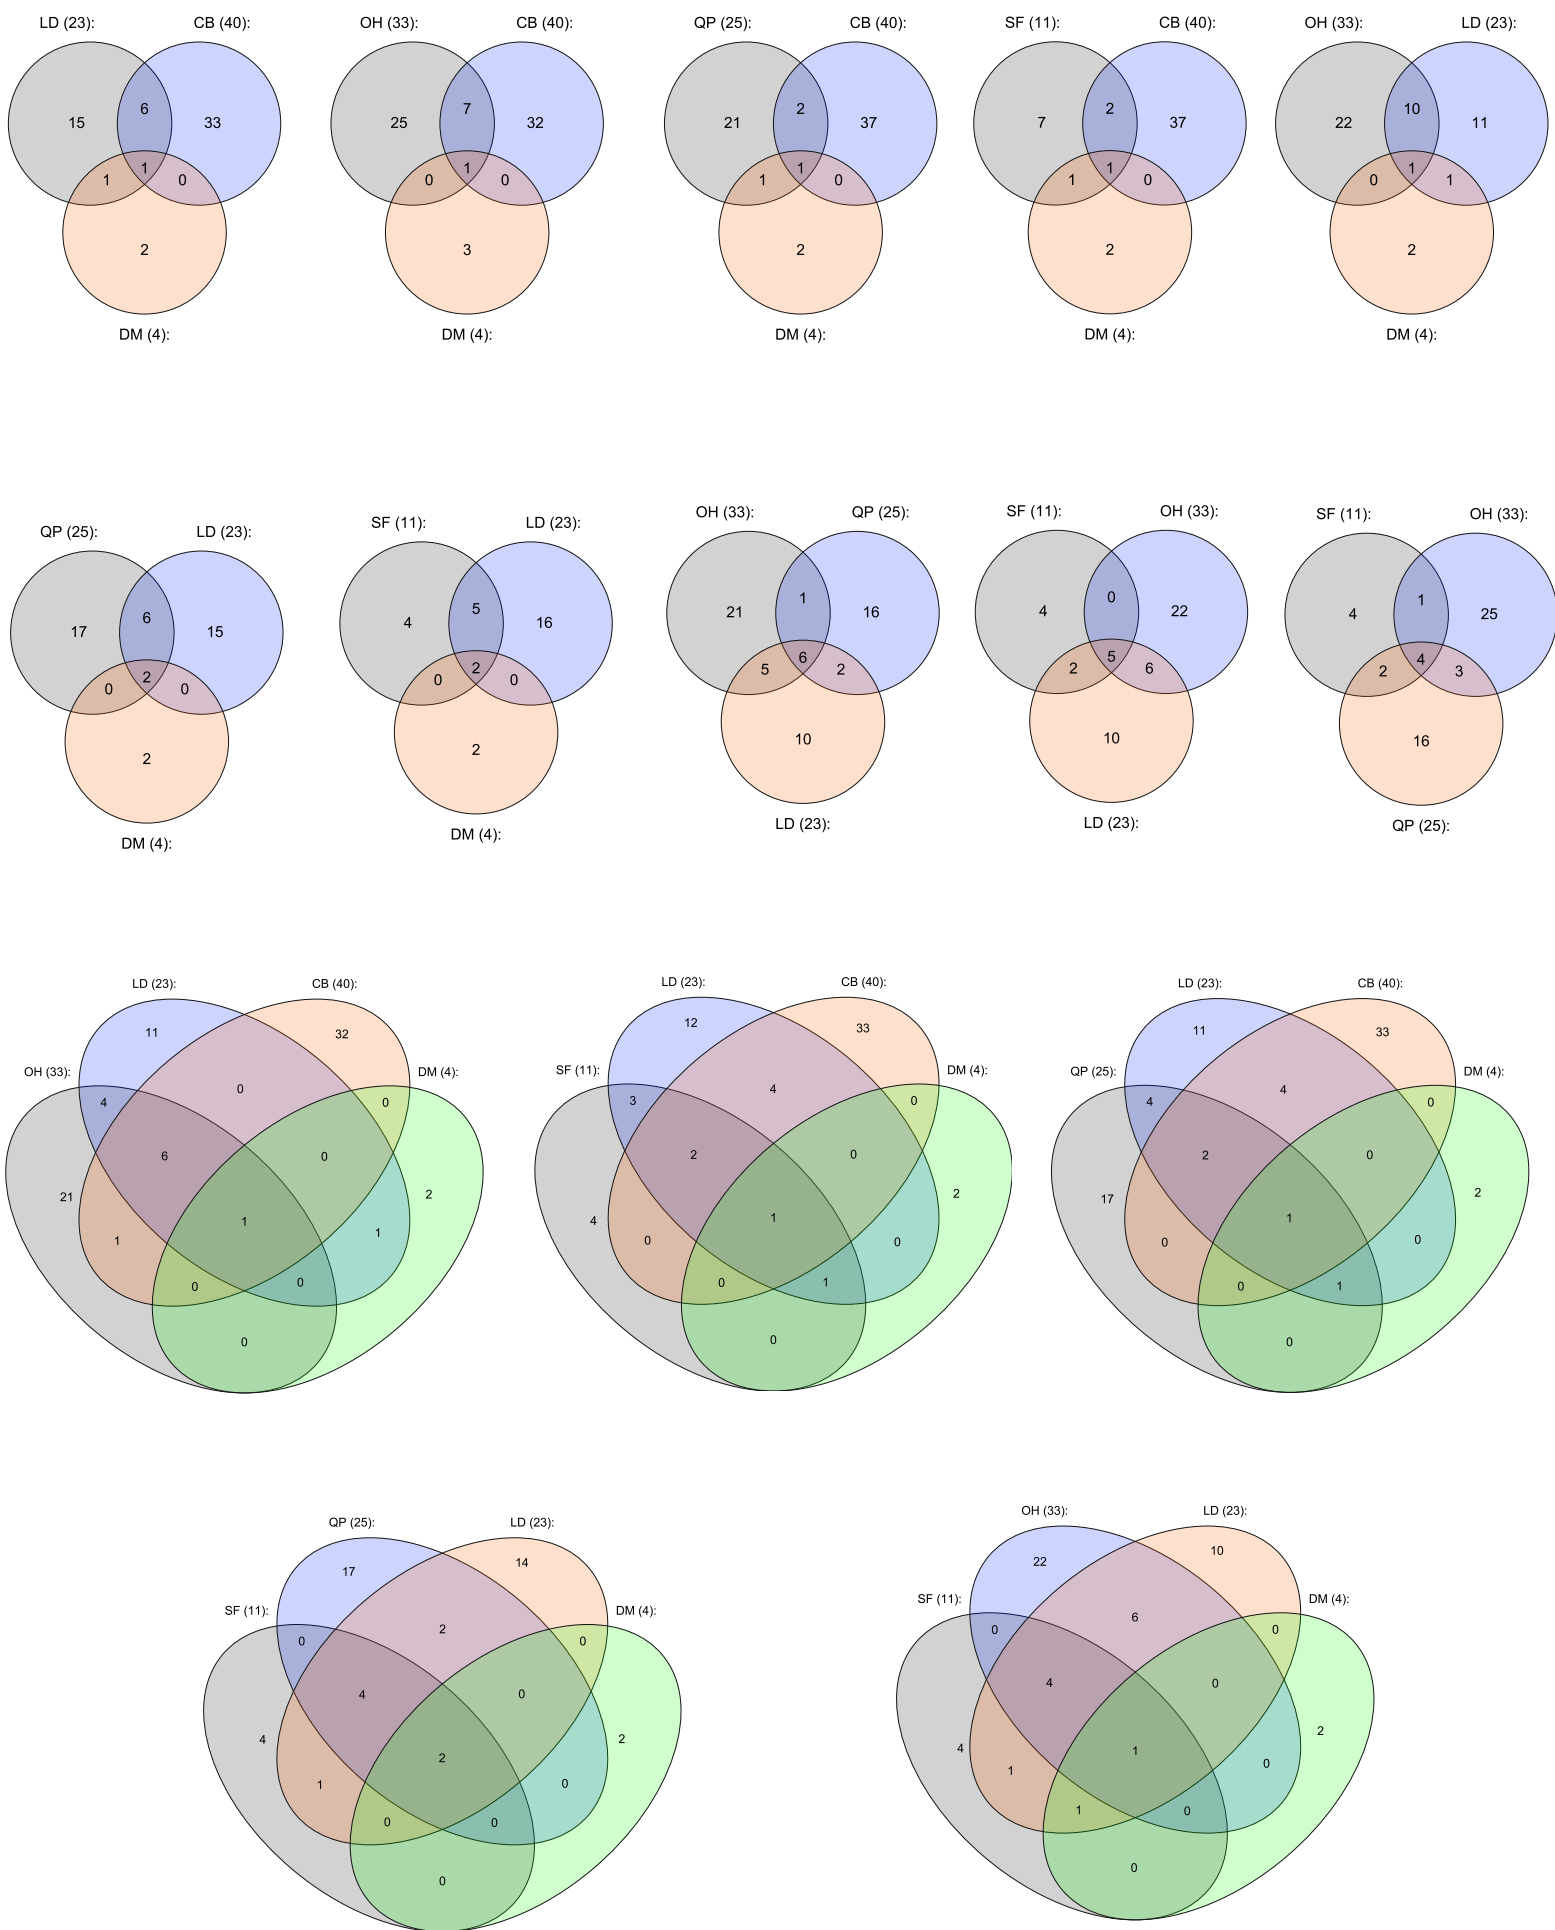

Figure S3. Venn diagram showing the number of most abundant fungal OTUs (>1000 reads) shared among the six host plant species.
