# Supplementary material for: How Deep Can the Endophytic Mycobiome Go? A Case Study on Six Woody Species from the Brazilian Cerrado
Source: MDPI journal article supplement (doi:10.3390/jof9050508), 2023-04-25
Supplement: s1 [file s1]

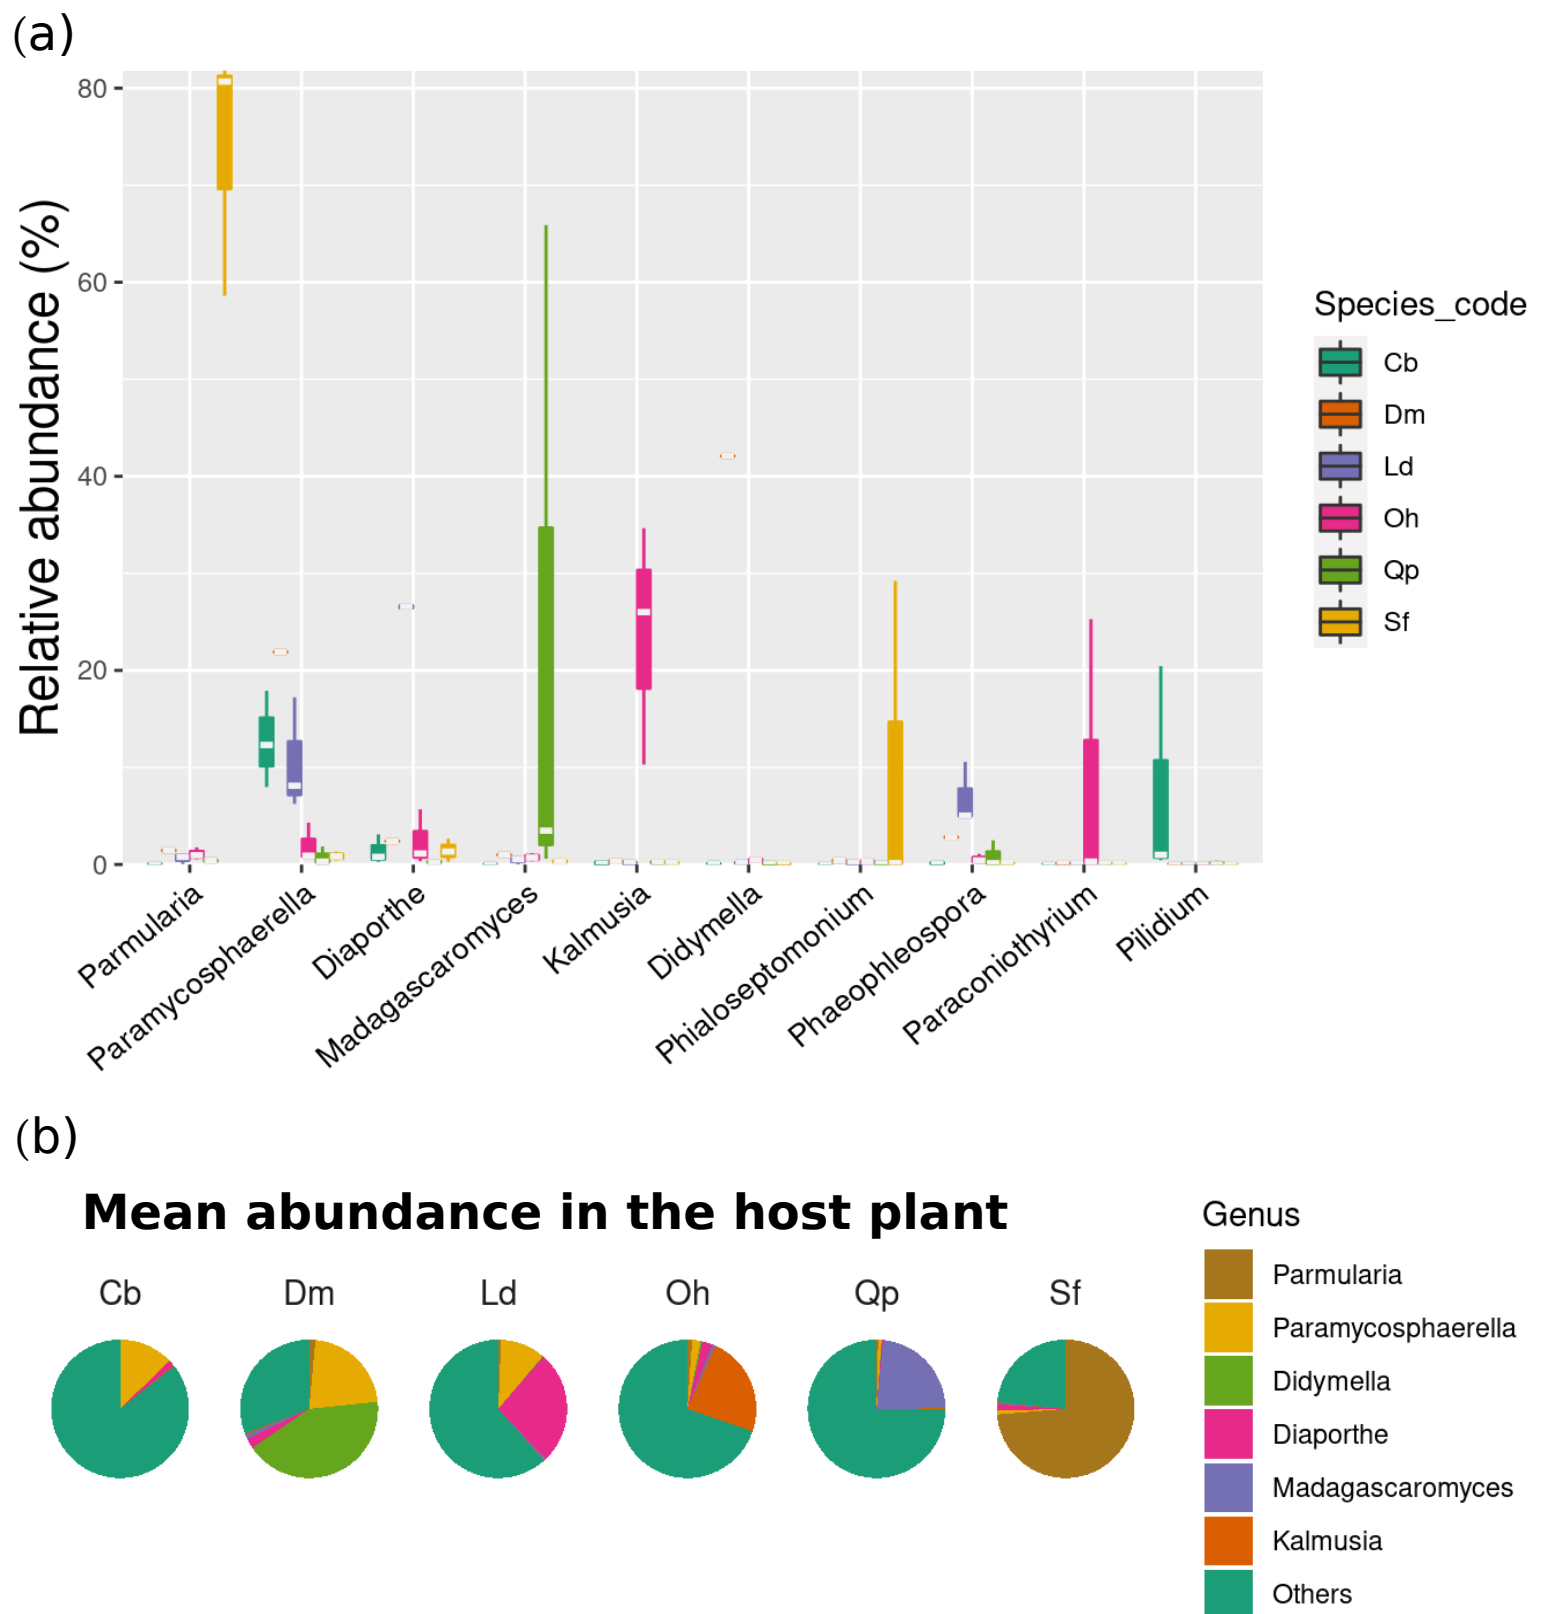

Figure S1. Taxonomic composition of the leaf endophytic fungal community from six host plant species at the genus level.
