# Supplementary material for: How Deep Can the Endophytic Mycobiome Go? A Case Study on Six Woody Species from the Brazilian Cerrado
Source: MDPI journal article supplement (doi:10.3390/jof9050508), 2023-04-25
Supplement: s1 [file s1]

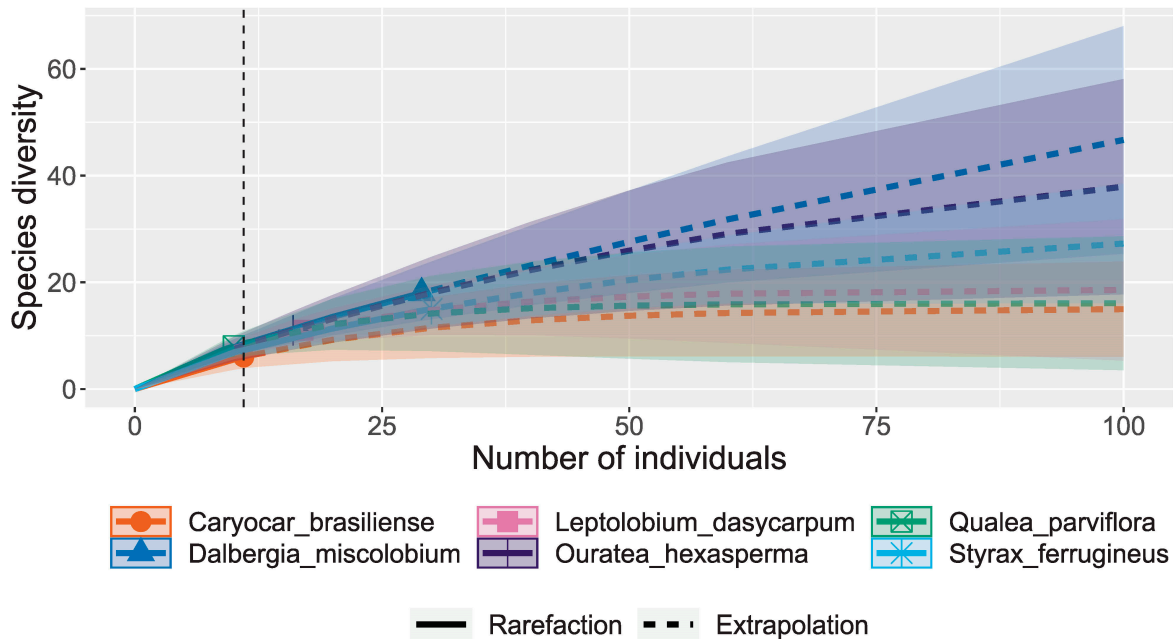

Figure S4. Rarefaction and extrapolation sampling curves based on sample size applied to estimate the cultivable foliar endophytic fungal community associated with six native Cerrado woody species.
