# Supplementary material for: How Deep Can the Endophytic Mycobiome Go? A Case Study on Six Woody Species from the Brazilian Cerrado
Source: MDPI journal article supplement (doi:10.3390/jof9050508), 2023-04-25
Supplement: s1 [file s1]

Table S1. Taxonomic assignment of OTUs.

| Phylum    | Class      | Order             | Family             | Genus                 | Species | CB1629C | CB1765C | CB996C | DM18  |
|-----------|------------|-------------------|--------------------|-----------------------|---------|---------|---------|--------|-------|
| Ascomycot | Dothideor  | Asterinales       | Parmularia         | Parmularia            |         | 0       | 69      | 0      | 297   |
| Ascomycot | Dothideor  | Capnodiale        | Mycospha           | Paramycosphaerella    |         | 8318    | 12268   | 20159  | 7260  |
| Ascomycot | Dothideor  | Pleosporal        | Didymospl          | Kalmusia              |         | 51      | 493     | 119    | 124   |
| Ascomycot | Dothideor  | Capnodiales       |                    |                       |         | 53      | 34      | 3124   | 80    |
| Ascomycot | Sordariom  | Diaporthal        | Diaporthac         | Diaporthe             |         | 82      | 733     | 38     | 109   |
| Ascomycot | Sordariom  | Hypocreale        | Nectriacea         | Phialoseptomonium     |         | 0       | 8       | 0      | 142   |
| Ascomycot | Dothideor  | Capnodiale        | Mycospha           | Madagascaromyces      |         | 0       | 0       | 0      | 154   |
| Ascomycot | Dothideor  | Capnodiale        | Mycospha           | Madagascaromyces      |         | 0       | 0       | 0      | 102   |
| Ascomycot | Sordariom  | Diaporthal        | Lamproconiaceae    |                       |         | 0       | 0       | 0      | 61    |
| Ascomycot | Sordariom  | Diaporthal        | Diaporthac         | Diaporthe             |         | 166     | 1024    | 136    | 245   |
| Ascomycot | Dothideor  | Capnodiale        | Mycospha           | Phaeophleospora       |         | 113     | 247     | 109    | 891   |
| Ascomycot | Dothideor  | Pleosporal        | Didymospl          | Paraconiothyrium      |         | 0       | 0       | 0      | 36    |
| Ascomycot | Leotiomyce | Helotiales        | Chaetomel          | Pilidium              |         | 906     | 466     | 24675  | 0     |
| Ascomycot | Eurotiomy  | Eurotiales        | Aspergillaceae     |                       |         | 0       | 46      | 19     | 1882  |
| Ascomycot | Leotiomyce | Helotiales        | Pezizellace        | Porodiplod livistonae |         | 0       | 0       | 0      | 66    |
| Ascomycot | Dothideor  | Capnodiale        | Mycospha           | Madagascaromyces      |         | 0       | 0       | 0      | 101   |
| Ascomycot | Dothideor  | Pleosporal        | Didymellac         | Didymella             |         | 128     | 48      | 0      | 15059 |
| Ascomycot | Dothideor  | Capnodiale        | Mycospha           | Xenosonderhenia       |         | 0       | 17      | 0      | 76    |
| Ascomycot | Sordariom  | Xylariales        | Sporocada          | Neopestalotiopsis     |         | 852     | 503     | 1218   | 140   |
| Ascomycot | Dothideor  | Pleosporal        | Pleosporac         | Alternaria            |         | 222     | 1172    | 130    | 67    |
| Ascomycot | Sordariom  | Diaporthal        | Diaporthac         | Diaporthe             |         | 185     | 181     | 18     | 26    |
| Ascomycot | Dothideor  | Capnodiale        | Teratosphz         | Pseudoteratosphaeria  |         | 1532    | 2274    | 887    | 385   |
| Ascomycot | Dothideor  | Capnodiale        | Cladospori         | Cladosporium          |         | 405     | 744     | 566    | 154   |
| Ascomycot | Dothideor  | Pleosporal        | Didymellac         | Epicoccum             |         | 0       | 0       | 0      | 0     |
| Ascomycot | Dothideor  | Capnodiale        | Mycosphaerellaceae |                       |         | 0       | 0       | 0      | 70    |
| Ascomycot | Dothideor  | Capnodiale        | Mycospha           | Pseudocercospora      |         | 0       | 0       | 0      | 0     |
| Ascomycot | Eurotiomy  | Chaetothy         | Chaetothy          | Strelitziana          |         | 0       | 83      | 0      | 24    |
| Ascomycot | Dothideor  | Capnodiale        | Mycospha           | Pseudocercospora      |         | 22      | 0       | 39     | 38    |
| Ascomycot | Dothideor  | Capnodiale        | Mycospha           | Paramycosphaerella    |         | 965     | 763     | 1075   | 440   |
| Ascomycot | Dothideor  | Capnodiale        | Mycospha           | Phaeophleospora       |         | 0       | 0       | 0      | 113   |
| Ascomycot | Sordariom  | Diaporthal        | Diaporthac         | Diaporthe             |         | 0       | 0       | 0      | 0     |
| Ascomycot | Dothideor  | Capnodiale        | Mycospha           | Stomiopeltis          |         | 140     | 727     | 3606   | 0     |
| Ascomycot | Eurotiomy  | Eurotiales        | Aspergillac        | Aspergillus           |         | 0       | 0       | 0      | 14    |
| Ascomycot | Dothideor  | Pleosporal        | Didymellac         | Epicoccum             |         | 0       | 0       | 0      | 0     |
| Ascomycot | Dothideor  | Pleosporales      |                    |                       |         | 0       | 0       | 0      | 38    |
| Ascomycot | Sordariom  | Diaporthal        | Diaporthac         | Diaporthe             |         | 16      | 397     | 0      | 0     |
| Ascomycot | Eurotiomy  | Onygenale         | Onygenale          | Zeloasperisporium     |         | 0       | 0       | 201    | 29    |
| Ascomycot | Dothideor  | Asterinales       | Parmularia         | Parmularia            |         | 0       | 0       | 0      | 219   |
| Ascomycot | Sordariom  | Diaporthal        | Diaporthac         | Diaporthe             |         | 0       | 344     | 0      | 0     |
| Ascomycot | Dothideor  | Capnodiale        | Teratosphz         | Pseudoteratosphaeria  |         | 384     | 274     | 614    | 303   |
| Ascomycot | Dothideor  | Capnodiale        | Teratosphz         | Neophaeothecoidea     |         | 446     | 281     | 2243   | 166   |
| Ascomycot | Sordariom  | Chaetosphaeriales |                    |                       |         | 0       | 13      | 0      | 35    |
| Ascomycot | Sordariom  | Diaporthal        | Diaporthac         | Diaporthe             |         | 0       | 68      | 0      | 24    |
| Ascomycot | Sordariom  | Chaetosph         | Chaetosph          | Dendrophoma           |         | 0       | 16      | 0      | 78    |
| Ascomycot | Sordariom  | Trichospha        | Trichospha         | Nigrospora            |         | 0       | 0       | 58     | 0     |
| Ascomycot | Sordariom  | Xylariales        | Sporocada          | Pestalotiopsis        |         | 145     | 97      | 252    | 26    |
| Ascomycot | Dothideor  | Capnodiale        | Mycospha           | Phaeophleospora       |         | 0       | 0       | 0      | 0     |
| Ascomycot | Sordariom  | Trichospha        | Trichospha         | Nigrospora            |         | 256     | 176     | 139    | 0     |

|                                                                                                     |     |     |      |     |
|-----------------------------------------------------------------------------------------------------|-----|-----|------|-----|
| Ascomycot Sordariom <sup>1</sup> Diaporthal <sup>1</sup> Diaporthaceae                              | 0   | 128 | 0    | 22  |
| Ascomycot Dothideom <sup>1</sup> Capnodiale Mycosphaerellaceae                                      | 0   | 0   | 0    | 18  |
| Ascomycot Dothideom <sup>1</sup> Capnodiale Mycospha <sup>1</sup> Zasmidium                         | 110 | 211 | 123  | 85  |
| Ascomycot Dothideom <sup>1</sup> Capnodiale Mycospha <sup>1</sup> Zasmidium                         | 152 | 173 | 130  | 85  |
| Ascomycot Sordariom <sup>1</sup> Diaporthal <sup>1</sup> Diaporthac <sup>1</sup> Diaporthe          | 58  | 91  | 53   | 0   |
| Ascomycot Dothideom <sup>1</sup> Capnodiale Mycospha <sup>1</sup> Pseudocerc <sup>1</sup> neriicola | 0   | 13  | 0    | 0   |
| Ascomycot Sordariom <sup>1</sup> Diaporthal <sup>1</sup> Diaporthac <sup>1</sup> Diaporthe          | 14  | 42  | 0    | 0   |
| Ascomycot Dothideom <sup>1</sup> Capnodiale Mycospha <sup>1</sup> Paramycosphaerella                | 0   | 0   | 0    | 0   |
| Ascomycot Sordariom <sup>1</sup> Diaporthal <sup>1</sup> Diaporthac <sup>1</sup> Diaporthe          | 0   | 122 | 0    | 0   |
| Ascomycot Dothideom <sup>1</sup> Botryospha <sup>1</sup> Botryospha <sup>1</sup> Lasiodiplodia      | 0   | 0   | 0    | 16  |
| Ascomycot Sordariomycetes                                                                           | 0   | 10  | 0    | 0   |
| Ascomycot Dothideom <sup>1</sup> Capnodiale Mycospha <sup>1</sup> Geastrumia                        | 121 | 248 | 1565 | 0   |
| Ascomycot Dothideom <sup>1</sup> Capnodiales                                                        | 41  | 133 | 142  | 88  |
| Ascomycot Sordariom <sup>1</sup> Chaetospha <sup>1</sup> Chaetospha <sup>1</sup> Dictyochaeta       | 0   | 0   | 0    | 10  |
| Ascomycot Dothideom <sup>1</sup> Capnodiale Teratospha <sup>1</sup> Neophaeotheckoidea              | 685 | 56  | 827  | 249 |
| Ascomycot Sordariom <sup>1</sup> Diaporthal <sup>1</sup> Diaporthac <sup>1</sup> Diaporthe          | 0   | 0   | 0    | 0   |
| Ascomycot Sordariom <sup>1</sup> Diaporthal <sup>1</sup> Diaporthac <sup>1</sup> Diaporthe          | 95  | 0   | 0    | 0   |
| Ascomycot Sordariom <sup>1</sup> Diaporthal <sup>1</sup> Diaporthac <sup>1</sup> Diaporthe          | 0   | 0   | 0    | 54  |
| Ascomycot Dothideom <sup>1</sup> Capnodiale Cladospori <sup>1</sup> Cladosporium                    | 0   | 18  | 0    | 10  |
| Ascomycot Dothideom <sup>1</sup> Capnodiale Mycospha <sup>1</sup> Xenosonderhenia                   | 0   | 0   | 0    | 0   |
| Ascomycot Dothideom <sup>1</sup> Pleosporales                                                       | 28  | 118 | 41   | 0   |
| Ascomycot Dothideom <sup>1</sup> Capnodiale Mycospha <sup>1</sup> Geastrumia                        | 90  | 965 | 448  | 0   |
| Ascomycot Sordariom <sup>1</sup> Diaporthal <sup>1</sup> Diaporthac <sup>1</sup> Diaporthe          | 90  | 85  | 0    | 0   |
| Ascomycot Dothideom <sup>1</sup> Capnodiale Mycosphaerellaceae                                      | 106 | 82  | 288  | 41  |
| Ascomycot Sordariom <sup>1</sup> Diaporthal <sup>1</sup> Diaporthac <sup>1</sup> Diaporthe          | 0   | 0   | 0    | 0   |
| Ascomycot Dothideom <sup>1</sup> Pleosporales                                                       | 0   | 23  | 27   | 0   |
| Ascomycot Dothideom <sup>1</sup> Capnodiale Mycospha <sup>1</sup> Neoceratosperma                   | 0   | 0   | 0    | 44  |
| Ascomycot Sordariom <sup>1</sup> Diaporthal <sup>1</sup> Diaporthac <sup>1</sup> Diaporthe          | 29  | 0   | 0    | 0   |
| Ascomycot Dothideom <sup>1</sup> Dothideom <sup>1</sup> Dothideom <sup>1</sup> Radulidium           | 431 | 668 | 67   | 0   |
| Ascomycot Dothideom <sup>1</sup> Capnodiale Mycosphaerellaceae                                      | 0   | 6   | 0    | 0   |
| Ascomycot Eurotiomy <sup>1</sup> Onygenale Onygenale Zeloasperisporium                              | 0   | 0   | 0    | 6   |
| Ascomycot Sordariom <sup>1</sup> Trichospha <sup>1</sup> Trichospha <sup>1</sup> Nigrospora         | 193 | 0   | 57   | 41  |
| Ascomycot Sordariom <sup>1</sup> Chaetospha <sup>1</sup> Chaetosphaeriaceae                         | 0   | 326 | 121  | 6   |
| Ascomycot Dothideom <sup>1</sup> Capnodiale Teratospha <sup>1</sup> Neophaeotheckoidea              | 136 | 85  | 1031 | 0   |
| Ascomycot Dothideom <sup>1</sup> Capnodiale Mycospha <sup>1</sup> Septoria                          | 104 | 169 | 197  | 35  |
| Ascomycot Dothideom <sup>1</sup> Capnodiale Cladospori <sup>1</sup> Cladosporium                    | 0   | 0   | 0    | 0   |
| Ascomycot Sordariom <sup>1</sup> Hypocreale Nectriaceae Gibberella                                  | 153 | 119 | 59   | 31  |
| Ascomycot Sordariom <sup>1</sup> Diaporthal <sup>1</sup> Diaporthac <sup>1</sup> Diaporthe          | 0   | 0   | 0    | 0   |
| Ascomycot Sordariom <sup>1</sup> Hypocreale Nectriaceae Gibberella                                  | 592 | 266 | 350  | 0   |
| Ascomycot Dothideom <sup>1</sup> Pleosporal <sup>1</sup> Didymellac <sup>1</sup> Neodidymella       | 0   | 0   | 0    | 37  |
| Ascomycot Sordariom <sup>1</sup> Chaetosphaeriales                                                  | 0   | 0   | 0    | 0   |
| Ascomycot Dothideomycetes                                                                           | 22  | 79  | 1056 | 0   |
| Ascomycot Dothideom <sup>1</sup> Capnodiale Mycospha <sup>1</sup> Stomiopeltis                      | 24  | 0   | 1131 | 0   |
| Ascomycot Dothideom <sup>1</sup> Botryospha <sup>1</sup> Phyllostict <sup>1</sup> Phyllosticta      | 0   | 0   | 0    | 223 |
| Ascomycot Dothideom <sup>1</sup> Pleosporal <sup>1</sup> Didymellac <sup>1</sup> Epicoccum          | 42  | 379 | 40   | 32  |
| Ascomycot Dothideom <sup>1</sup> Pleosporal <sup>1</sup> Didymellaceae                              | 0   | 0   | 0    | 0   |
| Ascomycot Dothideom <sup>1</sup> Capnodiale Teratospha <sup>1</sup> Pseudoteratosphaeria            | 354 | 80  | 197  | 97  |
| Ascomycot Dothideom <sup>1</sup> Capnodiale Mycospha <sup>1</sup> Madagascarymyces                  | 0   | 0   | 0    | 0   |
| Ascomycot Sordariom <sup>1</sup> Diaporthal <sup>1</sup> Diaporthac <sup>1</sup> Diaporthe          | 23  | 30  | 16   | 0   |
| Ascomycot Dothideom <sup>1</sup> Capnodiale Teratosphaeriaceae                                      | 285 | 67  | 571  | 10  |

|                           |                 |                    |                      |     |     |     |     |
|---------------------------|-----------------|--------------------|----------------------|-----|-----|-----|-----|
| Ascomycot Sordariom       | Sordariales     | Chaetomia          | Botryotrichum        | 489 | 183 | 302 | 0   |
| Ascomycot Dothideom       | Capnodiales     | Mycospha           | Pseudocercospora     | 0   | 0   | 0   | 0   |
| Ascomycot Sordariom       | Trichospha      | Trichospha         | Nigrospora           | 0   | 0   | 0   | 0   |
| Ascomycot Dothideom       | Capnodiales     | Mycospha           | Paramycosphaerella   | 0   | 0   | 0   | 0   |
| Ascomycot Dothideomycetes |                 |                    |                      | 30  | 154 | 719 | 0   |
| Ascomycot Dothideom       | Capnodiales     | Teratosph          | Pseudoteratosphaeria | 92  | 165 | 439 | 62  |
| Ascomycot Dothideom       | Pleosporal      | Teichospor         | Teichospora          | 570 | 0   | 8   | 286 |
| Ascomycot Sordariom       | Diaporthal      | Diaporthac         | Diaporthe sackstonii | 26  | 0   | 0   | 0   |
| Ascomycot Sordariom       | Xylariales      | Xylariales_        | Liberomyces          | 9   | 795 | 11  | 0   |
| Ascomycot Sordariom       | Diaporthal      | Diaporthac         | Diaporthe            | 0   | 0   | 0   | 0   |
| Ascomycot Sordariom       | Glomerella      | Plectospha         | Paragibbellulopsis   | 265 | 177 | 376 | 0   |
| Ascomycot Sordariom       | Chaetosph       | Chaetosphaeriaceae |                      | 0   | 0   | 0   | 0   |
| Ascomycot Dothideom       | Capnodiales     | Mycospha           | Stomiopeltis         | 0   | 0   | 803 | 0   |
| Ascomycot Dothideom       | Botryosph       | Phyllostict        | Phyllosticta         | 0   | 0   | 0   | 67  |
| Ascomycot Dothideom       | Pleosporal      | Didymosp           | Paracamarosporium    | 0   | 0   | 0   | 0   |
| Ascomycot Dothideom       | Pleosporal      | Pleosporac         | Alternaria           | 0   | 0   | 0   | 0   |
| Ascomycot Sordariom       | Diaporthal      | Diaporthac         | Diaporthe            | 0   | 0   | 0   | 0   |
| Ascomycot Sordariom       | Diaporthal      | Diaporthac         | Diaporthe            | 0   | 0   | 0   | 0   |
| Ascomycot Dothideom       | Pleosporal      | Didymellac         | Epicoccum            | 0   | 0   | 13  | 0   |
| Ascomycot Dothideom       | Dothideale      | Aureobasic         | Aureobasidium        | 17  | 0   | 14  | 0   |
| Ascomycot Dothideom       | Dothideale      | Aureobasic         | Aureobasidium        | 0   | 0   | 0   | 0   |
| Ascomycot Sordariom       | Diaporthal      | Diaporthaceae      |                      | 0   | 0   | 0   | 0   |
| Ascomycot Pezizomyc       | Pezizales       | Pyronemat          | Pseudombrophila      | 355 | 172 | 180 | 0   |
| Ascomycot Sordariom       | Diaporthal      | Diaporthac         | Diaporthe            | 0   | 0   | 0   | 0   |
| Ascomycot Dothideom       | Botryosph       | Phyllostict        | Phyllosticta         | 5   | 5   | 6   | 18  |
| Ascomycot Eurotiomy       | Chaetothyriales |                    |                      | 15  | 0   | 680 | 0   |
| Ascomycot Dothideomycetes |                 |                    |                      | 0   | 0   | 0   | 0   |
| Ascomycot Sordariom       | Hypocreale      | Nectriaceae        | Gibberella           | 0   | 0   | 0   | 14  |
| Ascomycot Dothideom       | Pleosporal      | Pleosporac         | Bipolaris            | 0   | 0   | 0   | 0   |
| Ascomycot Sordariom       | Xylariales      | Sporocada          | Pestalotiopsis       | 94  | 63  | 42  | 0   |
| Ascomycot Sordariom       | Trichospha      | Trichospha         | Nigrospora           | 0   | 668 | 0   | 0   |
| Ascomycot Leotiomy        | Helotiales      | Hyaloscyph         | Proliferodiscus      | 81  | 284 | 16  | 0   |
| Ascomycot Eurotiomy       | Onygenale       | Onygenale          | Zeloasperisporium    | 0   | 0   | 0   | 33  |
| Ascomycot Sordariom       | Glomerella      | Glomerella         | Colletotrichum       | 0   | 76  | 0   | 10  |
| Ascomycot Dothideom       | Capnodiales     |                    |                      | 0   | 0   | 0   | 0   |
| Ascomycot Sordariom       | Glomerella      | Plectospha         | Plectosphaerella     | 149 | 45  | 78  | 0   |
| Ascomycot Dothideom       | Capnodiales     |                    |                      | 0   | 43  | 340 | 0   |
| Ascomycot Dothideom       | Pleosporal      | Didymosp           | Xenocamarosporium    | 0   | 0   | 29  | 0   |
| Ascomycot Sordariom       | Diaporthal      | Valsaceae          | Cytospora            | 0   | 0   | 0   | 0   |
| Ascomycot Sordariom       | Hypocreale      | Nectriaceae        | Phialoseptomonium    | 0   | 0   | 0   | 0   |
| Ascomycot Dothideom       | Capnodiales     | Mycospha           | Zasmidium            | 0   | 0   | 0   | 0   |
| Ascomycot Dothideom       | Capnodiales     | Teratosph          | Neophaeothecoidea    | 0   | 0   | 187 | 203 |
| Ascomycot Sordariom       | Diaporthal      | Diaporthac         | Diaporthe            | 0   | 0   | 0   | 0   |
| Ascomycot Dothideom       | Capnodiales     | Teratosph          | Pseudoteratosphaeria | 0   | 0   | 0   | 0   |
| Ascomycot Sordariom       | Diaporthal      | Diaporthac         | Diaporthe            | 29  | 0   | 0   | 0   |
| Ascomycot Dothideom       | Pleosporal      | Phaeospha          | Neosulcatispora      | 22  | 0   | 17  | 13  |
| Ascomycot Sordariom       | Diaporthal      | Diaporthac         | Diaporthe            | 0   | 0   | 0   | 8   |
| Ascomycot Sordariom       | Glomerella      | Glomerella         | Colletotrichum       | 36  | 68  | 0   | 0   |
| Ascomycot Eurotiomy       | Chaetothyriales |                    |                      | 0   | 0   | 556 | 0   |
| Ascomycot Sordariom       | Sordariales     | Chaetomia          | Humicola grisea      | 215 | 107 | 140 | 0   |

|                                                                              |     |     |     |     |
|------------------------------------------------------------------------------|-----|-----|-----|-----|
| Ascomycot Dothideomycetes Venturiales: Sympoviales: Neocoleroa               | 98  | 390 | 40  | 0   |
| Ascomycot Sordariomycetes Microascales Microascales Lophotrichus             | 41  | 29  | 0   | 0   |
| Ascomycot Sordariomycetes Microascales Microascales Gamsia                   | 260 | 181 | 101 | 0   |
| Ascomycot Sordariomycetes Hypocreales Nectriaceae Gibberella                 | 187 | 136 | 177 | 0   |
| Ascomycot Sordariomycetes Diaporthales Diaporthaceae Diaporthe               | 0   | 0   | 0   | 0   |
| Ascomycot Eurotiomycetes Phaeomoniaceae Phaeomonon Xenocylindrosporium       | 0   | 425 | 28  | 0   |
| Ascomycot Eurotiomycetes Phaeomoniaceae Phaeomonon Xenocylindrosporium       | 0   | 337 | 0   | 0   |
| Ascomycot Dothideomycetes Capnodiales Teratosphaeriales Pseudoteratosphaeria | 0   | 0   | 0   | 0   |
| Ascomycot Eurotiomycetes Phaeomoniellales                                    | 6   | 272 | 108 | 0   |
| Ascomycot Eurotiomycetes Eurotiales Aspergillaceae Aspergillus               | 45  | 0   | 0   | 6   |
| Ascomycot Sordariomycetes Chaetosphaeriales Chaetosphaeriaceae               | 65  | 425 | 0   | 0   |
| Ascomycot Sordariomycetes Diaporthales Diaporthaceae Diaporthe               | 0   | 0   | 0   | 0   |
| Ascomycot Dothideomycetes Capnodiales Teratosphaeriaceae                     | 0   | 0   | 0   | 8   |
| Ascomycot Sordariomycetes Hypocreales Ophiocordaceae Tolypocladium           | 0   | 0   | 0   | 0   |
| Ascomycot Dothideomycetes Capnodiales Mycosphaeraceae Exopassalora           | 0   | 0   | 432 | 0   |
| Ascomycot Dothideomycetes Capnodiales Mycosphaeraceae Stomiopeltis           | 31  | 214 | 229 | 0   |
| Ascomycot Dothideomycetes Pleosporales Didymosporales Paraconiothyrium       | 0   | 0   | 0   | 0   |
| Ascomycot Dothideomycetes Capnodiales Teratosphaeriales Pseudoteratosphaeria | 0   | 82  | 0   | 0   |
| Ascomycot Dothideomycetes Capnodiales Mycosphaerellaceae                     | 0   | 0   | 0   | 0   |
| Ascomycot Sordariomycetes Diaporthales Diaporthaceae Diaporthe               | 0   | 0   | 0   | 0   |
| Ascomycot Sordariomycetes Diaporthales Diaporthaceae Diaporthe               | 0   | 0   | 0   | 0   |
| Ascomycot Dothideomycetes Pleosporales Sporormiaceae Preussia                | 100 | 145 | 48  | 4   |
| Ascomycot Dothideomycetes Capnodiales Mycosphaerellaceae                     | 0   | 0   | 0   | 0   |
| Ascomycot Dothideomycetes Capnodiales Mycosphaerellaceae                     | 150 | 228 | 66  | 0   |
| Ascomycot Pezizomycetes Pezizales Pyrenopezizaceae Geopora                   | 0   | 0   | 0   | 0   |
| Ascomycot Dothideomycetes Capnodiales Mycosphaeraceae Madagascaromyces       | 0   | 0   | 0   | 0   |
| Ascomycot Dothideomycetes Capnodiales Teratosphaeriaceae                     | 293 | 0   | 0   | 0   |
| Ascomycot Dothideomycetes Pleosporales Didymellaceae                         | 0   | 0   | 0   | 0   |
| Ascomycot Dothideomycetes Pleosporales Didymellaceae Epicoccum               | 18  | 0   | 0   | 0   |
| Ascomycot Sordariomycetes Glomerellaceae Glomerella Colletotrichum           | 24  | 20  | 16  | 0   |
| Ascomycot Dothideomycetes Capnodiales Mycosphaerellaceae                     | 0   | 0   | 0   | 0   |
| Ascomycot Sordariomycetes Hypocreales Nectriaceae Dactylonectria             | 196 | 134 | 96  | 0   |
| Ascomycot Dothideomycetes Capnodiales Mycosphaeraceae Neoceratosperma        | 0   | 0   | 0   | 0   |
| Ascomycot Sordariomycetes Hypocreales Nectriaceae                            | 231 | 78  | 112 | 0   |
| Ascomycot Sordariomycetes                                                    | 0   | 0   | 0   | 184 |
| Ascomycot Dothideomycetes Pleosporales                                       | 0   | 0   | 0   | 0   |
| Ascomycot Sordariomycetes Diaporthales Diaporthaceae Diaporthe               | 0   | 0   | 0   | 0   |
| Ascomycot Dothideomycetes Capnodiales Mycosphaeraceae Zasmidium              | 98  | 275 | 0   | 0   |
| Ascomycot Dothideomycetes Pleosporales Massariaceae Helminthosporium         | 0   | 379 | 0   | 0   |
| Ascomycot Sordariomycetes Hypocreales Nectriaceae Lasionectria               | 204 | 100 | 92  | 0   |
| Ascomycot Sordariomycetes Diaporthales Diaporthaceae Diaporthe               | 0   | 0   | 0   | 0   |
| Ascomycot Sordariomycetes Hypocreales Nectriaceae Gibberella                 | 161 | 73  | 109 | 0   |
| Ascomycot Sordariomycetes Diaporthales Gnomoniaceae                          | 0   | 0   | 0   | 5   |
| Ascomycot Dothideomycetes Capnodiales Teratosphaeriales Neophaeothecoidea    | 130 | 63  | 184 | 0   |
| Ascomycot Sordariomycetes Diaporthales Diaporthaceae Diaporthe               | 0   | 0   | 0   | 377 |
| Ascomycot Dothideomycetes Pleosporales Pleosporaceae Bipolaris               | 0   | 0   | 0   | 0   |
| Ascomycot Sordariomycetes Hypocreales Nectriaceae Neonectria                 | 223 | 73  | 73  | 0   |
| Ascomycot Dothideomycetes Capnodiales Teratosphaeriales Pseudoteratosphaeria | 0   | 0   | 0   | 0   |
| Ascomycot Eurotiomycetes Onygenales Onygenaceae Zeloasperisporium            | 0   | 0   | 0   | 0   |
| Ascomycot Dothideomycetes Pleosporales Didymosporales Paraconiothyrium       | 0   | 0   | 0   | 0   |

|                                                                             |     |     |     |     |
|-----------------------------------------------------------------------------|-----|-----|-----|-----|
| Ascomycot Dothideomycetes Dothideales Radulidiales                          | 157 | 165 | 0   | 0   |
| Ascomycot Sordariomycetes Diaporthales Diaporthaceae Diaporthe              | 0   | 22  | 26  | 0   |
| Ascomycot Dothideomycetes Capnodiales Mycosphaerellaceae                    | 96  | 100 | 115 | 0   |
| Ascomycot Eurotiomycetes Eurotiales                                         | 44  | 61  | 13  | 5   |
| Ascomycot Dothideomycetes Capnodiales Mycosphaerellaceae Madagascariomyces  | 0   | 0   | 0   | 0   |
| Ascomycot Sordariomycetes Hypocreales Nectriaceae Neocosmospora             | 92  | 28  | 47  | 0   |
| Ascomycot Dothideomycetes Pleosporales Didymosporales Pseudopithomyces      | 0   | 0   | 28  | 0   |
| Ascomycot Sordariomycetes Sordariales Chaetomiales Botryotrichum            | 185 | 65  | 87  | 0   |
| Ascomycot Sordariomycetes Diaporthales Diaporthaceae Diaporthe              | 0   | 0   | 0   | 0   |
| Ascomycot Dothideomycetes Capnodiales Mycosphaerellaceae Zasmidium          | 0   | 0   | 0   | 0   |
| Ascomycot Dothideomycetes Capnodiales Mycosphaerellaceae                    | 0   | 0   | 0   | 0   |
| Ascomycot Dothideomycetes Capnodiales Mycosphaerellaceae Madagascariomyces  | 0   | 0   | 0   | 0   |
| Ascomycot Dothideomycetes Pleosporales Pleosporaceae Curvularia             | 0   | 0   | 0   | 0   |
| Ascomycot Dothideomycetes Capnodiales Mycosphaerellaceae                    | 0   | 9   | 0   | 0   |
| Ascomycot Dothideomycetes Capnodiales                                       | 14  | 0   | 307 | 0   |
| Ascomycot Dothideomycetes Pleosporales Lophiostomataceae                    | 26  | 0   | 0   | 0   |
| Ascomycot Eurotiomycetes Phaeomoniaceae Phaeomonium Xenocyclusporium        | 42  | 0   | 0   | 5   |
| Ascomycot Sordariomycetes Trichosporales Trichosporales Nigrospora          | 0   | 0   | 0   | 0   |
| Ascomycot Dothideomycetes Capnodiales Mycosphaerellaceae Stomiopeltis       | 0   | 0   | 312 | 0   |
| Ascomycot Dothideomycetes Myriangiales Elsinoaceae Elsinoe                  | 126 | 57  | 114 | 0   |
| Ascomycot Sordariomycetes Chaetosporales Chaetosporales Pseudodinemasporeum | 0   | 0   | 0   | 0   |
| Ascomycot Dothideomycetes Asterinales Parmulariales Parmularia              | 0   | 0   | 0   | 0   |
| Ascomycot Dothideomycetes Capnodiales Mycosphaerellaceae Paramycosphaerella | 0   | 0   | 167 | 136 |
| Ascomycot Sordariomycetes Trichosporales Trichosporales Nigrospora          | 201 | 28  | 73  | 0   |
| Ascomycot Dothideomycetes Capnodiales Teratosphaeriaceae                    | 0   | 0   | 302 | 0   |
| Ascomycot Leotiomyces Helotiales Chaetomiales Pilidium                      | 249 | 0   | 38  | 0   |
| Ascomycot Sordariomycetes Sordariales Chaetomiales Botryotrichum            | 110 | 99  | 88  | 0   |
| Ascomycot Sordariomycetes Diaporthales Diaporthaceae Diaporthe              | 0   | 0   | 0   | 0   |
| Ascomycot Dothideomycetes Pleosporales Phaeosporales Phaeosphaeria          | 0   | 0   | 0   | 0   |
| Ascomycot Sordariomycetes Hypocreales Nectriaceae Fusarium                  | 105 | 49  | 139 | 0   |
| Ascomycot Dothideomycetes Capnodiales Teratosphaeriaceae                    | 0   | 0   | 286 | 0   |
| Ascomycot Dothideomycetes Pleosporales Didymellaceae Didymella              | 0   | 0   | 0   | 0   |
| Ascomycot Sordariomycetes Diaporthales Diaporthaceae Diaporthe              | 0   | 0   | 0   | 0   |
| Ascomycot Dothideomycetes Capnodiales Teratosphaeriaceae                    | 0   | 249 | 0   | 0   |
| Ascomycot Eurotiomycetes Chaetothiales Chaetothiales Strelitziana           | 0   | 0   | 0   | 0   |
| Ascomycot Dothideomycetes                                                   | 0   | 0   | 270 | 0   |
| Ascomycot Leotiomyces Helotiales Helotiaceae Tetracladium                   | 111 | 115 | 41  | 0   |
| Ascomycot Eurotiomycetes Chaetothiales Chaetothiales Strelitziana           | 28  | 0   | 143 | 0   |
| Ascomycot Leotiomyces Thelebolales Pseudeurotiales Pseudogymnoascus         | 0   | 0   | 0   | 0   |
| Ascomycot Sordariomycetes Hypocreales Nectriaceae Fusicolla                 | 150 | 47  | 63  | 0   |
| Ascomycot Dothideomycetes Capnodiales Mycosphaerellaceae Madagascariomyces  | 0   | 0   | 0   | 0   |
| Ascomycot Sordariomycetes Diaporthales Diaporthaceae Diaporthe              | 0   | 28  | 0   | 0   |
| Ascomycot Sordariomycetes Diaporthales Cryphonectria Mastigosporella        | 0   | 0   | 0   | 0   |
| Ascomycot Leotiomyces Helotiales Helotiales Triposporium                    | 0   | 167 | 0   | 0   |
| Ascomycot Dothideomycetes Dothideales Aureobasiales Aureobasidium           | 0   | 0   | 0   | 251 |
| Ascomycot Dothideomycetes Capnodiales                                       | 0   | 0   | 250 | 0   |
| Ascomycot Sordariomycetes Diaporthales Diaporthaceae Diaporthe              | 0   | 0   | 0   | 0   |
| Ascomycot Sordariomycetes                                                   | 0   | 0   | 0   | 0   |
| Ascomycot Sordariomycetes Diaporthales Diaporthaceae Diaporthe              | 0   | 0   | 0   | 0   |
| Ascomycot Dothideomycetes Pleosporales Sporormiella Preussia                | 0   | 0   | 0   | 0   |

|                                                                |     |     |     |     |
|----------------------------------------------------------------|-----|-----|-----|-----|
| Ascomycot Dothideomr Pleosporal Didymospor Paraphaeosphaeria   | 0   | 0   | 0   | 0   |
| Ascomycot Dothideomr Capnodiale Mycospha Neoceratosperma       | 0   | 0   | 0   | 0   |
| Ascomycot Sordariomr Hypocreale Hypocreac Trichoderma          | 0   | 0   | 0   | 0   |
| Ascomycot Dothideomr Capnodiales                               | 235 | 3   | 0   | 0   |
| Ascomycot Dothideomr Capnodiale Cladospori Cladosporium        | 0   | 0   | 0   | 0   |
| Ascomycot Leotiomyr Helotiales Hyaloscyph Crucellisporiopsis   | 0   | 236 | 0   | 0   |
| Ascomycot Leotiomyr Erysiphale Erysiphace Blumeria             | 0   | 0   | 0   | 0   |
| Ascomycot Dothideomr Capnodiale Mycosphaerellaceae             | 0   | 0   | 0   | 0   |
| Ascomycot Dothideomr Pleosporal Teichospor Magnibotryascoma    | 31  | 0   | 63  | 0   |
| Ascomycot Dothideomr Venturiale Sympoveni Neocoleroa           | 0   | 229 | 0   | 0   |
| Ascomycot Dothideomr Pleosporal Didymellac Didymella           | 0   | 0   | 0   | 0   |
| Ascomycot Sordariomr Hypocreale Nectriacea Gibberella          | 0   | 0   | 0   | 0   |
| Ascomycot Sordariomr Sordariales Lasiosphae Schizothecium      | 126 | 33  | 67  | 0   |
| Ascomycot Sordariomr Hypocreale Bionectriac Bullanockia        | 0   | 0   | 0   | 0   |
| Ascomycot Dothideomr Botryospha Botryospha Neofusicoccum       | 0   | 0   | 0   | 0   |
| Ascomycot Dothideomr Pleosporal Massarina Helminthosporium     | 86  | 0   | 84  | 0   |
| Ascomycot Sordariomr Diaporthal Diaporthac Diaporthe           | 0   | 0   | 25  | 0   |
| Ascomycot Sordariomr Diaporthal Diaporthac Diaporthe           | 79  | 0   | 0   | 0   |
| Ascomycot Dothideomr Capnodiale Dissoconia Uwebraunia          | 2   | 0   | 0   | 0   |
| Ascomycot Sordariomr Diaporthal Diaporthac Diaporthe           | 0   | 0   | 0   | 0   |
| Ascomycot Archaeorhizomycetes                                  | 38  | 17  | 0   | 0   |
| Ascomycot Sordariomr Glomerella Glomerella Colletotrichum      | 0   | 0   | 0   | 0   |
| Ascomycot Leotiomyr Helotiales                                 | 7   | 0   | 0   | 0   |
| Ascomycot Dothideomr Capnodiale Mycosphaerellaceae             | 66  | 33  | 90  | 0   |
| Ascomycota                                                     | 0   | 0   | 0   | 0   |
| Ascomycot Dothideomycetes                                      | 0   | 0   | 188 | 0   |
| Ascomycot Dothideomr Capnodiale Teratosphaeriaceae             | 0   | 152 | 32  | 0   |
| Ascomycot Dothideomr Pleosporal Didymellac Nothophoma          | 0   | 0   | 0   | 0   |
| Ascomycot Dothideomr Capnodiales                               | 40  | 0   | 0   | 0   |
| Ascomycot Dothideomr Capnodiale Dissoconia Uwebraunia          | 0   | 0   | 0   | 0   |
| Ascomycot Dothideomr Capnodiales                               | 0   | 0   | 0   | 0   |
| Ascomycot Dothideomr Capnodiale Mycosphae Zasmidium            | 0   | 0   | 175 | 0   |
| Ascomycot Eurotiomyr Eurotiales Aspergillac Penicillium        | 21  | 0   | 0   | 6   |
| Ascomycot Dothideomr Capnodiale Mycosphae Paramycosphaerella   | 0   | 0   | 168 | 0   |
| Ascomycot Eurotiomyr Chaetothy Chaetothy Strelitziana          | 0   | 0   | 14  | 0   |
| Ascomycot Sordariomr Diaporthal Diaporthac Diaporthe           | 0   | 0   | 0   | 0   |
| Ascomycot Dothideomr Capnodiales                               | 38  | 27  | 101 | 0   |
| Ascomycot Dothideomr Capnodiale Mycosphaerellaceae             | 0   | 0   | 0   | 149 |
| Ascomycot Dothideomr Capnodiale Teratosphae Xenoteratosphaeria | 61  | 0   | 54  | 0   |
| Ascomycot Dothideomr Pleosporal Massarina Helminthosporium     | 103 | 0   | 42  | 0   |
| Ascomycot Leotiomyr Helotiales Helotiacea Tetracladium         | 88  | 32  | 42  | 0   |
| Ascomycot Sordariomr Diaporthal Diaporthac Diaporthe           | 0   | 0   | 0   | 0   |
| Ascomycot Sordariomr Diaporthal Diaporthac Diaporthe           | 0   | 0   | 0   | 0   |
| Ascomycot Sordariomr Trichospha Trichospha Nigrospora          | 0   | 0   | 0   | 0   |
| Ascomycot Eurotiomyr Phaeomon Phaeomoniellaceae                | 22  | 91  | 48  | 0   |
| Ascomycot Sordariomr Hypocreale Nectriacea Fusarium solani     | 99  | 34  | 27  | 0   |
| Ascomycot Dothideomr Venturiale Sympoveni Neocoleroa           | 54  | 106 | 0   | 0   |
| Ascomycot Eurotiomyr Onygenale Onygenale Zeloasperisporium     | 0   | 0   | 38  | 0   |
| Ascomycot Leotiomyr Helotiales Dermateac Pezicula              | 154 | 0   | 0   | 0   |
| Ascomycot Dothideomr Capnodiale Teratosphae Neophaeothecoidea  | 0   | 0   | 158 | 0   |

|                                                                        |     |     |     |   |
|------------------------------------------------------------------------|-----|-----|-----|---|
| Ascomycot Dothideomycetes Capnodiales                                  | 0   | 0   | 158 | 0 |
| Ascomycot Dothideomycetes Dothideales Aureobasidium                    | 0   | 0   | 0   | 0 |
| Ascomycot Leotiomycetes Thelebolales Thelebolales Thelebolales         | 49  | 70  | 38  | 0 |
| Ascomycot Dothideomycetes Capnodiales Mycosphaerella Stomiopeltis      | 0   | 0   | 157 | 0 |
| Ascomycot Sordariomycetes Hypocreales Nectriaceae Cylindrocarpum       | 85  | 38  | 33  | 0 |
| Ascomycot Sordariomycetes Diaporthales Diaporthaceae Diaporthe         | 0   | 0   | 0   | 0 |
| Ascomycot Dothideomycetes Capnodiales Mycosphaerellaceae               | 0   | 0   | 0   | 0 |
| Ascomycot Dothideomycetes Pleosporales Sporormiella Preussia           | 155 | 0   | 0   | 0 |
| Ascomycot Eurotiomycetes Eurotiales                                    | 23  | 0   | 0   | 0 |
| Ascomycot Leotiomycetes Helotiales                                     | 151 | 0   | 0   | 0 |
| Ascomycot Dothideomycetes Capnodiales Mycosphaerellaceae               | 18  | 46  | 77  | 0 |
| Ascomycot Dothideomycetes Pleosporales Didymellaceae Epicoccum         | 0   | 0   | 67  | 0 |
| Ascomycot Sordariomycetes Hypocreales Hypocreaceae Sarocladium         | 9   | 0   | 5   | 0 |
| Ascomycot Eurotiomycetes Chaetothiales Chaetothiales Strelitziana      | 9   | 0   | 0   | 0 |
| Ascomycot Dothideomycetes Pleosporales Phaeosphaeria Neosetophoma      | 6   | 59  | 0   | 0 |
| Ascomycot Dothideomycetes                                              | 0   | 150 | 0   | 0 |
| Ascomycot Dothideomycetes Capnodiales Mycosphaerella Stomiopeltis      | 0   | 25  | 123 | 0 |
| Ascomycot Sordariomycetes Diaporthales Diaporthaceae Diaporthe         | 0   | 0   | 0   | 0 |
| Ascomycot Sordariomycetes Diaporthales Diaporthaceae Diaporthe         | 0   | 0   | 0   | 0 |
| Ascomycot Sordariomycetes Diaporthales Diaporthaceae Diaporthe         | 0   | 0   | 0   | 0 |
| Ascomycot Dothideomycetes Myriangiales                                 | 37  | 0   | 95  | 0 |
| Ascomycot Sordariomycetes Xylariales Xylariaceae Hypoxylon             | 0   | 0   | 0   | 2 |
| Ascomycot Dothideomycetes Pleosporales Phaeosphaeria Phaeosphaeria     | 0   | 0   | 0   | 0 |
| Ascomycot Sordariomycetes Glomerella Plectosphaeria Plectosphaerella   | 56  | 47  | 0   | 9 |
| Ascomycot Sordariomycetes Hypocreales Cordycipitaceae Simplicillium    | 0   | 0   | 0   | 0 |
| Ascomycot Dothideomycetes Pleosporales Phaeosphaeriaceae               | 0   | 0   | 0   | 0 |
| Ascomycot Sordariomycetes Xylariales Microdochium Microdochium         | 47  | 57  | 35  | 0 |
| Ascomycot Sordariomycetes Diaporthales Diaporthaceae Diaporthe         | 0   | 0   | 0   | 0 |
| Ascomycot Sordariomycetes Microascales Microascales Canariomyces       | 0   | 0   | 0   | 0 |
| Ascomycot Dothideomycetes Capnodiales Mycosphaerella Pallidocercospora | 0   | 0   | 0   | 0 |
| Ascomycot Dothideomycetes Pleosporales Didymellaceae Epicoccum         | 89  | 0   | 0   | 0 |
| Ascomycot Eurotiomycetes Eurotiales Aspergillaceae Penicillium         | 92  | 33  | 11  | 0 |
| Ascomycot Sordariomycetes Trichosphaeria Trichosphaeria Nigrospora     | 0   | 0   | 0   | 0 |
| Ascomycot Sordariomycetes                                              | 3   | 0   | 0   | 0 |
| Ascomycot Eurotiomycetes Phaeomonium Phaeomoniumellaceae               | 0   | 128 | 4   | 0 |
| Ascomycot Sordariomycetes Sordariales Sordariaceae Gelasinospora       | 0   | 131 | 0   | 0 |
| Ascomycot Dothideomycetes Pleosporales Didymosphaeria Paraconiothyrium | 0   | 0   | 0   | 0 |
| Ascomycot Dothideomycetes Capnodiales Teratosphaeria Catenulostroma    | 22  | 0   | 13  | 0 |
| Ascomycot Dothideomycetes Capnodiales Teratosphaeriaceae               | 0   | 0   | 0   | 0 |
| Ascomycot Sordariomycetes Xylariales Xylariaceae Xylaria               | 0   | 0   | 0   | 0 |
| Ascomycot Sordariomycetes Sordariales Chaetomiaceae                    | 0   | 23  | 0   | 0 |
| Ascomycot Sordariomycetes Diaporthales Diaporthaceae Diaporthe         | 0   | 0   | 0   | 0 |
| Ascomycot Dothideomycetes Capnodiales Mycosphaerellaceae               | 37  | 23  | 64  | 0 |
| Ascomycot Sordariomycetes Sordariales                                  | 0   | 0   | 0   | 0 |
| Ascomycot Dothideomycetes Capnodiales Mycosphaerella Stomiopeltis      | 0   | 0   | 123 | 0 |
| Ascomycot Sordariomycetes Diaporthales Diaporthaceae                   | 0   | 0   | 0   | 0 |
| Ascomycot Sordariomycetes Glomerella Glomerellaceae                    | 57  | 0   | 0   | 0 |
| Ascomycot Eurotiomycetes Eurotiales Aspergillaceae                     | 0   | 0   | 0   | 0 |
| Ascomycot Dothideomycetes Capnodiales Mycosphaerella Geastrumia        | 0   | 95  | 22  | 0 |
| Ascomycot Leotiomycetes Thelebolales Pseudeuro Pseudogymnoascus        | 70  | 21  | 25  | 0 |

|                                                                                 |     |     |    |    |
|---------------------------------------------------------------------------------|-----|-----|----|----|
| Ascomycot Leotiomyces Helotiales Helotiaceae Tetracladium                       | 34  | 21  | 38 | 0  |
| Ascomycot Sordariomycetes Diaporthales Diaporthaceae Diaporthe                  | 0   | 0   | 5  | 0  |
| Ascomycot Sordariomycetes Trichosphaeriales Trichosphaeraceae Nigrospora        | 0   | 0   | 0  | 0  |
| Ascomycot Sordariomycetes Diaporthales Diaporthaceae Diaporthe                  | 0   | 0   | 0  | 0  |
| Ascomycot Sordariomycetes Glomerellales Glomerellaceae Colletotrichum           | 0   | 67  | 0  | 0  |
| Ascomycot Sordariomycetes Diaporthales Diaporthaceae Diaporthe                  | 0   | 0   | 0  | 0  |
| Ascomycot Sordariomycetes Diaporthales                                          | 0   | 0   | 0  | 0  |
| Ascomycot Dothideomycetes Capnodiales Teratosphaeriaceae                        | 0   | 0   | 0  | 0  |
| Ascomycot Dothideomycetes Pleosporales Didymosphaeriales Paracamarosporium      | 0   | 0   | 0  | 10 |
| Ascomycot Dothideomycetes Capnodiales Mycosphaerellaceae                        | 108 | 0   | 0  | 0  |
| Ascomycot Dothideomycetes Pleosporales Didymellaceae Neoascochyta               | 0   | 0   | 0  | 0  |
| Ascomycot Dothideomycetes Capnodiales Mycosphaerellaceae                        | 0   | 0   | 0  | 0  |
| Ascomycot Dothideomycetes Dothideales Aureobasidiales Aureobasidium             | 16  | 11  | 62 | 0  |
| Ascomycot Lecanoromycetes Ostropales Stictidaceae Cyanodermella                 | 11  | 87  | 0  | 0  |
| Ascomycot Sordariomycetes Diaporthales Diaporthaceae Diaporthe                  | 0   | 28  | 0  | 0  |
| Ascomycot Sordariomycetes                                                       | 0   | 0   | 0  | 8  |
| Ascomycot Eurotiomycetes Onygenales Onygenaceae Zeloasperisporium               | 0   | 0   | 0  | 0  |
| Ascomycot Dothideomycetes Capnodiales Mycosphaeraceae Zasmidium                 | 0   | 105 | 0  | 0  |
| Ascomycot Dothideomycetes Pleosporales Didymellaceae                            | 0   | 0   | 0  | 0  |
| Ascomycot Sordariomycetes Trichosphaeriales Trichosphaeraceae Nigrospora oryzae | 0   | 0   | 0  | 0  |
| Ascomycot Eurotiomycetes Eurotiales Trichocomaceae Talaromyces                  | 0   | 0   | 0  | 0  |
| Ascomycot Dothideomycetes Venturiales Symplocosporiales Neocoleroa              | 80  | 0   | 22 | 0  |
| Ascomycot Dothideomycetes Capnodiales Mycosphaerellaceae                        | 0   | 0   | 0  | 0  |
| Ascomycot Leotiomyces Helotiales Helotiaceae                                    | 36  | 38  | 27 | 0  |
| Ascomycot Dothideomycetes Capnodiales Mycosphaeraceae Zasmidium                 | 30  | 40  | 0  | 0  |
| Ascomycot Dothideomycetes Capnodiales Mycosphaeraceae Ramularia                 | 0   | 0   | 0  | 0  |
| Ascomycot Dothideomycetes Asterinales Parmulariales Parmularia                  | 0   | 0   | 0  | 0  |
| Ascomycot Dothideomycetes Capnodiales Capnodiales Microcyclospora               | 16  | 10  | 73 | 0  |
| Ascomycot Sordariomycetes Trichosphaeriales Trichosphaeraceae Nigrospora        | 0   | 0   | 0  | 0  |
| Ascomycot Sordariomycetes Hypocreales Nectriaceae Neocosmospora                 | 0   | 40  | 0  | 0  |
| Ascomycot Dothideomycetes Capnodiales                                           | 0   | 0   | 0  | 0  |
| Ascomycot Dothideomycetes Pleosporales Didymellaceae Epicoccum                  | 0   | 0   | 0  | 0  |
| Ascomycot Sordariomycetes Diaporthales Diaporthaceae Diaporthe                  | 0   | 0   | 0  | 0  |
| Ascomycot Dothideomycetes Capnodiales Teratosphaeriaceae                        | 76  | 0   | 9  | 0  |
| Ascomycot Dothideomycetes Venturiales Symplocosporiales Ochroconis              | 0   | 0   | 0  | 0  |
| Ascomycot Dothideomycetes Pleosporales Teichosporiales Magnibotryascoma         | 0   | 0   | 0  | 0  |
| Ascomycot Sordariomycetes Diaporthales Diaporthaceae Diaporthe                  | 0   | 0   | 0  | 0  |
| Ascomycot Dothideomycetes Capnodiales Dissoconiales Uwebraunia                  | 0   | 0   | 0  | 0  |
| Ascomycot Dothideomycetes Pleosporales Didymosphaeriales Kalmusia               | 0   | 0   | 0  | 0  |
| Ascomycot Sordariomycetes Diaporthales Diaporthaceae Diaporthe                  | 0   | 0   | 0  | 0  |
| Ascomycot Sordariomycetes Diaporthales Schizoparni Coniella                     | 35  | 13  | 44 | 0  |
| Ascomycot Dothideomycetes Capnodiales Mycosphaeraceae Australosphaerella        | 14  | 0   | 53 | 0  |
| Ascomycot Dothideomycetes Pleosporales Massariiales Helminthosporium            | 0   | 92  | 0  | 0  |
| Ascomycot Dothideomycetes Capnodiales Mycosphaerellaceae                        | 0   | 0   | 0  | 0  |
| Ascomycot Sordariomycetes Diaporthales Cryphonectriaceae Mastigospora           | 0   | 0   | 0  | 0  |
| Ascomycot Dothideomycetes                                                       | 0   | 0   | 90 | 0  |
| Ascomycot Dothideomycetes Pleosporales Lophiostomataceae                        | 0   | 0   | 90 | 0  |
| Ascomycot Dothideomycetes Pleosporales Cucurbitaria Pyrenochaetopsis            | 35  | 28  | 25 | 0  |
| Ascomycot Dothideomycetes Myriangiales Elsinoaceae                              | 3   | 0   | 0  | 0  |
| Ascomycot Dothideomycetes Botryosphaeriales Planistroma Ramimonilia             | 21  | 0   | 59 | 0  |



|                                                                                                 |    |    |    |    |
|-------------------------------------------------------------------------------------------------|----|----|----|----|
| Ascomycot Sordariom <sup>1</sup> Xylariales Xylariaceae Muscodor                                | 0  | 0  | 3  | 0  |
| Ascomycot Sordariom <sup>1</sup> Sordariales Lasiosphae Cladorrhinum                            | 28 | 43 | 14 | 0  |
| Ascomycot Sordariom <sup>1</sup> Diaporthal <sup>1</sup> Diaporthac Diaporthe                   | 0  | 0  | 0  | 0  |
| Ascomycot Sordariom <sup>1</sup> Hypocreale Nectriaceae Neocosmospora                           | 47 | 16 | 19 | 0  |
| Ascomycota                                                                                      | 0  | 82 | 0  | 0  |
| Ascomycot Dothideom <sup>1</sup> Capnodiale Teratosph <sup>2</sup> Pseudoteratosphaeria         | 0  | 0  | 0  | 0  |
| Ascomycot Dothideom <sup>1</sup> Capnodiale Teratosphaeriaceae                                  | 0  | 0  | 0  | 0  |
| Ascomycot Dothideom <sup>1</sup> Asterinales Parmularia Parmularia                              | 0  | 0  | 0  | 0  |
| Ascomycot Dothideom <sup>1</sup> Capnodiale Teratosph <sup>2</sup> Euteratosphaeria             | 71 | 0  | 10 | 0  |
| Ascomycot Sordariom <sup>1</sup> Trichospha Trichospha Nigrospora                               | 0  | 0  | 0  | 0  |
| Ascomycot Dothideom <sup>1</sup> Pleosporal <sup>1</sup> Didymellac Epicoccum                   | 0  | 0  | 0  | 0  |
| Ascomycot Sordariom <sup>1</sup> Glomerella Plectosphaerellaceae                                | 55 | 25 | 0  | 0  |
| Ascomycot Dothideom <sup>1</sup> Pleosporal <sup>1</sup> Didymellac Didymella                   | 0  | 0  | 0  | 0  |
| Ascomycot Eurotiomy <sup>1</sup> Onygenale Onygenale Zeloasperisporium                          | 0  | 0  | 0  | 0  |
| Ascomycot Dothideom <sup>1</sup> Capnodiales                                                    | 0  | 0  | 0  | 0  |
| Ascomycot Sordariom <sup>1</sup> Diaporthal <sup>1</sup> Diaporthac Diaporthe                   | 0  | 0  | 0  | 0  |
| Ascomycot Dothideom <sup>1</sup> Capnodiale Teratosphaeriaceae                                  | 17 | 13 | 49 | 0  |
| Ascomycot Dothideom <sup>1</sup> Capnodiale Mycospha <sup>1</sup> Geastrumia                    | 0  | 0  | 63 | 0  |
| Ascomycot Dothideom <sup>1</sup> Capnodiale Teratosph <sup>2</sup> Penidiella                   | 0  | 0  | 0  | 0  |
| Ascomycot Dothideom <sup>1</sup> Pleosporal <sup>1</sup> Didymosp <sup>1</sup> Kalmusia         | 0  | 0  | 0  | 0  |
| Ascomycot Sordariom <sup>1</sup> Hypocreale Clavicipita <sup>1</sup> Metarhiziu robertsii       | 66 | 4  | 8  | 0  |
| Ascomycot Eurotiomy <sup>1</sup> Chaetothyriales                                                | 0  | 21 | 28 | 0  |
| Ascomycot Dothideom <sup>1</sup> Capnodiale Mycospha <sup>1</sup> Paramycosphaerella            | 0  | 0  | 78 | 0  |
| Ascomycot Dothideom <sup>1</sup> Capnodiale Mycospha <sup>1</sup> Phaeophleospora               | 0  | 0  | 0  | 0  |
| Ascomycot Dothideom <sup>1</sup> Capnodiale Mycosphaerellaceae                                  | 0  | 0  | 0  | 0  |
| Ascomycot Dothideom <sup>1</sup> Capnodiale Mycospha <sup>1</sup> Teratoramularia               | 0  | 0  | 0  | 0  |
| Ascomycot Sordariom <sup>1</sup> Sordariales                                                    | 13 | 0  | 0  | 4  |
| Ascomycot Sordariom <sup>1</sup> Glomerella Glomerella Colletotrichum                           | 0  | 0  | 0  | 0  |
| Ascomycot Leotiomy <sup>1</sup> Helotiales                                                      | 75 | 0  | 0  | 0  |
| Ascomycot Eurotiomy <sup>1</sup> Onygenale Onygenale Zeloasperisporium                          | 0  | 0  | 5  | 70 |
| Ascomycot Dothideom <sup>1</sup> Pleosporal <sup>1</sup> Pleosporac Curvularia                  | 0  | 0  | 0  | 0  |
| Ascomycot Dothideom <sup>1</sup> Capnodiale Teratosph <sup>2</sup> Pseudoteratosphaeria         | 0  | 0  | 0  | 0  |
| Ascomycot Sordariom <sup>1</sup> Glomerella Glomerella Colletotrichum                           | 0  | 0  | 0  | 0  |
| Ascomycot Dothideom <sup>1</sup> Capnodiale Mycospha <sup>1</sup> Zasmidium                     | 0  | 0  | 0  | 0  |
| Ascomycot Eurotiomy <sup>1</sup> Onygenale Onygenale Zeloasperisporium                          | 0  | 0  | 0  | 0  |
| Ascomycot Dothideom <sup>1</sup> Hysteriales Hysteriace Gloniopsis                              | 10 | 0  | 0  | 0  |
| Ascomycot Dothideom <sup>1</sup> Capnodiale Mycospha <sup>1</sup> Neoceratosperma               | 0  | 0  | 0  | 0  |
| Ascomycot Dothideom <sup>1</sup> Capnodiale Mycospha <sup>1</sup> Zasmidium                     | 0  | 0  | 0  | 0  |
| Ascomycot Dothideom <sup>1</sup> Capnodiale Teratosphaeriaceae                                  | 0  | 0  | 0  | 0  |
| Ascomycot Sordariom <sup>1</sup> Diaporthal <sup>1</sup> Cryphonectriaceae                      | 0  | 0  | 0  | 0  |
| Ascomycot Dothideom <sup>1</sup> Capnodiales                                                    | 0  | 36 | 0  | 0  |
| Ascomycot Dothideom <sup>1</sup> Capnodiales                                                    | 0  | 0  | 4  | 0  |
| Ascomycot Sordariom <sup>1</sup> Diaporthal <sup>1</sup> Diaporthac Diaporthe                   | 0  | 0  | 0  | 0  |
| Ascomycot Sordariom <sup>1</sup> Diaporthal <sup>1</sup> Diaporthaceae                          | 0  | 0  | 0  | 0  |
| Ascomycot Dothideom <sup>1</sup> Pleosporal <sup>1</sup> Didymosp <sup>1</sup> Paraconiothyrium | 0  | 0  | 0  | 0  |
| Ascomycot Sordariom <sup>1</sup> Sordariales Lasiosphae Cercophora                              | 60 | 11 | 0  | 0  |
| Ascomycot Sordariom <sup>1</sup> Sordariales Lasiosphae Apodus                                  | 56 | 6  | 9  | 0  |
| Ascomycot Sordariom <sup>1</sup> Hypocreale Nectriaceae                                         | 42 | 16 | 13 | 0  |
| Ascomycot Leotiomy <sup>1</sup> Helotiales Sclerotinia Moellerodiscus                           | 0  | 71 | 0  | 0  |
| Ascomycot Dothideom <sup>1</sup> Botryosph <sup>2</sup> Planistrom Ramimonilia                  | 0  | 14 | 51 | 0  |

|                                                                    |    |    |    |    |
|--------------------------------------------------------------------|----|----|----|----|
| Ascomycot Eurotiomyi Eurotiales Aspergillac Penicillium cairnsense | 0  | 0  | 0  | 0  |
| Ascomycot Sordariom Hypocreale Hypocreac Trichoderma               | 21 | 42 | 7  | 0  |
| Ascomycot Sordariom Hypocreale Nectriaceae                         | 0  | 19 | 0  | 0  |
| Ascomycot Dothideom Botryospha Phyllosticta Phyllosticta           | 0  | 0  | 0  | 31 |
| Ascomycot Dothideom Capnodiale Mycospha Paramycosphaerella         | 0  | 0  | 0  | 0  |
| Ascomycot Sordariom Hypocreale Nectriacea Neocosmospora            | 0  | 0  | 0  | 0  |
| Ascomycot Sordariom Diaporthal Diaporthac Diaporthe                | 0  | 0  | 0  | 0  |
| Ascomycot Sordariom Diaporthal Diaporthac Diaporthe                | 0  | 0  | 0  | 0  |
| Ascomycot Dothideom Pleosporales                                   | 6  | 48 | 0  | 0  |
| Ascomycot Sordariom Diaporthal Diaporthaceae                       | 0  | 0  | 0  | 0  |
| Ascomycot Sordariom Xylariales Xylariaceae Daldinia                | 0  | 0  | 3  | 0  |
| Ascomycot Dothideom Pleosporal Didymellac Didymella                | 0  | 0  | 0  | 0  |
| Ascomycot Pezizomyci Pezizales Pyronemataceae                      | 0  | 66 | 0  | 0  |
| Ascomycot Dothideom Pleosporal Sporormia Preussia                  | 0  | 0  | 0  | 0  |
| Ascomycot Dothideom Pleosporal Didymellac Boeremia                 | 0  | 0  | 0  | 0  |
| Ascomycot Dothideom Capnodiale Mycospha Zasmidium                  | 0  | 0  | 0  | 0  |
| Ascomycot Dothideom Pleosporal Pleosporal Parapyrenochaeta         | 4  | 0  | 61 | 0  |
| Ascomycot Eurotiomyi Chaetothyi Chaetothyi Ceramothyrium           | 0  | 0  | 0  | 0  |
| Ascomycot Dothideom Pleosporal Didymellaceae                       | 0  | 0  | 0  | 0  |
| Ascomycot Dothideom Capnodiale Teratospha Catenulostroma           | 28 | 0  | 22 | 0  |
| Ascomycota                                                         | 0  | 64 | 0  | 0  |
| Ascomycot Dothideom Capnodiale Capnodiace Capnodium                | 23 | 9  | 31 | 0  |
| Ascomycot Dothideom Capnodiale Cladospori Cladosporium             | 10 | 0  | 0  | 0  |
| Ascomycot Dothideom Pleosporal Didymospha Paraconiothyrium         | 0  | 0  | 0  | 0  |
| Ascomycot Dothideom Capnodiales                                    | 62 | 0  | 0  | 0  |
| Ascomycot Eurotiomyi Chaetothyriales                               | 62 | 0  | 0  | 0  |
| Ascomycot Dothideomycetes                                          | 0  | 62 | 0  | 0  |
| Ascomycot Sordariom Hypocreale Hypocreac Trichothecium             | 0  | 0  | 0  | 0  |
| Ascomycot Sordariomycetes                                          | 61 | 0  | 0  | 0  |
| Ascomycot Dothideom Capnodiale Mycospha Geastrumia                 | 21 | 8  | 32 | 0  |
| Ascomycot Eurotiomyi Chaetothyi Chaetothyi Strelitziana            | 0  | 54 | 0  | 7  |
| Ascomycot Sordariom Xylariales Amphisphe Amphisphaeria             | 0  | 9  | 0  | 0  |
| Ascomycot Sordariom Diaporthal Diaporthac Diaporthe                | 0  | 0  | 0  | 0  |
| Ascomycot Sordariom Hypocreale Hypocreac Trichoderma               | 15 | 3  | 0  | 0  |
| Ascomycot Dothideom Pleosporal Periconiace Periconia               | 7  | 8  | 0  | 0  |
| Ascomycot Eurotiomyi Eurotiales Trichocom Talaromyces              | 0  | 37 | 0  | 11 |
| Ascomycot Sordariom Chaetosphaeriales                              | 0  | 26 | 0  | 0  |
| Ascomycot Dothideom Pleosporal Phaeospha Setophoma                 | 0  | 0  | 0  | 0  |
| Ascomycot Dothideom Capnodiale Mycospha Zasmidium                  | 59 | 0  | 0  | 0  |
| Ascomycot Sordariom Hypocreale Stachybotr Stachybotrys             | 24 | 11 | 24 | 0  |
| Ascomycot Dothideom Dothideom Dothideom Gonatophragmium            | 0  | 59 | 0  | 0  |
| Ascomycot Leotiomyi Helotiales Hyaloscyph Proliferodiscus          | 0  | 0  | 0  | 0  |
| Ascomycot Sordariom Hypocreales                                    | 22 | 12 | 24 | 0  |
| Ascomycot Dothideom Pleosporal Massarina Helminthosporium          | 0  | 58 | 0  | 0  |
| Ascomycot Sordariom Diaporthal Diaporthac Diaporthe                | 0  | 0  | 0  | 0  |
| Ascomycot Sordariom Xylariales Xylariaceae Muscodor                | 0  | 0  | 0  | 0  |
| Ascomycot Eurotiomyi Phaeomon Phaeomon Neophaeomoniella            | 0  | 0  | 0  | 0  |
| Ascomycot Dothideom Asterinales Parmularia Parmularia              | 0  | 0  | 0  | 0  |
| Ascomycot Dothideom Tubeufiale Tubeufiaceae                        | 0  | 0  | 0  | 0  |
| Ascomycot Leotiomyi Helotiales Hyaloscyph Crucellisporiopsis       | 57 | 0  | 0  | 0  |

|                                                                |    |    |    |    |
|----------------------------------------------------------------|----|----|----|----|
| Ascomycot Dothideom Botryospha Botryospha Pseudofusicoccum     | 0  | 14 | 0  | 0  |
| Ascomycot Sordariom Diaporthal Diaporthac Diaporthe            | 0  | 0  | 0  | 0  |
| Ascomycot Dothideom Dothideom Muyocopri Muyocopron             | 0  | 0  | 0  | 0  |
| Ascomycot Dothideom Pleosporal Teichospor Magnibotryascoma     | 0  | 0  | 0  | 0  |
| Ascomycot Sordariom Diaporthal Diaporthac Diaporthe            | 0  | 0  | 0  | 0  |
| Ascomycot Sordariom Sordariales Sordariace Neurospora          | 0  | 0  | 0  | 0  |
| Ascomycot Dothideom Capnodiale Mycospha Neoceratosperma        | 0  | 0  | 0  | 0  |
| Ascomycot Dothideom Capnodiale Teratospha Xenophacidiella      | 33 | 0  | 22 | 0  |
| Ascomycot Dothideom Capnodiale Teratosphaeriaceae              | 15 | 14 | 0  | 0  |
| Ascomycot Sordariom Diaporthal Diaporthac Diaporthe            | 0  | 0  | 0  | 0  |
| Ascomycot Pezizomyci Pezizales Pyronemat Geopora               | 0  | 0  | 0  | 0  |
| Ascomycot Sordariom Xylariales Amphispha Lepteutypa            | 0  | 0  | 0  | 0  |
| Ascomycot Dothideom Pleosporal Pleosporal Nigrograna           | 0  | 0  | 0  | 0  |
| Ascomycot Dothideom Capnodiale Teratospha Neophaeothecoidea    | 54 | 0  | 0  | 0  |
| Ascomycot Dothideom Capnodiale Teratospha Parapenidiella       | 28 | 9  | 17 | 0  |
| Ascomycot Eurotiomyci Eurotiales Aspergillac Aspergillus       | 15 | 0  | 0  | 0  |
| Ascomycota                                                     | 0  | 54 | 0  | 0  |
| Ascomycot Sordariom Diaporthal Diaporthac Diaporthe            | 0  | 0  | 0  | 0  |
| Ascomycot Sordariom Diaporthal Diaporthac Diaporthe            | 0  | 0  | 0  | 0  |
| Ascomycot Dothideom Pleosporal Teichospor Magnibotryascoma     | 33 | 12 | 0  | 0  |
| Ascomycot Sordariom Hypocreale Nectriaceae Gibberella          | 32 | 0  | 21 | 0  |
| Ascomycot Archaeorhi Archaeorhi Archaeorhi Archaeorhizomyces   | 14 | 10 | 0  | 0  |
| Ascomycot Dothideom Pleosporal Didymellac Didymella            | 0  | 28 | 0  | 0  |
| Ascomycot Sordariom Diaporthal Diaporthac Diaporthe            | 0  | 0  | 0  | 0  |
| Ascomycot Dothideom Pleosporal Didymospha Kalmusia             | 0  | 0  | 0  | 0  |
| Ascomycot Sordariom Hypocreale Hypocreale Sarocladium          | 0  | 0  | 0  | 0  |
| Ascomycot Dothideom Capnodiale Mycospha Madagascarymyces       | 0  | 0  | 0  | 0  |
| Ascomycot Dothideom Capnodiale Mycosphaerellaceae              | 0  | 0  | 0  | 0  |
| Ascomycot Sordariom Diaporthal Diaporthac Diaporthe            | 0  | 0  | 0  | 0  |
| Ascomycot Dothideom Pleosporal Massarina Helminthosporium      | 0  | 52 | 0  | 0  |
| Ascomycot Dothideom Capnodiale Mycosphaerellaceae              | 0  | 0  | 52 | 0  |
| Ascomycot Eurotiomyci Chaetothyriales                          | 0  | 0  | 29 | 0  |
| Ascomycot Dothideom Capnodiales                                | 0  | 0  | 17 | 0  |
| Ascomycot Sordariom Diaporthal Diaporthac Diaporthe            | 0  | 0  | 0  | 0  |
| Ascomycot Sordariom Glomerella Plectospha Paragibbellulopsis   | 0  | 0  | 0  | 0  |
| Ascomycot Dothideom Capnodiales                                | 0  | 0  | 0  | 0  |
| Ascomycot Eurotiomyci Phaeomon Phaeomon Xenocylindrosporium    | 0  | 0  | 0  | 0  |
| Ascomycot Dothideom Pleosporal Leptospha Leptosphaeria         | 20 | 7  | 23 | 0  |
| Ascomycot Dothideom Pleosporal Pleosporac Bipolaris yamadae    | 11 | 0  | 0  | 0  |
| Ascomycot Sordariom Diaporthal Diaporthac Diaporthe            | 0  | 5  | 0  | 17 |
| Ascomycot Sordariom Diaporthal Diaporthac Diaporthe            | 0  | 0  | 0  | 0  |
| Ascomycot Eurotiomyci Eurotiales Aspergillac Aspergillus       | 0  | 0  | 0  | 0  |
| Ascomycot Dothideom Capnodiale Teratosphaeriaceae              | 0  | 0  | 0  | 0  |
| Ascomycot Sordariom Diaporthal Diaporthac Diaporthe            | 0  | 0  | 0  | 0  |
| Ascomycota                                                     | 49 | 0  | 0  | 0  |
| Ascomycot Sordariom Hypocreale Cordycipiti Simplicillium       | 0  | 0  | 0  | 7  |
| Ascomycot Sordariom Hypocreale Hypocreales_fam_Incertae_sedis  | 0  | 0  | 0  | 0  |
| Ascomycot Sordariom Diaporthal Diaporthac Diaporthe            | 0  | 0  | 0  | 0  |
| Ascomycot Sordariom Microascae Microascae Cephalotrichum nanum | 40 | 8  | 0  | 0  |
| Ascomycot Dothideomycetes                                      | 0  | 48 | 0  | 0  |

|                                                                                   |    |    |    |    |
|-----------------------------------------------------------------------------------|----|----|----|----|
| Ascomycot Dothideomycetes Pleosporales Phaeosphaeriales Setophoma                 | 0  | 0  | 0  | 40 |
| Ascomycot Sordariomycetes Glomerella Glomerellaceae                               | 0  | 0  | 0  | 0  |
| Ascomycot Sordariomycetes Sordariales Lasiosphaeriales Schizothecium              | 41 | 0  | 6  | 0  |
| Ascomycot Sordariomycetes Diaporthales Diaporthaceae Diaporthe                    | 0  | 47 | 0  | 0  |
| Ascomycot Dothideomycetes Capnodiales Mycosphaerellaceae Zasmidium                | 0  | 0  | 47 | 0  |
| Ascomycot Dothideomycetes Capnodiales Mycosphaerellaceae                          | 0  | 0  | 0  | 0  |
| Ascomycot Dothideomycetes Pleosporales Lophiostomataceae                          | 0  | 0  | 0  | 0  |
| Ascomycot Dothideomycetes Pleosporales Pleosporaceae Curvularia intermedia        | 0  | 0  | 0  | 0  |
| Ascomycot Sordariomycetes Hypocreales Ophiocordicaceae Hirsutella                 | 0  | 0  | 0  | 0  |
| Ascomycot Dothideomycetes Pleosporales Teichosporiaceae Magnibotryascoma          | 0  | 0  | 0  | 0  |
| Ascomycot Dothideomycetes Capnodiales Mycosphaerellaceae                          | 0  | 0  | 0  | 0  |
| Ascomycot Eurotiomycetes Chaetothiales Chaetothiales Hermetothecium               | 4  | 0  | 42 | 0  |
| Ascomycot Sordariomycetes Diaporthales Diaporthaceae Diaporthe                    | 0  | 0  | 0  | 0  |
| Ascomycot Dothideomycetes Botryosphaeriales Phyllostictaceae Phyllosticta         | 0  | 0  | 0  | 0  |
| Ascomycot Sordariomycetes                                                         | 0  | 0  | 0  | 0  |
| Ascomycot Dothideomycetes Capnodiales Mycosphaerellaceae                          | 0  | 0  | 0  | 0  |
| Ascomycot Sordariomycetes Diaporthales Diaporthaceae Diaporthe                    | 0  | 0  | 0  | 0  |
| Ascomycot Dothideomycetes Pleosporales Didymellaceae                              | 45 | 0  | 0  | 0  |
| Ascomycot Dothideomycetes Capnodiales Teratosphaeriales Teratosphaericola         | 0  | 11 | 19 | 0  |
| Ascomycot Sordariomycetes Diaporthales Diaporthaceae Diaporthe                    | 0  | 0  | 0  | 0  |
| Ascomycot Dothideomycetes Capnodiales Mycosphaerellaceae                          | 0  | 0  | 0  | 0  |
| Ascomycot Sordariomycetes Glomerella Glomerella Colletotrichum                    | 0  | 0  | 0  | 0  |
| Ascomycot Eurotiomycetes Chaetothiales Chaetothiales Strelitziana                 | 0  | 0  | 0  | 0  |
| Ascomycot Dothideomycetes Pleosporales Didymosporaceae Kalmusia                   | 0  | 0  | 0  | 0  |
| Ascomycot Eurotiomycetes Eurotiales Aspergillaceae Monascus                       | 6  | 0  | 0  | 0  |
| Ascomycot Lecanoromycetes Ostropales Stictidaceae                                 | 0  | 0  | 44 | 0  |
| Ascomycot Dothideomycetes Pleosporales Pleosporaceae Curvularia                   | 0  | 0  | 0  | 0  |
| Ascomycot Sordariomycetes Trichosphaeriales Trichosphaeriales Nigrospora          | 0  | 0  | 0  | 0  |
| Ascomycot Dothideomycetes Botryosphaeriales Botryosphaeriales Neofusicoccum       | 0  | 0  | 0  | 0  |
| Ascomycot Dothideomycetes Pleosporales                                            | 0  | 0  | 0  | 0  |
| Ascomycot Dothideomycetes Capnodiales Teratosphaeriaceae                          | 43 | 0  | 0  | 0  |
| Ascomycot Sordariomycetes Sordariales Chaetomiaceae                               | 18 | 18 | 7  | 0  |
| Ascomycot Sordariomycetes Diaporthales Diaporthaceae Diaporthe                    | 0  | 43 | 0  | 0  |
| Ascomycot Eurotiomycetes Chaetothiales Trichomeriaceae Trichomerium               | 0  | 0  | 43 | 0  |
| Ascomycot Dothideomycetes Capnodiales Teratosphaeriaceae                          | 0  | 0  | 0  | 43 |
| Ascomycot Dothideomycetes Pleosporales Pleosporaceae Alternaria                   | 0  | 0  | 0  | 0  |
| Ascomycot Dothideomycetes Pleosporales Massariaceae Helminthosporium              | 0  | 0  | 0  | 0  |
| Ascomycot Dothideomycetes                                                         | 42 | 0  | 0  | 0  |
| Ascomycot Sordariomycetes Diaporthales Diaporthaceae Diaporthe                    | 0  | 0  | 0  | 0  |
| Ascomycot Eurotiomycetes Chaetothiales Herpotrichaceae Exophiala                  | 25 | 0  | 0  | 0  |
| Ascomycot Sordariomycetes Glomerella Plectosphaeriales Verticillium               | 15 | 15 | 11 | 0  |
| Ascomycot Sordariomycetes Sordariales                                             | 0  | 0  | 0  | 0  |
| Ascomycot Sordariomycetes Diaporthales Diaporthaceae Diaporthe                    | 0  | 0  | 0  | 0  |
| Ascomycot Dothideomycetes Capnodiales Teratosphaeriales Xenoteratosphaeria        | 0  | 0  | 0  | 0  |
| Ascomycot Sordariomycetes Hypocreales Hypocreaceae Acremonium                     | 0  | 0  | 0  | 0  |
| Ascomycot Sordariomycetes Hypocreales Ophiocordycitaceae                          | 0  | 0  | 0  | 0  |
| Ascomycot Sordariomycetes Xylariales Diatrypaceae Peroneutypa                     | 0  | 0  | 0  | 0  |
| Ascomycot Eurotiomycetes Chaetothiales Chaetothiales Strelitziana                 | 0  | 0  | 0  | 0  |
| Ascomycot Leotiomyces Thelebolales Pseudeurotiaceae Pseudogymnoascus              | 17 | 0  | 22 | 0  |
| Ascomycot Saccharomycetes Saccharomycetes Saccharomycetes Issatchenkia orientalis | 5  | 0  | 0  | 0  |

|                                                                 |    |    |    |    |
|-----------------------------------------------------------------|----|----|----|----|
| Ascomycot Eurotiomyi Chaetothyi Chaetothyriales_fam_Incertae_se | 0  | 11 | 28 | 0  |
| Ascomycot Sordariom Diaporthal Diaporthac Diaporthe             | 0  | 0  | 0  | 0  |
| Ascomycot Sordariomycetes                                       | 0  | 0  | 0  | 0  |
| Ascomycot Dothideom Capnodiale Cladospori Cladosporium          | 0  | 0  | 0  | 0  |
| Ascomycot Dothideom Capnodiale Teratosphz Neophaeothecoidea     | 0  | 0  | 0  | 0  |
| Ascomycot Dothideom Capnodiale Teratosphaeriaceae               | 0  | 0  | 0  | 0  |
| Ascomycot Eurotiomyi Eurotiales Aspergillaceae                  | 0  | 0  | 0  | 0  |
| Ascomycot Dothideom Capnodiale Mycosphaerellaceae               | 0  | 0  | 0  | 0  |
| Ascomycot Sordariom Trichospha Trichospha Nigrospora            | 38 | 0  | 0  | 0  |
| Ascomycot Sordariom Sordariales Chaetomia Humicola              | 12 | 0  | 0  | 0  |
| Ascomycot Sordariom Chaetosph Chaetosphaeriaceae                | 0  | 0  | 0  | 35 |
| Ascomycot Sordariom Diaporthal Diaporthac Diaporthe             | 0  | 0  | 0  | 0  |
| Ascomycot Eurotiomyi Eurotiales Trichocom Talaromyces           | 0  | 0  | 0  | 0  |
| Ascomycot Sordariom Chaetosph Chaetosph Thozetella              | 0  | 0  | 0  | 0  |
| Ascomycot Eurotiomyi Chaetothyriales                            | 0  | 0  | 0  | 0  |
| Ascomycot Dothideom Pleosporales                                | 0  | 0  | 0  | 0  |
| Ascomycot Dothideom Capnodiale Mycosphaerellaceae               | 0  | 0  | 0  | 0  |
| Ascomycot Dothideom Capnodiale Mycosphaerellaceae               | 0  | 0  | 0  | 0  |
| Ascomycot Eurotiomyi Chaetothyi Chaetothyi Strelitziana         | 0  | 0  | 0  | 0  |
| Ascomycot Eurotiomyi Eurotiales Trichocom Talaromyces           | 37 | 0  | 0  | 0  |
| Ascomycot Eurotiomyi Eurotiales Aspergillac Aspergillus         | 25 | 0  | 0  | 0  |
| Ascomycot Sordariom Sordariales Chaetomia Botryotrichum         | 20 | 0  | 17 | 0  |
| Ascomycot Dothideom Pleosporales                                | 10 | 0  | 13 | 0  |
| Ascomycot Sordariom Xylariales Xylariaceae Hypoxylon            | 0  | 14 | 0  | 0  |
| Ascomycot Eurotiomyi Chaetothyi Herpotrich Veronaea             | 0  | 0  | 0  | 31 |
| Ascomycota                                                      | 0  | 0  | 0  | 0  |
| Ascomycot Sordariom Diaporthal Diaporthac Diaporthe             | 0  | 0  | 0  | 0  |
| Ascomycot Dothideom Pleosporal Didymellac Didymella             | 0  | 0  | 0  | 0  |
| Ascomycot Leotiomyi Helotiales Hyaloscypt Proliferodiscus       | 0  | 0  | 0  | 0  |
| Ascomycot Dothideom Pleosporales                                | 0  | 0  | 0  | 0  |
| Ascomycot Dothideom Capnodiale Mycosphae Geastrumia             | 15 | 0  | 21 | 0  |
| Ascomycota                                                      | 0  | 36 | 0  | 0  |
| Ascomycot Saccharom Saccharom Debaryom Meyerozyma               | 0  | 7  | 7  | 0  |
| Ascomycot Sordariom Hypocreale Nectriacea Fusarium              | 0  | 0  | 0  | 0  |
| Ascomycot Sordariom Chaetosph Chaetosphaeriaceae                | 0  | 0  | 0  | 0  |
| Ascomycot Eurotiomyi Phaeomon Phaeomon Neophaeomoniella         | 0  | 0  | 0  | 0  |
| Ascomycot Dothideom Capnodiale Dissoconia Uwebraunia            | 0  | 0  | 0  | 0  |
| Ascomycot Sordariom Hypocreale Bionectriac Clonostach sp        | 35 | 0  | 0  | 0  |
| Ascomycot Dothideom Pleosporales                                | 23 | 12 | 0  | 0  |
| Ascomycot Sordariom Hypocreale Nectriaceae                      | 15 | 7  | 7  | 0  |
| Ascomycot Eurotiomyi Chaetothyi Chaetothyi Strelitziana         | 0  | 20 | 15 | 0  |
| Ascomycot Dothideom Capnodiale Schizothyri Johansonia           | 0  | 0  | 35 | 0  |
| Ascomycot Dothideom Capnodiale Teratosphz Xenopenidiella        | 0  | 0  | 0  | 0  |
| Ascomycot Eurotiomyi Eurotiales Aspergillac Aspergillus         | 0  | 0  | 0  | 0  |
| Ascomycot Dothideom Capnodiale Teratosphz Lapidomyces           | 0  | 0  | 0  | 0  |
| Ascomycot Dothideom Capnodiales                                 | 30 | 0  | 4  | 0  |
| Ascomycota                                                      | 0  | 34 | 0  | 0  |
| Ascomycot Dothideom Capnodiales                                 | 0  | 0  | 34 | 0  |
| Ascomycot Sordariom Diaporthal Diaporthac Diaporthe             | 0  | 0  | 0  | 0  |
| Ascomycot Eurotiomyi Onygenale Onygenale Zeloasperisporium      | 0  | 0  | 0  | 0  |

|                                                                           |    |    |    |   |
|---------------------------------------------------------------------------|----|----|----|---|
| Ascomycot Dothideomycetes Dothideomycetes Radulidiales                    | 19 | 0  | 14 | 0 |
| Ascomycot Dothideomycetes Pleosporales Teichosporales Magnibotryascomae   | 0  | 33 | 0  | 0 |
| Ascomycot Dothideomycetes                                                 | 0  | 33 | 0  | 0 |
| Ascomycot Sordariomycetes Xylariales                                      | 0  | 8  | 0  | 0 |
| Ascomycot Dothideomycetes Pleosporales Phaeosphaerales Phaeosphaeria      | 0  | 0  | 0  | 0 |
| Ascomycot Sordariomycetes Xylariales Xylariaceae Muscodor                 | 0  | 0  | 0  | 0 |
| Ascomycot Dothideomycetes Capnodiales Teratosphaeriaceae                  | 0  | 0  | 0  | 0 |
| Ascomycot Dothideomycetes Capnodiales                                     | 0  | 0  | 0  | 0 |
| Ascomycot Sordariomycetes Diaporthales Diaporthaceae Diaporthe            | 0  | 0  | 0  | 0 |
| Ascomycot Dothideomycetes Capnodiales Teratosphaerales Xenoteratosphaeria | 32 | 0  | 0  | 0 |
| Ascomycot Dothideomycetes Capnodiales Mycosphaerellaceae                  | 32 | 0  | 0  | 0 |
| Ascomycot Eurotiomycetes Chaetothyriales                                  | 32 | 0  | 0  | 0 |
| Ascomycot Sordariomycetes Sordariales Lasiosphaeriaceae                   | 28 | 0  | 0  | 0 |
| Ascomycot Dothideomycetes Capnodiales Mycosphaerales Geastrumia           | 0  | 32 | 0  | 0 |
| Ascomycot Sordariomycetes Hypocreales Clavicipitaceae                     | 0  | 0  | 0  | 0 |
| Ascomycot Sordariomycetes Xylariales Xylariaceae Muscodor                 | 0  | 0  | 0  | 0 |
| Ascomycot Sordariomycetes Hypocreales Hypocreaceae Trichoderma            | 0  | 0  | 0  | 0 |
| Ascomycot Eurotiomycetes Eurotiales Aspergillaceae Penicillium            | 0  | 0  | 0  | 0 |
| Ascomycot Dothideomycetes Pleosporales Phaeosphaerales Phaeosphaeria      | 0  | 0  | 0  | 0 |
| Ascomycot Dothideomycetes Capnodiales Teratosphaerales Xenoteratosphaeria | 0  | 0  | 0  | 0 |
| Ascomycot Sordariomycetes Glomerella Plectosphaera Lectera                | 0  | 31 | 0  | 0 |
| Ascomycot Sordariomycetes Diaporthales Diaporthaceae                      | 0  | 0  | 0  | 0 |
| Ascomycot Leotiomyces Erysiphales Erysiphaceae Blumeria                   | 0  | 0  | 0  | 0 |
| Ascomycot Dothideomycetes Capnodiales                                     | 0  | 0  | 0  | 0 |
| Ascomycot Sordariomycetes Diaporthales Diaporthaceae Diaporthe            | 0  | 0  | 0  | 0 |
| Ascomycot Eurotiomycetes Eurotiales Trichocomma Talaromyces               | 0  | 30 | 0  | 0 |
| Ascomycot Dothideomycetes Pleosporales Didymellaceae Nothophoma           | 0  | 30 | 0  | 0 |
| Ascomycot Dothideomycetes Dothideales Aureobasiales Aureobasidium         | 0  | 11 | 0  | 0 |
| Ascomycot Sordariomycetes Diaporthales Diaporthaceae Diaporthe            | 0  | 0  | 0  | 0 |
| Ascomycot Dothideomycetes Capnodiales Teratosphaerales Xenoteratosphaeria | 0  | 0  | 0  | 0 |
| Ascomycot Dothideomycetes Capnodiales Cladosporiales Cladosporium         | 0  | 0  | 0  | 0 |
| Ascomycot Dothideomycetes Capnodiales Mycosphaerales Ramularia            | 0  | 0  | 0  | 0 |
| Ascomycot Dothideomycetes Dothideomycetes Dothideomycetes Radulidiales    | 0  | 0  | 0  | 0 |
| Ascomycot Sordariomycetes Chaetosphaerales Chaetosphaerales Dendrophoma   | 0  | 0  | 0  | 0 |
| Ascomycot Pezizomycetes Pezizales Ascodesmiales Cephalopora sp            | 14 | 10 | 5  | 0 |
| Ascomycot Dothideomycetes                                                 | 0  | 0  | 29 | 0 |
| Ascomycot Dothideomycetes Capnodiales Teratosphaeriaceae                  | 0  | 0  | 29 | 0 |
| Ascomycot Sordariomycetes Glomerella Glomerella Colletotrichum            | 0  | 0  | 0  | 0 |
| Ascomycot Sordariomycetes Diaporthales Diaporthaceae Diaporthe            | 0  | 0  | 0  | 0 |
| Ascomycot Dothideomycetes Capnodiales Cladosporiales Cladosporium         | 0  | 0  | 0  | 0 |
| Ascomycot Dothideomycetes Pleosporales Didymellaceae Neoascochyta         | 0  | 0  | 0  | 0 |
| Ascomycot Dothideomycetes Capnodiales Mycosphaerellaceae                  | 0  | 0  | 0  | 0 |
| Ascomycot Dothideomycetes Pleosporales Coniothyriaceae                    | 0  | 0  | 0  | 0 |
| Ascomycot Dothideomycetes Pleosporales Didymosphaerales Pseudopithomyces  | 0  | 0  | 0  | 0 |
| Ascomycot Leotiomyces Helotiales Dermateaceae Pezicula                    | 0  | 0  | 0  | 0 |
| Ascomycot Sordariomycetes Glomerella Glomerella Colletotrichum conoides   | 0  | 0  | 0  | 0 |
| Ascomycot Sordariomycetes Hypocreales Stachybotrys Paramyrothecium        | 23 | 5  | 0  | 0 |
| Ascomycot Dothideomycetes Pleosporales Didymellaceae Epicoccum            | 0  | 28 | 0  | 0 |
| Ascomycot Eurotiomycetes Chaetothyriales Trichomeria Trichomerium         | 0  | 26 | 0  | 0 |
| Ascomycot Eurotiomycetes Phaeomonas Phaeomonas Neophaeomonella            | 0  | 0  | 28 | 0 |

|                                                                          |    |    |    |   |
|--------------------------------------------------------------------------|----|----|----|---|
| Ascomycot Lecanoromycetes Ostropales Gomphillaceae Corticifraga          | 0  | 0  | 28 | 0 |
| Ascomycot Dothideomycetes Pleosporales Pleosporaceae Curvularia          | 0  | 0  | 0  | 0 |
| Ascomycot Dothideomycetes Capnodiales Teratosphaeriaceae                 | 0  | 0  | 0  | 0 |
| Ascomycot Sordariomycetes Hypocreales Stachybotrys Paramyrothecium       | 0  | 0  | 0  | 0 |
| Ascomycot Sordariomycetes Diaporthales Diaporthaceae Diaporthe           | 0  | 0  | 0  | 0 |
| Ascomycot Dothideomycetes Pleosporales Didymosporales Kalmusia           | 0  | 0  | 0  | 0 |
| Ascomycot Dothideomycetes Capnodiales Capnodiales Pseudoramichloridium   | 0  | 0  | 0  | 0 |
| Ascomycot Eurotiomycetes Eurotiales Aspergillaceae Monascus              | 0  | 0  | 0  | 0 |
| Ascomycot Eurotiomycetes Chaetothiales Chaetothiales Strelitziana        | 27 | 0  | 0  | 0 |
| Ascomycot Dothideomycetes Capnodiales                                    | 27 | 0  | 0  | 0 |
| Ascomycot Sordariomycetes Magnaporales Magnaporales Arxiella             | 13 | 0  | 14 | 0 |
| Ascomycot Eurotiomycetes Chaetothiales Chaetothiales Hermetothecium      | 10 | 0  | 15 | 0 |
| Ascomycot Dothideomycetes Myriangiales                                   | 0  | 27 | 0  | 0 |
| Ascomycota                                                               | 0  | 27 | 0  | 0 |
| Ascomycot Dothideomycetes Capnodiales Teratosphaeraceae Parapenidiella   | 0  | 0  | 0  | 0 |
| Ascomycot Dothideomycetes Capnodiales Mycosphaerellaceae                 | 0  | 0  | 0  | 0 |
| Ascomycot Dothideomycetes Capnodiales Teratosphaeraceae Penidiella       | 0  | 0  | 0  | 0 |
| Ascomycot Dothideomycetes Pleosporales                                   | 0  | 0  | 0  | 0 |
| Ascomycot Dothideomycetes Capnodiales                                    | 0  | 0  | 0  | 0 |
| Ascomycot Dothideomycetes Pleosporales Didymosporales Pseudopithomyces   | 0  | 0  | 0  | 0 |
| Ascomycot Dothideomycetes Capnodiales Mycosphaerellaceae                 | 0  | 0  | 0  | 0 |
| Ascomycot Dothideomycetes Tubeufiales Tubeufiaceae                       | 0  | 0  | 0  | 0 |
| Ascomycot Eurotiomycetes Chaetothiales Trichomeri Brycekendrickomyces    | 0  | 0  | 0  | 0 |
| Ascomycot Pezizomycetes Pezizales Ascodesmaceae Cephalophora             | 26 | 0  | 0  | 0 |
| Ascomycot Sordariomycetes Hypocreales Nectriaceae Fusicolla              | 26 | 0  | 0  | 0 |
| Ascomycot Archaeorhizomycetes Archaeorhizomycetes Archaeorhizomycetes    | 9  | 17 | 0  | 0 |
| Ascomycot Eurotiomycetes Chaetothiales Trichomeri Trichomerium           | 0  | 0  | 26 | 0 |
| Ascomycot Eurotiomycetes Chaetothiales Trichomeri Trichomerium           | 0  | 0  | 26 | 0 |
| Ascomycot Dothideomycetes Pleosporales Cucurbitaria Pyrenochaeta         | 0  | 0  | 0  | 0 |
| Ascomycot Sordariomycetes Diaporthales Diaporthaceae Diaporthe           | 0  | 0  | 0  | 0 |
| Ascomycot Dothideomycetes Capnodiales Mycosphaerellaceae                 | 0  | 0  | 0  | 0 |
| Ascomycot Dothideomycetes Pleosporales Didymellaceae Stagonosporopsis    | 0  | 0  | 0  | 0 |
| Ascomycot Dothideomycetes Capnodiales                                    | 0  | 0  | 0  | 0 |
| Ascomycot Dothideomycetes Capnodiales Mycosphaerellaceae                 | 0  | 0  | 0  | 0 |
| Ascomycot Sordariomycetes Hypocreales Nectriaceae Neocosmospora          | 0  | 0  | 0  | 0 |
| Ascomycot Dothideomycetes Pleosporales Didymellaceae                     | 0  | 0  | 0  | 0 |
| Ascomycot Dothideomycetes Pleosporales Didymosporales Pseudopithomyces   | 0  | 0  | 0  | 0 |
| Ascomycot Dothideomycetes Asterinales Morenoinae Morenoina               | 0  | 0  | 0  | 0 |
| Ascomycot Dothideomycetes Capnodiales Mycosphaeraceae Paramycosphaerella | 0  | 25 | 0  | 0 |
| Ascomycot Dothideomycetes Pleosporales Torulaceae Dendryphon             | 0  | 25 | 0  | 0 |
| Ascomycot Dothideomycetes Capnodiales Teratosphaeriaceae                 | 0  | 25 | 0  | 0 |
| Ascomycot Eurotiomycetes Chaetothiales Chaetothiales Chaetothyrium       | 0  | 0  | 25 | 0 |
| Ascomycot Dothideomycetes Capnodiales Teratosphaeriaceae                 | 0  | 0  | 25 | 0 |
| Ascomycot Dothideomycetes Pleosporales Phaeosphaeraceae Setophoma        | 0  | 0  | 11 | 0 |
| Ascomycot Dothideomycetes Capnodiales Mycosphaeraceae Phaeophleospora    | 0  | 0  | 0  | 0 |
| Ascomycot Sordariomycetes Sordariales Chaetomiaceae                      | 0  | 0  | 0  | 0 |
| Ascomycot Eurotiomycetes Eurotiales Aspergillaceae Aspergillus           | 0  | 0  | 0  | 0 |
| Ascomycot Dothideomycetes Pleosporales Didymellaceae Didymella           | 0  | 0  | 0  | 0 |
| Ascomycot Sordariomycetes                                                | 0  | 0  | 0  | 0 |
| Ascomycot Dothideomycetes Capnodiales Mycosphaeraceae Zasmidium          | 0  | 0  | 0  | 0 |

|                                                                 |    |    |    |    |
|-----------------------------------------------------------------|----|----|----|----|
| Ascomycot Dothideomr Capnodiales                                | 0  | 0  | 0  | 0  |
| Ascomycot Sordariomr Diaporthalr Diaporthac Diaporthe           | 0  | 0  | 0  | 0  |
| Ascomycot Dothideomr Pleosporalr Phaeospha Setophoma            | 14 | 10 | 0  | 0  |
| Ascomycot Eurotiomyr Onygenale Onygenace Polytolypa             | 0  | 15 | 9  | 0  |
| Ascomycot Sordariomr Hypocreale Hypocreale Emericellopsis       | 0  | 8  | 5  | 0  |
| Ascomycot Dothideomr Capnodiale Teratosphaeriaceae              | 0  | 0  | 24 | 0  |
| Ascomycot Eurotiomyr Eurotiales Aspergillac Aspergillus         | 0  | 0  | 0  | 0  |
| Ascomycot Sordariomr Diaporthalr Diaporthac Diaporthe           | 0  | 0  | 0  | 0  |
| Ascomycot Sordariomr Branch06                                   | 0  | 0  | 0  | 0  |
| Ascomycot Saccharomr Saccharomycetales                          | 0  | 0  | 0  | 0  |
| Ascomycot Dothideomr Capnodiale Cladospori Cladosporium         | 0  | 0  | 0  | 0  |
| Ascomycot Dothideomr Pleosporalr Lophiotren Atrocalyx           | 0  | 0  | 0  | 0  |
| Ascomycot Dothideomr Capnodiale Teratosphz Xenopenidiella       | 0  | 0  | 0  | 0  |
| Ascomycot Leotiomyr Thelebolalr Pseudeuro Pseudogymnoascus      | 23 | 0  | 0  | 0  |
| Ascomycot Dothideomr Capnodiale Mycosphae Zasmidium             | 23 | 0  | 0  | 0  |
| Ascomycot Sordariomr Sordariales Chaetomia Retroconis           | 11 | 0  | 12 | 0  |
| Ascomycot Eurotiomyr Chaetothyr Chaetothyr Hermetothecium       | 0  | 0  | 23 | 0  |
| Ascomycot Dothideomr Pleosporalr Didymellac Allophoma           | 0  | 0  | 10 | 0  |
| Ascomycot Dothideomr Pleosporalr Pleosporac Alternaria          | 0  | 0  | 0  | 0  |
| Ascomycot Leotiomyr Thelebolalr Pseudeuro Pseudeurotium         | 0  | 0  | 0  | 0  |
| Ascomycot Dothideomr Capnodiale Mycosphae Ramularia             | 0  | 0  | 0  | 0  |
| Ascomycot Eurotiomyr Eurotiales Aspergillac Penicillium         | 0  | 0  | 0  | 0  |
| Ascomycot Dothideomr Capnodiale Teratosphz Devriesia            | 0  | 0  | 0  | 0  |
| Ascomycota                                                      | 0  | 0  | 0  | 0  |
| Ascomycot Eurotiomyr Onygenale Onygenale Zeloasperisporium      | 0  | 0  | 0  | 0  |
| Ascomycot Eurotiomyr Eurotiales Aspergillac Penicillium         | 0  | 0  | 0  | 0  |
| Ascomycota                                                      | 0  | 0  | 0  | 0  |
| Ascomycot Dothideomr Venturiale: Sympovenr Neocoleroa           | 22 | 0  | 0  | 0  |
| Ascomycot Dothideomr Pleosporalr Thyridariac Roussoella         | 0  | 17 | 5  | 0  |
| Ascomycot Dothideomr Capnodiale Mycosphae Pseudozasmidium       | 0  | 0  | 0  | 22 |
| Ascomycot Dothideomr Capnodiale Teratosphaeriaceae              | 0  | 0  | 0  | 0  |
| Ascomycot Sordariomr Diaporthalr Diaporthac Diaporthe           | 0  | 0  | 0  | 0  |
| Ascomycot Dothideomr Pleosporalr Pleosporac Alternaria          | 0  | 0  | 0  | 0  |
| Ascomycot Dothideomr Capnodiale Teratosphz Parateratosphaeria   | 0  | 0  | 0  | 0  |
| Ascomycot Eurotiomyr Eurotiales Trichocom Talaromyces           | 0  | 0  | 0  | 0  |
| Ascomycot Dothideomr Pleosporalr Pleosporac Curvularia buchloes | 0  | 0  | 0  | 0  |
| Ascomycot Eurotiomyr Phaeomon Phaeomon Neophaeomoniella         | 0  | 0  | 0  | 0  |
| Ascomycot Sordariomr Glomerella Glomerellaceae                  | 0  | 0  | 0  | 0  |
| Ascomycot Leotiomyr Helotiales Hyaloscyph Crucellisporiopsis    | 21 | 0  | 0  | 0  |
| Ascomycot Sordariomycetes                                       | 8  | 0  | 13 | 0  |
| Ascomycot Sordariomr Xylariales Amphisphaeriaceae               | 4  | 17 | 0  | 0  |
| Ascomycota                                                      | 0  | 21 | 0  | 0  |
| Ascomycot Sordariomycetes                                       | 0  | 12 | 0  | 0  |
| Ascomycot Dothideomr Venturiale: Sympovenr Neocoleroa           | 0  | 0  | 21 | 0  |
| Ascomycot Dothideomr Capnodiale Mycosphaerellaceae              | 0  | 0  | 21 | 0  |
| Ascomycot Lecanoromycetes                                       | 0  | 0  | 0  | 0  |
| Ascomycot Dothideomr Pleosporalr Teichospor Teichospora         | 0  | 0  | 0  | 0  |
| Ascomycot Dothideomr Capnodiale Mycosphae Septoria              | 0  | 0  | 0  | 0  |
| Ascomycot Sordariomr Diaporthales                               | 0  | 0  | 0  | 0  |
| Ascomycot Dothideomr Capnodiale Mycosphae Phaeophleospora       | 0  | 0  | 0  | 0  |



|                                                                                                      |    |    |    |   |
|------------------------------------------------------------------------------------------------------|----|----|----|---|
| Ascomycot Sordariom <sup>†</sup> Diaporthal <sup>†</sup> Diaporthac <sup>†</sup> Diaporthe           | 0  | 0  | 0  | 0 |
| Ascomycot Sordariom <sup>†</sup> Diaporthal <sup>†</sup> Diaporthac <sup>†</sup> Diaporthe           | 0  | 0  | 0  | 0 |
| Ascomycot Dothideom <sup>†</sup> Pleosporal <sup>†</sup> Pleosporac <sup>†</sup> Alternaria          | 0  | 0  | 0  | 0 |
| Ascomycot Dothideom <sup>†</sup> Capnodiale <sup>†</sup> Teratosph <sup>†</sup> Catenulostroma       | 0  | 0  | 0  | 0 |
| Ascomycot Dothideom <sup>†</sup> Capnodiale <sup>†</sup> Mycospha <sup>†</sup> Zasmidium             | 0  | 0  | 0  | 0 |
| Ascomycot Dothideom <sup>†</sup> Pleosporal <sup>†</sup> Didymellaceae                               | 0  | 0  | 0  | 0 |
| Ascomycot Dothideom <sup>†</sup> Capnodiale <sup>†</sup> Teratosph <sup>†</sup> Devriesia            | 0  | 0  | 0  | 0 |
| Ascomycot Sordariom <sup>†</sup> Sordariales <sup>†</sup> Lasiosphaeriaceae                          | 0  | 0  | 0  | 0 |
| Ascomycota                                                                                           | 0  | 0  | 0  | 0 |
| Ascomycot Sordariom <sup>†</sup> Togniniales <sup>†</sup> Togniniace <sup>†</sup> Phaeoacremonium    | 0  | 0  | 0  | 0 |
| Ascomycot Sordariom <sup>†</sup> Diaporthal <sup>†</sup> Diaporthac <sup>†</sup> Diaporthe           | 20 | 0  | 0  | 0 |
| Ascomycot Dothideom <sup>†</sup> Pleosporal <sup>†</sup> Phaeospha <sup>†</sup> Ophiosphaerella      | 14 | 6  | 0  | 0 |
| Ascomycot Sordariom <sup>†</sup> Hypocreale <sup>†</sup> Clavicipitaceae                             | 8  | 12 | 0  | 0 |
| Ascomycot Pezizomyc <sup>†</sup> Pezizales <sup>†</sup> Pezizaceae <sup>†</sup> Iodophanus           | 0  | 20 | 0  | 0 |
| Ascomycot Sordariom <sup>†</sup> Diaporthal <sup>†</sup> Valsaceae <sup>†</sup> Cytospora            | 0  | 16 | 4  | 0 |
| Ascomycot Dothideomycetes                                                                            | 0  | 0  | 20 | 0 |
| Ascomycot Sordariom <sup>†</sup> Diaporthal <sup>†</sup> Diaporthac <sup>†</sup> Diaporthe           | 0  | 0  | 0  | 0 |
| Ascomycot Pezizomyc <sup>†</sup> Pezizales <sup>†</sup> Pyronemat <sup>†</sup> Geopora               | 0  | 0  | 0  | 0 |
| Ascomycota                                                                                           | 0  | 0  | 0  | 0 |
| Ascomycot Eurotiomyc <sup>†</sup> Phaeomon <sup>†</sup> Phaeomon <sup>†</sup> Xenocylindrosporium    | 0  | 0  | 0  | 0 |
| Ascomycot Sordariom <sup>†</sup> Xylariales <sup>†</sup> Amphisphe <sup>†</sup> Amphisphaeria        | 0  | 0  | 0  | 0 |
| Ascomycot Sordariomycetes                                                                            | 0  | 0  | 0  | 0 |
| Ascomycot Dothideom <sup>†</sup> Capnodiales                                                         | 0  | 0  | 0  | 0 |
| Ascomycot Dothideom <sup>†</sup> Dothideom <sup>†</sup> Eremomyc <sup>†</sup> Arthrographis          | 0  | 0  | 0  | 0 |
| Ascomycot Leotiomyce <sup>†</sup> Helotiales <sup>†</sup> Hyaloscyph <sup>†</sup> Crucellisporiopsis | 0  | 0  | 0  | 0 |
| Ascomycot Dothideom <sup>†</sup> Capnodiale <sup>†</sup> Teratosph <sup>†</sup> Xenoteratosphaeria   | 0  | 0  | 0  | 0 |
| Ascomycot Dothideom <sup>†</sup> Capnodiale <sup>†</sup> Teratosphaeriaceae                          | 19 | 0  | 0  | 0 |
| Ascomycot Sordariom <sup>†</sup> Hypocreale <sup>†</sup> Cordycipit <sup>†</sup> Lecanicillium       | 19 | 0  | 0  | 0 |
| Ascomycot Dothideom <sup>†</sup> Capnodiales                                                         | 19 | 0  | 0  | 0 |
| Ascomycot Sordariom <sup>†</sup> Hypocreale <sup>†</sup> Nectriaceae <sup>†</sup> Stephanonectria    | 13 | 6  | 0  | 0 |
| Ascomycot Sordariom <sup>†</sup> Sordariales <sup>†</sup> Sordariaceae <sup>†</sup> Gelasinospora    | 0  | 19 | 0  | 0 |
| Ascomycot Dothideom <sup>†</sup> Capnodiales                                                         | 0  | 19 | 0  | 0 |
| Ascomycot Saccharom <sup>†</sup> Saccharom <sup>†</sup> Phaffomyc <sup>†</sup> Wickerhamomyces       | 0  | 9  | 0  | 0 |
| Ascomycot Dothideom <sup>†</sup> Capnodiale <sup>†</sup> Teratosphaeriaceae                          | 0  | 0  | 19 | 0 |
| Ascomycot Dothideom <sup>†</sup> Pleosporal <sup>†</sup> Didymellac <sup>†</sup> Boeremia            | 0  | 0  | 0  | 0 |
| Ascomycot Dothideom <sup>†</sup> Pleosporal <sup>†</sup> Coniothyri <sup>†</sup> Coniothyrium        | 0  | 0  | 0  | 0 |
| Ascomycot Dothideom <sup>†</sup> Capnodiale <sup>†</sup> Teratosph <sup>†</sup> Xenoteratosphaeria   | 0  | 0  | 0  | 0 |
| Ascomycot Dothideomycetes                                                                            | 0  | 0  | 0  | 0 |
| Ascomycot Dothideom <sup>†</sup> Capnodiales                                                         | 0  | 0  | 0  | 0 |
| Ascomycot Dothideom <sup>†</sup> Capnodiale <sup>†</sup> Mycosphaerellaceae                          | 0  | 0  | 0  | 0 |
| Ascomycot Sordariom <sup>†</sup> Hypocreale <sup>†</sup> Hypocreale <sup>†</sup> Acremonium          | 0  | 0  | 0  | 0 |
| Ascomycot Dothideom <sup>†</sup> Capnodiale <sup>†</sup> Cladospori <sup>†</sup> Cladosporium        | 0  | 0  | 0  | 0 |
| Ascomycot Dothideom <sup>†</sup> Pleosporal <sup>†</sup> Didymellaceae                               | 0  | 0  | 0  | 0 |
| Ascomycot Dothideom <sup>†</sup> Pleosporal <sup>†</sup> Cucurbitari <sup>†</sup> Pyrenochaetopsis   | 0  | 0  | 0  | 0 |
| Ascomycot Dothideom <sup>†</sup> Pleosporal <sup>†</sup> Dictyospor <sup>†</sup> Pseudocoleophoma    | 0  | 0  | 0  | 0 |
| Ascomycot Dothideom <sup>†</sup> Capnodiale <sup>†</sup> Teratosph <sup>†</sup> Hyweljonesia         | 0  | 0  | 0  | 0 |
| Ascomycot Sordariom <sup>†</sup> Sordariales <sup>†</sup> Chaetomiaceae                              | 18 | 0  | 0  | 0 |
| Ascomycot Dothideom <sup>†</sup> Pleosporales                                                        | 13 | 0  | 5  | 0 |
| Ascomycot Eurotiomyce <sup>†</sup> Chaetothy <sup>†</sup> Chaetothy <sup>†</sup> Strelitziana        | 0  | 18 | 0  | 0 |
| Ascomycot Dothideom <sup>†</sup> Capnodiale <sup>†</sup> Teratosphaeriaceae                          | 0  | 18 | 0  | 0 |

|                                                                             |    |    |    |    |
|-----------------------------------------------------------------------------|----|----|----|----|
| Ascomycot Leotiomyci Helotiales                                             | 0  | 4  | 0  | 0  |
| Ascomycot Dothideomycetes Capnodiales                                       | 0  | 0  | 18 | 0  |
| Ascomycot Dothideomycetes                                                   | 0  | 0  | 18 | 0  |
| Ascomycot Dothideomycetes Capnodiales                                       | 0  | 0  | 18 | 0  |
| Ascomycot Eurotiomycetes Chaetothyriales Chaetothyriales Strelitziana       | 0  | 0  | 18 | 0  |
| Ascomycot Dothideomycetes Capnodiales Mycosphaerella Madagascariomyces      | 0  | 0  | 0  | 0  |
| Ascomycot Lecanoromycetes Ostropales Graphidaceae Leiorreuma                | 0  | 0  | 0  | 0  |
| Ascomycot Dothideomycetes Venturiales Symplocosphaera Ochroconis            | 0  | 0  | 0  | 0  |
| Ascomycot Sordariomycetes Diaporthales Diaporthaceae Diaporthe              | 0  | 0  | 0  | 0  |
| Ascomycot Dothideomycetes Capnodiales Teratosphaeria Xenoteratosphaeria     | 0  | 0  | 0  | 0  |
| Ascomycot Sordariomycetes Hypocreales Nectriaceae Ilyonectria               | 0  | 0  | 0  | 0  |
| Ascomycot Sordariomycetes Chaetosphaeriales Chaetosphaeriaceae              | 0  | 0  | 0  | 0  |
| Ascomycot Sordariomycetes Diaporthales Diaporthaceae Diaporthe              | 0  | 0  | 0  | 0  |
| Ascomycot Dothideomycetes Pleosporales Periconiaceae Periconia              | 0  | 0  | 0  | 0  |
| Ascomycota                                                                  | 0  | 0  | 0  | 0  |
| Ascomycot Dothideomycetes Pleosporales Didymellaceae Didymella              | 0  | 0  | 0  | 0  |
| Ascomycot Sordariomycetes Hypocreales Nectriaceae Neocosmospora             | 0  | 0  | 0  | 0  |
| Ascomycot Dothideomycetes Capnodiales Mycosphaerella Exopassalora           | 0  | 0  | 0  | 0  |
| Ascomycot Eurotiomycetes Chaetothyriales                                    | 0  | 0  | 0  | 0  |
| Ascomycot Sordariomycetes                                                   | 0  | 0  | 0  | 0  |
| Ascomycot Dothideomycetes Pleosporales Didymellaceae Epicoccum              | 0  | 0  | 0  | 0  |
| Ascomycota                                                                  | 0  | 0  | 0  | 0  |
| Ascomycot Eurotiomycetes Eurotiales Trichocomycetes Talaromyces             | 0  | 0  | 0  | 0  |
| Ascomycot Dothideomycetes Tubeufiales Tubeufiaceae                          | 0  | 0  | 0  | 0  |
| Ascomycot Sordariomycetes Diaporthales Diaporthaceae Diaporthe              | 0  | 0  | 0  | 0  |
| Ascomycot Dothideomycetes Capnodiales Teratosphaeriaceae                    | 17 | 0  | 0  | 0  |
| Ascomycot Eurotiomycetes Chaetothyriales Chaetothyriales Strelitziana       | 17 | 0  | 0  | 0  |
| Ascomycot Eurotiomycetes Onygenales Onygenaceae Polytolypa                  | 17 | 0  | 0  | 0  |
| Ascomycot Dothideomycetes Pleosporales Morosphaeria Acrocalymma             | 15 | 0  | 0  | 0  |
| Ascomycot Sordariomycetes Hypocreales                                       | 9  | 0  | 8  | 0  |
| Ascomycot Dothideomycetes Capnodiales                                       | 0  | 17 | 0  | 0  |
| Ascomycot Orbiliomycetes Orbiliales                                         | 0  | 17 | 0  | 0  |
| Ascomycot Dothideomycetes Capnodiales                                       | 0  | 3  | 14 | 0  |
| Ascomycot Eurotiomycetes Chaetothyriales                                    | 0  | 0  | 17 | 0  |
| Ascomycot Dothideomycetes                                                   | 0  | 0  | 17 | 0  |
| Ascomycot Dothideomycetes Capnodiales                                       | 0  | 0  | 17 | 0  |
| Ascomycot Sordariomycetes Microascales Microascale Gamsia                   | 0  | 0  | 17 | 0  |
| Ascomycot Sordariomycetes Chaetosphaeriales                                 | 0  | 0  | 0  | 17 |
| Ascomycot Dothideomycetes Capnodiales Teratosphaeria Xenoteratosphaeria     | 0  | 0  | 0  | 0  |
| Ascomycot Dothideomycetes Capnodiales                                       | 0  | 0  | 0  | 0  |
| Ascomycot Sordariomycetes Hypocreales Nectriaceae Volutella                 | 0  | 0  | 0  | 0  |
| Ascomycot Leotiomyci Helotiales Helotiaceae Scytalidium                     | 0  | 0  | 0  | 0  |
| Ascomycot Dothideomycetes Capnodiales Neodevriesia Neodevriesia             | 0  | 0  | 0  | 0  |
| Ascomycot Leotiomyci Erysiphales Erysiphaceae Microsphaera                  | 0  | 0  | 0  | 0  |
| Ascomycot Eurotiomycetes Eurotiales Trichocomycetes Thermomyces lanuginosus | 0  | 0  | 0  | 0  |
| Ascomycot Eurotiomycetes Chaetothyriales Herpotrichum Exophiala             | 0  | 0  | 0  | 0  |
| Ascomycot Dothideomycetes Pleosporales Sporormiella Preussia                | 0  | 0  | 0  | 0  |
| Ascomycot Eurotiomycetes Onygenales Gymnoascaceae Leucothecium              | 0  | 0  | 0  | 0  |
| Ascomycot Sordariomycetes Sordariales Chaetomia Humicola                    | 0  | 0  | 0  | 0  |
| Ascomycot Sordariomycetes Diaporthales Diaporthaceae                        | 0  | 0  | 0  | 0  |

|                                                              |    |    |    |    |
|--------------------------------------------------------------|----|----|----|----|
| Ascomycot Dothideom Tubeufiale Tubeufiaceae                  | 0  | 0  | 0  | 0  |
| Ascomycot Sordariom Glomerella Plectospha Lectera            | 16 | 0  | 0  | 0  |
| Ascomycot Dothideom Capnodiale Mycospha Geastrumia           | 16 | 0  | 0  | 0  |
| Ascomycota                                                   | 13 | 0  | 0  | 0  |
| Ascomycot Sordariom Myrmecrid Myrmecrid Myrmecridium         | 4  | 0  | 0  | 0  |
| Ascomycot Sordariom Diaporthal Cryphonectriaceae             | 0  | 16 | 0  | 0  |
| Ascomycot Sordariom Xylariales                               | 0  | 16 | 0  | 0  |
| Ascomycot Dothideom Pleosporal Sporormia Preussia            | 0  | 16 | 0  | 0  |
| Ascomycot Sordariom Xylariales Xylariaceae Xylaria           | 0  | 7  | 9  | 0  |
| Ascomycota                                                   | 0  | 0  | 16 | 0  |
| Ascomycot Sordariom Hypocreale Nectriaceae Neocosmospora     | 0  | 0  | 0  | 16 |
| Ascomycot Dothideom Dothideale Aureobasic Aureobasidium      | 0  | 0  | 0  | 7  |
| Ascomycot Sordariom Diaporthal Diaporthac Diaporthe          | 0  | 0  | 0  | 0  |
| Ascomycot Sordariom Diaporthal Diaporthac Diaporthe          | 0  | 0  | 0  | 0  |
| Ascomycot Sordariom Diaporthal Diaporthac Diaporthe          | 0  | 0  | 0  | 0  |
| Ascomycot Dothideom Capnodiale Teratosphaeriaceae            | 0  | 0  | 0  | 0  |
| Ascomycot Lecanorom Lecanorale Ramalinaceae Bacidina         | 0  | 0  | 0  | 0  |
| Ascomycot Dothideom Capnodiale Mycospha Pallidocercospora    | 0  | 0  | 0  | 0  |
| Ascomycot Dothideom Pleosporal Didymospha Kalmusia           | 0  | 0  | 0  | 0  |
| Ascomycot Sordariom Hypocreale Cordycipitae Simplicillium    | 0  | 0  | 0  | 0  |
| Ascomycot Dothideom Capnodiale Mycospha Xenosonderhenia      | 0  | 0  | 0  | 0  |
| Ascomycot Dothideom Capnodiale Teratosphaerale Lapidomyces   | 0  | 0  | 0  | 0  |
| Ascomycot Dothideom Tubeufiale Tubeufiaceae                  | 0  | 0  | 0  | 0  |
| Ascomycot Dothideom Capnodiale Mycospha Exutisphaerella      | 0  | 0  | 0  | 0  |
| Ascomycot Dothideom Capnodiale Mycosphaerellaceae            | 0  | 0  | 0  | 0  |
| Ascomycot Sordariomycetes                                    | 0  | 0  | 0  | 0  |
| Ascomycot Dothideom Capnodiale Teratosphaeriaceae            | 0  | 0  | 0  | 0  |
| Ascomycot Sordariom Diaporthal Valsaceae Cytospora           | 15 | 0  | 0  | 0  |
| Ascomycot Sordariom Sordariales Sordariales Ramophialophora  | 15 | 0  | 0  | 0  |
| Ascomycot Sordariom Hypocreale Clavicipitae Metarhizium      | 8  | 7  | 0  | 0  |
| Ascomycot Sordariom Xylariales Amphisphe Lepteutypa          | 5  | 0  | 0  | 0  |
| Ascomycot Archaeorhizomycetes                                | 0  | 15 | 0  | 0  |
| Ascomycot Dothideom Pleosporal Phaeospha Neosulcatispora     | 0  | 15 | 0  | 0  |
| Ascomycot Dothideom Capnodiale Cladospori Toxicocladosporium | 0  | 15 | 0  | 0  |
| Ascomycot Dothideom Capnodiale Mycosphaerellaceae            | 0  | 0  | 15 | 0  |
| Ascomycot Dothideom Dothideales                              | 0  | 0  | 15 | 0  |
| Ascomycot Sordariom Xylariales Sporocada Pestalotiopsis      | 0  | 0  | 0  | 15 |
| Ascomycot Dothideom Pleosporal Teichosporaceae               | 0  | 0  | 0  | 8  |
| Ascomycot Dothideom Pleosporal Pleosporac Curvularia         | 0  | 0  | 0  | 0  |
| Ascomycot Sordariom Sordariales Chaetomiaceae                | 0  | 0  | 0  | 0  |
| Ascomycot Dothideom Capnodiale Mycospha Geastrumia           | 0  | 0  | 0  | 0  |
| Ascomycot Leotiomyces Helotiales Dermateaceae Mollisia       | 0  | 0  | 0  | 0  |
| Ascomycot Sordariom Sordariales Sordariales Rhodoveronaea    | 0  | 0  | 0  | 0  |
| Ascomycot Dothideom Pleosporal Pleosporac Curvularia         | 0  | 0  | 0  | 0  |
| Ascomycot Dothideom Pleosporal Didymellaceae                 | 0  | 0  | 0  | 0  |
| Ascomycot Sordariom Branch06                                 | 0  | 0  | 0  | 0  |
| Ascomycot Sordariom Sordariales Lasiosphae Podospora         | 0  | 0  | 0  | 0  |
| Ascomycot Dothideom Capnodiale Mycosphaerellaceae            | 0  | 0  | 0  | 0  |
| Ascomycot Saccharom Saccharom Saccharom Kazachstania         | 0  | 0  | 0  | 0  |
| Ascomycot Dothideom Capnodiale Mycospha Ramularia            | 0  | 0  | 0  | 0  |

|                                                                            |    |    |    |   |
|----------------------------------------------------------------------------|----|----|----|---|
| Ascomycot Dothideomycetes Capnodiales Teratosphaeraceae Xenoteratosphaeria | 0  | 0  | 0  | 0 |
| Ascomycot Dothideomycetes Capnodiales Teratosphaeriaceae                   | 0  | 0  | 0  | 0 |
| Ascomycot Dothideomycetes Capnodiales Teratosphaeraceae Penidiella         | 0  | 0  | 0  | 0 |
| Ascomycot Leotiomyces Helotiales Hyaloscyphaceae                           | 14 | 0  | 0  | 0 |
| Ascomycot Sordariomycetes Sordariales                                      | 14 | 0  | 0  | 0 |
| Ascomycot Dothideomycetes Pleosporales                                     | 14 | 0  | 0  | 0 |
| Ascomycot Dothideomycetes Pleosporales Pleosporaceae Curvularia            | 14 | 0  | 0  | 0 |
| Ascomycot Dothideomycetes Pleosporales Teichosporaceae Teichospora         | 12 | 0  | 2  | 0 |
| Ascomycot Dothideomycetes Capnodiales                                      | 11 | 3  | 0  | 0 |
| Ascomycot Sordariomycetes                                                  | 6  | 8  | 0  | 0 |
| Ascomycot Sordariomycetes Chaetosphaeriales                                | 6  | 0  | 4  | 4 |
| Ascomycot Sordariomycetes Sordariales Lasiosphaeriaceae                    | 0  | 14 | 0  | 0 |
| Ascomycot Pezizomycetes Pezizales Pyrenopezizaceae Scutellinia             | 0  | 14 | 0  | 0 |
| Ascomycot Sordariomycetes Xylariales Amphispheeraceae                      | 0  | 7  | 3  | 0 |
| Ascomycot Dothideomycetes Pleosporales Massariaceae Helminthosporium       | 0  | 0  | 14 | 0 |
| Ascomycot Sordariomycetes Diaporthales Diaporthaceae Diaporthe             | 0  | 0  | 14 | 0 |
| Ascomycot Dothideomycetes Capnodiales Teratosphaeriaceae                   | 0  | 0  | 14 | 0 |
| Ascomycot Dothideomycetes Capnodiales Mycosphaeraceae Clypeosphaerella     | 0  | 0  | 0  | 0 |
| Ascomycot Dothideomycetes Capnodiales Teratosphaeriaceae                   | 0  | 0  | 0  | 0 |
| Ascomycot Sordariomycetes Xylariales Amphispheeraceae Amphispheeria        | 0  | 0  | 0  | 0 |
| Ascomycot Sordariomycetes Xylariales                                       | 0  | 0  | 0  | 0 |
| Ascomycot Sordariomycetes Hypocreales Stachybotriaceae Stachybotrys        | 0  | 0  | 0  | 0 |
| Ascomycot Dothideomycetes Capnodiales Cladosporiaceae Cladosporium         | 0  | 0  | 0  | 0 |
| Ascomycot Dothideomycetes Pleosporales Phaeosphaeraceae Phaeosphaeria      | 0  | 0  | 0  | 0 |
| Ascomycot Sordariomycetes                                                  | 0  | 0  | 0  | 0 |
| Ascomycot Eurotiomycetes Chaetothiales Chaetothiales Strelitziana          | 0  | 0  | 0  | 0 |
| Ascomycot Sordariomycetes Sordariales Chaetomiaceae Acrophialophora        | 0  | 0  | 0  | 0 |
| Ascomycot Sordariomycetes Sordariales                                      | 0  | 0  | 0  | 0 |
| Ascomycot Sordariomycetes Diaporthales Cryphonectriaceae Aurantiosaccus    | 0  | 0  | 0  | 0 |
| Ascomycot Eurotiomycetes Chaetothiales Herpotrichiellaceae                 | 0  | 0  | 0  | 0 |
| Ascomycot Eurotiomycetes Eurotiales Trichocomaceae Talaromyces             | 0  | 0  | 0  | 0 |
| Ascomycot Sordariomycetes                                                  | 0  | 0  | 0  | 0 |
| Ascomycot Sordariomycetes Sordariales Lasiosphaeriaceae                    | 0  | 0  | 0  | 0 |
| Ascomycot Leotiomyces Thelebolaceae Pseudoeurotium                         | 0  | 0  | 0  | 0 |
| Ascomycot Dothideomycetes Capnodiales Mycosphaerellaceae                   | 0  | 0  | 0  | 0 |
| Ascomycota                                                                 | 0  | 0  | 0  | 0 |
| Ascomycot Eurotiomycetes Eurotiales Aspergillaceae Penicillium             | 0  | 0  | 0  | 0 |
| Ascomycot Dothideomycetes Pleosporales Didymosphaeraceae Kalmusia          | 0  | 0  | 0  | 0 |
| Ascomycot Dothideomycetes Capnodiales Cladosporiaceae Cladosporium         | 0  | 0  | 0  | 0 |
| Ascomycot Sordariomycetes Xylariales Fasciatisporaceae Fasciatispora       | 0  | 0  | 0  | 0 |
| Ascomycot Dothideomycetes Pleosporales Pleosporaceae Bipolaris             | 0  | 0  | 0  | 0 |
| Ascomycot Sordariomycetes Sordariales Lasiosphaeriaceae                    | 0  | 0  | 0  | 0 |
| Ascomycot Sordariomycetes Diaporthales Cryphonectriaceae                   | 0  | 0  | 0  | 0 |
| Ascomycot Sordariomycetes Diaporthales Valsaceae Cytospora                 | 0  | 0  | 0  | 0 |
| Ascomycot Dothideomycetes Capnodiales Mycosphaerellaceae                   | 0  | 0  | 0  | 0 |
| Ascomycot Dothideomycetes Capnodiales Mycosphaeraceae Madagascaromyces     | 0  | 0  | 0  | 0 |
| Ascomycot Eurotiomycetes Onygenales Onygenales Zeloasperisporium           | 0  | 0  | 0  | 0 |
| Ascomycot Dothideomycetes Pleosporales Sporormiaceae Preussia              | 13 | 0  | 0  | 0 |
| Ascomycot Sordariomycetes Hypocreales Cordycipitaceae Simplicillium        | 13 | 0  | 0  | 0 |
| Ascomycot Leotiomyces Helotiales Helotiales Triposporium                   | 13 | 0  | 0  | 0 |

|                                                               |    |    |    |    |
|---------------------------------------------------------------|----|----|----|----|
| Ascomycot Eurotiomyi Chaetothyi Trichomeri Trichomerium       | 13 | 0  | 0  | 0  |
| Ascomycot Eurotiomyi Eurotiales Aspergillac Penicillium       | 13 | 0  | 0  | 0  |
| Ascomycota                                                    | 13 | 0  | 0  | 0  |
| Ascomycot Dothideomycetes                                     | 8  | 5  | 0  | 0  |
| Ascomycot Dothideomr Pleosporal Phaeospha Paraphoma           | 7  | 0  | 6  | 0  |
| Ascomycot Sordariomr Xylariales Amphisphe Amphisphaeria       | 0  | 13 | 0  | 0  |
| Ascomycot Sordariomr Diaporthales                             | 0  | 13 | 0  | 0  |
| Ascomycot Dothideomr Pleosporal Didymospha Paraphaeosphaeria  | 0  | 0  | 13 | 0  |
| Ascomycot Eurotiomyi Chaetothyriales                          | 0  | 0  | 13 | 0  |
| Ascomycot Dothideomr Capnodiale Mycospha Pallidocercospora    | 0  | 0  | 13 | 0  |
| Ascomycot Dothideomr Capnodiales                              | 0  | 0  | 4  | 0  |
| Ascomycot Dothideomr Capnodiale Teratospha Xenoteratosphaeria | 0  | 0  | 0  | 13 |
| Ascomycot Dothideomr Capnodiale Teratosphaeriaceae            | 0  | 0  | 0  | 0  |
| Ascomycot Eurotiomyi Chaetothyi Trichomeri Knufia             | 0  | 0  | 0  | 0  |
| Ascomycot Leotiomyci Helotiales                               | 0  | 0  | 0  | 0  |
| Ascomycot Dothideomr Pleosporal Leptospha Acicuseptoria       | 0  | 0  | 0  | 0  |
| Ascomycot Eurotiomyi Chaetothyi Chaetothyi Chaetothyrium      | 0  | 0  | 0  | 0  |
| Ascomycot Dothideomr Capnodiales                              | 0  | 0  | 0  | 0  |
| Ascomycot Sordariomr Magnapor Magnapor Arxiella               | 0  | 0  | 0  | 0  |
| Ascomycot Eurotiomyi Onygenale Onygenale Zeloasperisporium    | 0  | 0  | 0  | 0  |
| Ascomycot Archaeorhi Archaeorhi Archaeorhi Archaeorhizomyces  | 0  | 0  | 0  | 0  |
| Ascomycot Sordariomr Hypocreale Nectriaceae Ilyonectria       | 0  | 0  | 0  | 0  |
| Ascomycot Sordariomr Hypocreale Nectriaceae Penicillifer      | 0  | 0  | 0  | 0  |
| Ascomycot Dothideomr Pleosporal Didymosphaeriaceae            | 0  | 0  | 0  | 0  |
| Ascomycot Dothideomr Pleosporal Phaeospha Phaeosphaeria       | 0  | 0  | 0  | 0  |
| Ascomycot Sordariomr Diaporthal Cryphonect Mastigospora       | 0  | 0  | 0  | 0  |
| Ascomycot Lecanoromr Ostropales Gomphillal Corticifraga       | 0  | 0  | 0  | 0  |
| Ascomycot Dothideomr Capnodiale Mycosphaerellaceae            | 0  | 0  | 0  | 0  |
| Ascomycot Eurotiomyi Eurotiales Aspergillaceae                | 12 | 0  | 0  | 0  |
| Ascomycot Sordariomr Hypocreale Hypocreale Emericellopsis     | 12 | 0  | 0  | 0  |
| Ascomycot Dothideomr Capnodiale Teratosphaeriaceae            | 12 | 0  | 0  | 0  |
| Ascomycot Dothideomr Capnodiale Cladospori Toxicocladosporium | 12 | 0  | 0  | 0  |
| Ascomycot Dothideomr Capnodiales                              | 12 | 0  | 0  | 0  |
| Ascomycot Sordariomr Glomerella Glomerella Colletotrichum     | 6  | 6  | 0  | 0  |
| Ascomycot Dothideomr Botryospha Botryospha Diplodia           | 2  | 0  | 0  | 0  |
| Ascomycot Archaeorhi Archaeorhi Archaeorhi Archaeorhizomyces  | 0  | 12 | 0  | 0  |
| Ascomycot Sordariomycetes                                     | 0  | 12 | 0  | 0  |
| Ascomycot Dothideomr Pleosporal Tetraplosphaeriaceae          | 0  | 12 | 0  | 0  |
| Ascomycot Sordariomr Sordariales Sordariales Rhodoveronaea    | 0  | 6  | 0  | 0  |
| Ascomycot Dothideomr Capnodiale Teratosphaeriaceae            | 0  | 0  | 12 | 0  |
| Ascomycot Leotiomyci Erysiphales Erysiphace Podosphaera       | 0  | 0  | 7  | 0  |
| Ascomycot Dothideomr Pleosporal Pleosporal Parapyrenochaeta   | 0  | 0  | 0  | 12 |
| Ascomycota                                                    | 0  | 0  | 0  | 0  |
| Ascomycota                                                    | 0  | 0  | 0  | 0  |
| Ascomycot Sordariomr Sordariales                              | 0  | 0  | 0  | 0  |
| Ascomycot Eurotiomyi Eurotiales Trichocom Talaromyces         | 0  | 0  | 0  | 0  |
| Ascomycot Dothideomr Capnodiale Schizothyri Johansonia        | 0  | 0  | 0  | 0  |
| Ascomycot Dothideomr Venturiales Sympoveni Ochroconis         | 0  | 0  | 0  | 0  |
| Ascomycot Sordariomr Diaporthal Diaporthac Diaporthe          | 0  | 0  | 0  | 0  |
| Ascomycot Archaeorhi Archaeorhi Archaeorhi Archaeorhizomyces  | 0  | 0  | 0  | 0  |

|                                                                                                                              |    |    |    |    |
|------------------------------------------------------------------------------------------------------------------------------|----|----|----|----|
| Ascomycot Archaeorhi Archaeorhi Archaeorhi Archaeorhizomyces                                                                 | 0  | 0  | 0  | 0  |
| Ascomycot Sordariom <sup>†</sup> Hypocreale <sup>†</sup> Nectriacea Volutella                                                | 0  | 0  | 0  | 0  |
| Ascomycot Dothideom <sup>†</sup> Pleosporal <sup>†</sup> Phaeospha Neosetophoma                                              | 0  | 0  | 0  | 0  |
| Ascomycot Sordariom <sup>†</sup> Hypocreale <sup>†</sup> Nectriacea Fusarium                                                 | 0  | 0  | 0  | 0  |
| Ascomycot Archaeorhizomycetes                                                                                                | 0  | 0  | 0  | 0  |
| Ascomycot Leotiomyc <sup>†</sup> Helotiales <sup>†</sup> Dermateaceae                                                        | 0  | 0  | 0  | 0  |
| Ascomycot Sordariom <sup>†</sup> Sordariales                                                                                 | 0  | 0  | 0  | 0  |
| Ascomycot Eurotiomy <sup>†</sup> Chaetothy <sup>†</sup> Chaetothy <sup>†</sup> Strelitziana                                  | 0  | 0  | 0  | 0  |
| Ascomycot Archaeorhi Archaeorhi Archaeorhi Archaeorhizomyces                                                                 | 0  | 0  | 0  | 0  |
| Ascomycot Sordariom <sup>†</sup> Conioscyp <sup>†</sup> Conioscyp <sup>†</sup> Conioscyp <sup>†</sup> Conioscyp <sup>†</sup> | 0  | 0  | 0  | 0  |
| Ascomycot Dothideom <sup>†</sup> Capnodiale <sup>†</sup> Mycospha <sup>†</sup> Phaeophleospora                               | 11 | 0  | 0  | 0  |
| Ascomycot Dothideom <sup>†</sup> Pleosporal <sup>†</sup> Lophiotremataceae                                                   | 11 | 0  | 0  | 0  |
| Ascomycot Sordariom <sup>†</sup> Sordariales <sup>†</sup> Lasiosphaeriaceae                                                  | 0  | 11 | 0  | 0  |
| Ascomycot Sordariom <sup>†</sup> Glomerella Glomerella Colletotrichum                                                        | 0  | 11 | 0  | 0  |
| Ascomycot Eurotiomy <sup>†</sup> Chaetothy <sup>†</sup> Trichomeri <sup>†</sup> Trichomerium                                 | 0  | 0  | 11 | 0  |
| Ascomycot Dothideomycetes                                                                                                    | 0  | 0  | 3  | 6  |
| Ascomycot Sordariom <sup>†</sup> Hypocreale <sup>†</sup> Nectriaceae                                                         | 0  | 0  | 0  | 11 |
| Ascomycot Eurotiomy <sup>†</sup> Eurotiales <sup>†</sup> Aspergillac <sup>†</sup> Penicillium                                | 0  | 0  | 0  | 0  |
| Ascomycot Sordariom <sup>†</sup> Hypocreale <sup>†</sup> Nectriacea Thelonectria                                             | 0  | 0  | 0  | 0  |
| Ascomycot Dothideom <sup>†</sup> Pleosporal <sup>†</sup> Phaeospha Phaeosphaeria                                             | 0  | 0  | 0  | 0  |
| Ascomycot Sordariom <sup>†</sup> Hypocreale <sup>†</sup> Nectriacea Neocosmospora                                            | 0  | 0  | 0  | 0  |
| Ascomycot Sordariom <sup>†</sup> Hypocreale <sup>†</sup> Nectriacea Mariannaea                                               | 0  | 0  | 0  | 0  |
| Ascomycot Sordariom <sup>†</sup> Chaetosph <sup>†</sup> Chaetosph <sup>†</sup> Chloridium                                    | 0  | 0  | 0  | 0  |
| Ascomycot Eurotiomy <sup>†</sup> Eurotiales <sup>†</sup> Trichocom <sup>†</sup> Talaromyces                                  | 0  | 0  | 0  | 0  |
| Ascomycot Eurotiomy <sup>†</sup> Eurotiales <sup>†</sup> Aspergillac <sup>†</sup> Penicillium                                | 0  | 0  | 0  | 0  |
| Ascomycot Sordariom <sup>†</sup> Diaporthal <sup>†</sup> Diaporthac <sup>†</sup> Diaporthe                                   | 0  | 0  | 0  | 0  |
| Ascomycot Dothideomycetes                                                                                                    | 0  | 0  | 0  | 0  |
| Ascomycot Sordariom <sup>†</sup> Sordariales <sup>†</sup> Lasiosphae <sup>†</sup> Schizothecium                              | 0  | 0  | 0  | 0  |
| Ascomycot Dothideom <sup>†</sup> Capnodiale <sup>†</sup> Teratosphaeriaceae                                                  | 0  | 0  | 0  | 0  |
| Ascomycot Eurotiomy <sup>†</sup> Chaetothy <sup>†</sup> Chaetothy <sup>†</sup> Strelitziana                                  | 0  | 0  | 0  | 0  |
| Ascomycota                                                                                                                   | 0  | 0  | 0  | 0  |
| Ascomycot Sordariom <sup>†</sup> Hypocreale <sup>†</sup> Nectriacea Neocosmospora                                            | 0  | 0  | 0  | 0  |
| Ascomycota                                                                                                                   | 0  | 0  | 0  | 0  |
| Ascomycot Dothideom <sup>†</sup> Capnodiale <sup>†</sup> Cladospori <sup>†</sup> Rachicladosporium                           | 0  | 0  | 0  | 0  |
| Ascomycot Sordariom <sup>†</sup> Sordariales <sup>†</sup> Chaetomia <sup>†</sup> Zopfiella                                   | 0  | 0  | 0  | 0  |
| Ascomycot Eurotiomy <sup>†</sup> Onygenale <sup>†</sup> Onygenale <sup>†</sup> Zeloasperisporium                             | 0  | 0  | 0  | 0  |
| Ascomycot Dothideom <sup>†</sup> Pleosporal <sup>†</sup> Didymellaceae                                                       | 0  | 0  | 0  | 0  |
| Ascomycot Sordariomycetes                                                                                                    | 0  | 0  | 0  | 0  |
| Ascomycot Sordariom <sup>†</sup> Glomerella <sup>†</sup> Plectosphaerellaceae                                                | 0  | 0  | 0  | 0  |
| Ascomycot Dothideom <sup>†</sup> Capnodiale <sup>†</sup> Teratosphaeriaceae                                                  | 0  | 0  | 0  | 0  |
| Ascomycot Dothideom <sup>†</sup> Capnodiale <sup>†</sup> Mycospha <sup>†</sup> Ramulariopsis                                 | 0  | 0  | 0  | 0  |
| Ascomycot Sordariom <sup>†</sup> Sordariales <sup>†</sup> Sordariace <sup>†</sup> Gelasinospora                              | 0  | 0  | 0  | 0  |
| Ascomycota                                                                                                                   | 0  | 0  | 0  | 0  |
| Ascomycot Archaeorhi Archaeorhi Archaeorhi Archaeorhizomyces                                                                 | 10 | 0  | 0  | 0  |
| Ascomycot Archaeorhizomycetes                                                                                                | 10 | 0  | 0  | 0  |
| Ascomycot Sordariom <sup>†</sup> Hypocreale <sup>†</sup> Nectriacea Fusicolla                                                | 10 | 0  | 0  | 0  |
| Ascomycot Saccharom <sup>†</sup> Saccharom <sup>†</sup> Dipodasc <sup>†</sup> Dipodascus                                     | 10 | 0  | 0  | 0  |
| Ascomycot Eurotiomy <sup>†</sup> Eurotiales <sup>†</sup> Aspergillac <sup>†</sup> Penicillium                                | 10 | 0  | 0  | 0  |
| Ascomycot Dothideom <sup>†</sup> Pleosporal <sup>†</sup> Phaeospha Phaeosphaeria                                             | 10 | 0  | 0  | 0  |
| Ascomycot Pezizomyc <sup>†</sup> Pezizales <sup>†</sup> Sarcosomataceae                                                      | 10 | 0  | 0  | 0  |

|                                                                                                    |   |    |    |    |
|----------------------------------------------------------------------------------------------------|---|----|----|----|
| Ascomycot Sordariom <sup>†</sup> Xylariales Xylariaceae                                            | 0 | 10 | 0  | 0  |
| Ascomycot Dothideom <sup>†</sup> Pleosporal <sup>†</sup> Pleosporac Curvularia                     | 0 | 10 | 0  | 0  |
| Ascomycot Eurotiomy <sup>†</sup> Eurotiales Aspergillac Penicillium                                | 0 | 10 | 0  | 0  |
| Ascomycot Dothideom <sup>†</sup> Capnodiales                                                       | 0 | 10 | 0  | 0  |
| Ascomycot Sordariom <sup>†</sup> Hypocreale <sup>†</sup> Nectriacea Gibberella                     | 0 | 10 | 0  | 0  |
| Ascomycot Sordariom <sup>†</sup> Sordariales Chaetomia Retroconis                                  | 0 | 10 | 0  | 0  |
| Ascomycot Dothideom <sup>†</sup> Capnodiale Teratosphaeriaceae                                     | 0 | 0  | 10 | 0  |
| Ascomycota                                                                                         | 0 | 0  | 10 | 0  |
| Ascomycot Eurotiomy <sup>†</sup> Chaetothy <sup>†</sup> Herpotrichiellaceae                        | 0 | 0  | 3  | 0  |
| Ascomycot Sordariom <sup>†</sup> Hypocreale <sup>†</sup> Nectriacea Cylindrocarpon                 | 0 | 0  | 0  | 10 |
| Ascomycot Sordariom <sup>†</sup> Hypocreale <sup>†</sup> Nectriacea Neocosmospora                  | 0 | 0  | 0  | 10 |
| Ascomycot Sordariom <sup>†</sup> Diaporthales                                                      | 0 | 0  | 0  | 0  |
| Ascomycot Eurotiomy <sup>†</sup> Eurotiales Aspergillac Penicillium                                | 0 | 0  | 0  | 0  |
| Ascomycot Dothideom <sup>†</sup> Pleosporal <sup>†</sup> Parabamb <sup>†</sup> Multiseptospora     | 0 | 0  | 0  | 0  |
| Ascomycot Sordariom <sup>†</sup> Sordariales                                                       | 0 | 0  | 0  | 0  |
| Ascomycot Eurotiomy <sup>†</sup> Eurotiales Aspergillac Penicillium                                | 0 | 0  | 0  | 0  |
| Ascomycot Dothideom <sup>†</sup> Pleosporal <sup>†</sup> Cucurbitari <sup>†</sup> Pyrenochaetopsis | 0 | 0  | 0  | 0  |
| Ascomycot Saccharom <sup>†</sup> Saccharom Phaffomyc <sup>†</sup> Wickerhamomyces                  | 0 | 0  | 0  | 0  |
| Ascomycot Sordariom <sup>†</sup> Glomerella Plectosphaerellaceae                                   | 0 | 0  | 0  | 0  |
| Ascomycot Dothideom <sup>†</sup> Capnodiales                                                       | 0 | 0  | 0  | 0  |
| Ascomycot Sordariom <sup>†</sup> Sordariales Lasiosphae Cladorrhinum                               | 0 | 0  | 0  | 0  |
| Ascomycot Saccharom <sup>†</sup> Saccharom Debaryom <sup>†</sup> Meyerozyma                        | 0 | 0  | 0  | 0  |
| Ascomycot Dothideom <sup>†</sup> Capnodiale Mycosphae Paramycosphaerella                           | 0 | 0  | 0  | 0  |
| Ascomycot Dothideom <sup>†</sup> Pleosporal <sup>†</sup> Periconiaca <sup>†</sup> Periconia        | 0 | 0  | 0  | 0  |
| Ascomycot Dothideom <sup>†</sup> Capnodiale Mycosphae Zymoseptoria                                 | 0 | 0  | 0  | 0  |
| Ascomycot Sordariom <sup>†</sup> Hypocreale <sup>†</sup> Nectriacea Gibberella                     | 0 | 0  | 0  | 0  |
| Ascomycot Dothideom <sup>†</sup> Pleosporal <sup>†</sup> Periconiaca <sup>†</sup> Periconia        | 0 | 0  | 0  | 0  |
| Ascomycot Eurotiomy <sup>†</sup> Chaetothy <sup>†</sup> Chaetothy <sup>†</sup> Strelitziana        | 0 | 0  | 0  | 0  |
| Ascomycot Dothideom <sup>†</sup> Pleosporal <sup>†</sup> Pleosporac Curvularia                     | 0 | 0  | 0  | 0  |
| Ascomycot Dothideom <sup>†</sup> Hysteriales Hysteriace Gloniopsis                                 | 0 | 0  | 0  | 0  |
| Ascomycot Dothideom <sup>†</sup> Pleosporal <sup>†</sup> Didymellac <sup>†</sup> Paraboeremia      | 0 | 0  | 0  | 0  |
| Ascomycot Eurotiomy <sup>†</sup> Phaeomoniellales                                                  | 0 | 0  | 0  | 0  |
| Ascomycota                                                                                         | 0 | 0  | 0  | 0  |
| Ascomycot Sordariom <sup>†</sup> Hypocreale <sup>†</sup> Hypocreac <sup>†</sup> Trichoderma        | 0 | 0  | 0  | 0  |
| Ascomycot Dothideom <sup>†</sup> Pleosporal <sup>†</sup> Cucurbitariaceae                          | 0 | 0  | 0  | 0  |
| Ascomycot Eurotiomy <sup>†</sup> Chaetothyriales                                                   | 0 | 0  | 0  | 0  |
| Ascomycot Eurotiomy <sup>†</sup> Eurotiales Aspergillac Penicillium                                | 0 | 0  | 0  | 0  |
| Ascomycot Sordariom <sup>†</sup> Xylariales Xylariales_ Liberomyces                                | 0 | 0  | 0  | 0  |
| Ascomycot Dothideom <sup>†</sup> Pleosporal <sup>†</sup> Cucurbitari <sup>†</sup> Pyrenochaeta     | 0 | 0  | 0  | 0  |
| Ascomycot Leotiomy <sup>†</sup> Helotiales Vibrisseac <sup>†</sup> Phialoceph humicola             | 0 | 0  | 0  | 0  |
| Ascomycot Dothideom <sup>†</sup> Dothideale Aureobasic Aureobasidium                               | 0 | 0  | 0  | 0  |
| Ascomycot Eurotiomy <sup>†</sup> Chaetothy <sup>†</sup> Chaetothy <sup>†</sup> Chaetothyrium       | 9 | 0  | 0  | 0  |
| Ascomycot Pezizomyc <sup>†</sup> Pezizales Pyronemat Aleuria                                       | 9 | 0  | 0  | 0  |
| Ascomycot Sordariom <sup>†</sup> Hypocreale <sup>†</sup> Nectriacea Ophionectria                   | 9 | 0  | 0  | 0  |
| Ascomycot Sordariom <sup>†</sup> Sordariales Lasiosphae Cercophora                                 | 0 | 9  | 0  | 0  |
| Ascomycot Pezizomyc <sup>†</sup> Pezizales Pyronemat Geopora                                       | 0 | 9  | 0  | 0  |
| Ascomycot Sordariom <sup>†</sup> Microascal Microasca <sup>†</sup> Canariomyces                    | 0 | 9  | 0  | 0  |
| Ascomycot Dothideomycetes                                                                          | 0 | 9  | 0  | 0  |
| Ascomycot Dothideom <sup>†</sup> Pleosporal <sup>†</sup> Lophiotren Atrocalyx                      | 0 | 9  | 0  | 0  |
| Ascomycot Leotiomy <sup>†</sup> Helotiales Helotiacea Tetracladium                                 | 0 | 0  | 9  | 0  |

|                      |                   |                    |                        |   |   |   |   |
|----------------------|-------------------|--------------------|------------------------|---|---|---|---|
| Ascomycot Sordariom  | Hypocreale        | Bionectriac        | Bionectria             | 0 | 0 | 4 | 0 |
| Ascomycot Sordariom  | Sordariales       | Chaetomia          | Chaetomium             | 0 | 0 | 0 | 0 |
| Ascomycot Dothideom  | Pleosporal        | Torulaceae         | Torula                 | 0 | 0 | 0 | 0 |
| Ascomycot Eurotiomy  | Eurotiales        | Aspergillac        | Penicillium            | 0 | 0 | 0 | 0 |
| Ascomycot Eurotiomy  | Eurotiales        |                    |                        | 0 | 0 | 0 | 0 |
| Ascomycot Eurotiomy  | Eurotiales        | Aspergillaceae     |                        | 0 | 0 | 0 | 0 |
| Ascomycot Sordariom  | Microascal        | Microascae         | Microascus             | 0 | 0 | 0 | 0 |
| Ascomycot Sordariom  | Chaetosph         | Chaetosphaeriaceae |                        | 0 | 0 | 0 | 0 |
| Ascomycot Dothideom  | Pleosporal        | Pleosporal         | Fusculina              | 0 | 0 | 0 | 0 |
| Ascomycot Dothideom  | Hysteriales       | Hysteriace         | Gloniopsis             | 0 | 0 | 0 | 0 |
| Ascomycot Sordariom  | Hypocreale        | Hypocreale         | Acremonium             | 0 | 0 | 0 | 0 |
| Ascomycot Sordariom  | Coniochaet        | Coniochaet         | Coniochaeta            | 0 | 0 | 0 | 0 |
| Ascomycot Dothideom  | Capnodiales       |                    |                        | 0 | 0 | 0 | 0 |
| Ascomycot Dothideom  | Pleosporales      |                    |                        | 0 | 0 | 0 | 0 |
| Ascomycot Leotiomyci | Helotiales        | Pezizellace        | Porodiplodia           | 0 | 0 | 0 | 0 |
| Ascomycot Sordariom  | Hypocreale        | Nectriaceae        | Penicillifer           | 0 | 0 | 0 | 0 |
| Ascomycot Sordariom  | Xylariales        | Xylariales_        | Hansfordia             | 0 | 0 | 0 | 0 |
| Ascomycot Sordariom  | Hypocreales       |                    |                        | 0 | 0 | 0 | 0 |
| Ascomycot Sordariom  | Xylariales        |                    |                        | 0 | 0 | 0 | 0 |
| Ascomycot Dothideom  | Capnodiale        | Mycosphaerellaceae |                        | 0 | 0 | 0 | 0 |
| Ascomycot Sordariom  | Hypocreale        | Bionectriac        | Geosmithia             | 0 | 0 | 0 | 0 |
| Ascomycot Sordariom  | Hypocreale        | Bionectriac        | Gliomastix             | 0 | 0 | 0 | 0 |
| Ascomycot Sordariom  | Hypocreale        | Hypocreac          | Trichoderma            | 0 | 0 | 0 | 0 |
| Ascomycot Dothideom  | Pleosporal        | Pleosporac         | Curvularia             | 0 | 0 | 0 | 0 |
| Ascomycot Dothideom  | Pleosporal        | Didymellaceae      |                        | 0 | 0 | 0 | 0 |
| Ascomycot Dothideom  | Myriangiales      |                    |                        | 0 | 0 | 0 | 0 |
| Ascomycot Dothideom  | Tubeufiale        | Tubeufiaceae       |                        | 0 | 0 | 0 | 0 |
| Ascomycot Sordariom  | Xylariales        | Amphispha          | Amphisphaeria          | 0 | 0 | 0 | 0 |
| Ascomycot Sordariom  | Xylariales        | Xylariaceae        | Hypoxyton              | 0 | 0 | 0 | 0 |
| Ascomycot Archaeorhi | Archaeorhi        | Archaeorhi         | Archaeorhizomyces      | 8 | 0 | 0 | 0 |
| Ascomycot Sordariom  | Hypocreale        | Nectriaceae        | Paracremonium          | 8 | 0 | 0 | 0 |
| Ascomycot Dothideom  | Capnodiale        | Mycosphae          | Paramycosphaerella     | 8 | 0 | 0 | 0 |
| Ascomycot Sordariom  | Xylariales        |                    |                        | 8 | 0 | 0 | 0 |
| Ascomycot Pezizomyci | Pezizales         | Ascobolace         | Ascobolus              | 8 | 0 | 0 | 0 |
| Ascomycot Saccharom  | Saccharomycetales |                    |                        | 8 | 0 | 0 | 0 |
| Ascomycota           |                   |                    |                        | 8 | 0 | 0 | 0 |
| Ascomycot Pezizomyci | Pezizales         | Ascobolace         | Ascobolus              | 4 | 4 | 0 | 0 |
| Ascomycot Dothideom  | Pleosporal        | Sporormia          | Preussia               | 0 | 8 | 0 | 0 |
| Ascomycot Dothideom  | Pleosporal        | Phaeospha          | Paraphoma              | 0 | 8 | 0 | 0 |
| Ascomycot Sordariom  | Sordariales       | Lasiosphae         | Apiosordaria           | 0 | 8 | 0 | 0 |
| Ascomycot Pezizomyci | Pezizales         | Ascodesmi          | Cephalophora           | 0 | 8 | 0 | 0 |
| Ascomycot Dothideom  | Pleosporal        | Pleosporal         | Fusculina              | 0 | 8 | 0 | 0 |
| Ascomycot Dothideom  | Pleosporal        | Didymosph          | Paraphaeosphaeria      | 0 | 8 | 0 | 0 |
| Ascomycot Dothideom  | Pleosporal        | Torulaceae         | Torula                 | 0 | 8 | 0 | 0 |
| Ascomycot Dothideom  | Pleosporal        | Pleosporac         | Cochliobolus           | 0 | 8 | 0 | 0 |
| Ascomycot Sordariom  | Branch06          |                    |                        | 0 | 8 | 0 | 0 |
| Ascomycot Dothideom  | Pleosporal        | Periconiaca        | Periconia              | 0 | 0 | 8 | 0 |
| Ascomycot Dothideom  | Capnodiale        | Teratospha         | Xenoteratosphaeria     | 0 | 0 | 0 | 0 |
| Ascomycot Sordariom  | Hypocreale        | Hypocreac          | Trichoderma longibrach | 0 | 0 | 0 | 0 |
| Ascomycot Sordariom  | Xylariales        | Sporocada          | Seiridium              | 0 | 0 | 0 | 0 |



|                                                                                                     |   |   |   |   |
|-----------------------------------------------------------------------------------------------------|---|---|---|---|
| Ascomycot Sordariom <sup>1</sup> Diaporthal <sup>1</sup> Diaporthac <sup>1</sup> Diaporthe          | 0 | 0 | 0 | 0 |
| Ascomycot Dothideom <sup>1</sup> Pleosporal <sup>1</sup> Periconiact <sup>1</sup> Periconia         | 0 | 0 | 0 | 0 |
| Ascomycot Sordariom <sup>1</sup> Sordariales                                                        | 0 | 0 | 0 | 0 |
| Ascomycot Archaeorhizomycetes                                                                       | 0 | 0 | 0 | 0 |
| Ascomycot Dothideom <sup>1</sup> Pleosporal <sup>1</sup> Cucurbitari <sup>1</sup> Pyrenochaeta      | 0 | 0 | 0 | 0 |
| Ascomycot Sordariom <sup>1</sup> Sordariales Chaetomia Corynascus                                   | 0 | 0 | 0 | 0 |
| Ascomycot Sordariom <sup>1</sup> Hypocreale <sup>1</sup> Bionectriac <sup>1</sup> Hydropisphaera    | 0 | 0 | 0 | 0 |
| Ascomycot Dothideom <sup>1</sup> Asterinales Parmularia Parmularia                                  | 0 | 0 | 0 | 0 |
| Ascomycot Sordariom <sup>1</sup> Coniochaet <sup>1</sup> Coniochaet <sup>1</sup> Coniochaeta        | 0 | 0 | 0 | 0 |
| Ascomycot Saccharom <sup>1</sup> Saccharom <sup>1</sup> Dipodascaceae                               | 0 | 0 | 0 | 0 |
| Ascomycot Pezizomyc <sup>1</sup> Pezizales Ascobolace <sup>1</sup> Ascobolus                        | 0 | 0 | 0 | 0 |
| Ascomycot Dothideom <sup>1</sup> Myriangiales                                                       | 0 | 0 | 0 | 0 |
| Ascomycot Eurotiomyc <sup>1</sup> Eurotiales Trichocom <sup>1</sup> Talaromyces                     | 0 | 0 | 0 | 0 |
| Ascomycot Dothideom <sup>1</sup> Myriangial <sup>1</sup> Elsinoacea Elsinoe                         | 0 | 0 | 0 | 0 |
| Ascomycot Sordariom <sup>1</sup> Hypocreale <sup>1</sup> Nectriacea Fusicolla                       | 0 | 0 | 0 | 0 |
| Ascomycot Dothideom <sup>1</sup> Pleosporal <sup>1</sup> Sporormia <sup>1</sup> Westerdykella       | 0 | 0 | 0 | 0 |
| Ascomycot Sordariom <sup>1</sup> Hypocreale <sup>1</sup> Nectriacea Paracremo binnewijze            | 0 | 0 | 0 | 0 |
| Ascomycot Dothideom <sup>1</sup> Pleosporal <sup>1</sup> Didymellac <sup>1</sup> Pseudoascochyta    | 0 | 0 | 0 | 0 |
| Ascomycot Sordariom <sup>1</sup> Glomerella Plectospha Lectera                                      | 0 | 0 | 0 | 0 |
| Ascomycot Dothideom <sup>1</sup> Pleosporal <sup>1</sup> Pleosporac <sup>1</sup> Bipolaris          | 0 | 0 | 0 | 0 |
| Ascomycot Dothideom <sup>1</sup> Pleosporal <sup>1</sup> Cucurbitari <sup>1</sup> Pyrenochaetopsis  | 0 | 0 | 0 | 0 |
| Ascomycot Eurotiomyc <sup>1</sup> Chaetothyr <sup>1</sup> Herpotrich Veronaea                       | 0 | 0 | 0 | 0 |
| Ascomycot Dothideom <sup>1</sup> Pleosporal <sup>1</sup> Phaeospha Neosulcatispora                  | 0 | 0 | 0 | 0 |
| Ascomycot Eurotiomyc <sup>1</sup> Chaetothyriales                                                   | 7 | 0 | 0 | 0 |
| Ascomycot Archaeorhi <sup>1</sup> Archaeorhi <sup>1</sup> Archaeorhi <sup>1</sup> Archaeorhizomyces | 7 | 0 | 0 | 0 |
| Ascomycot Dothideom <sup>1</sup> Venturiale <sup>1</sup> Sympoven <sup>1</sup> Neocoleroa           | 7 | 0 | 0 | 0 |
| Ascomycot Leotiomycetes                                                                             | 7 | 0 | 0 | 0 |
| Ascomycot Dothideom <sup>1</sup> Venturiale <sup>1</sup> Sympoven <sup>1</sup> Neocoleroa           | 7 | 0 | 0 | 0 |
| Ascomycot Sordariom <sup>1</sup> Xylariales Microdoch <sup>1</sup> Microdochium                     | 7 | 0 | 0 | 0 |
| Ascomycot Sordariom <sup>1</sup> Microascales                                                       | 7 | 0 | 0 | 0 |
| Ascomycot Eurotiomyc <sup>1</sup> Chaetothyr <sup>1</sup> Herpotrich Exophiala                      | 7 | 0 | 0 | 0 |
| Ascomycot Sordariom <sup>1</sup> Branch06                                                           | 7 | 0 | 0 | 0 |
| Ascomycot Eurotiomyc <sup>1</sup> Eurotiales Aspergillac <sup>1</sup> Aspergillus                   | 7 | 0 | 0 | 0 |
| Ascomycot Sordariom <sup>1</sup> Coniochaet <sup>1</sup> Coniochaet <sup>1</sup> Coniochaeta        | 5 | 0 | 2 | 0 |
| Ascomycot Eurotiomyc <sup>1</sup> Chaetothyriales                                                   | 4 | 0 | 0 | 0 |
| Ascomycot Saccharom <sup>1</sup> Saccharom <sup>1</sup> Dipodasca <sup>1</sup> Dipodascus           | 0 | 7 | 0 | 0 |
| Ascomycot Saccharom <sup>1</sup> Saccharom <sup>1</sup> Saccharom <sup>1</sup> Candida              | 0 | 7 | 0 | 0 |
| Ascomycota                                                                                          | 0 | 7 | 0 | 0 |
| Ascomycot Dothideom <sup>1</sup> Pleosporal <sup>1</sup> Lophiotren Atrocalyx                       | 0 | 7 | 0 | 0 |
| Ascomycot Dothideom <sup>1</sup> Capnodiales                                                        | 0 | 7 | 0 | 0 |
| Ascomycot Dothideom <sup>1</sup> Capnodiale <sup>1</sup> Mycospha <sup>1</sup> Exopassalora         | 0 | 2 | 5 | 0 |
| Ascomycot Sordariom <sup>1</sup> Sordariales Sordariales Ramophialophora                            | 0 | 0 | 7 | 0 |
| Ascomycot Saccharom <sup>1</sup> Saccharom <sup>1</sup> Saccharom <sup>1</sup> Diutina catenulata   | 0 | 0 | 3 | 0 |
| Ascomycota                                                                                          | 0 | 0 | 0 | 7 |
| Ascomycot Dothideom <sup>1</sup> Pleosporal <sup>1</sup> Didymosp <sup>1</sup> Paraconiothyrium     | 0 | 0 | 0 | 7 |
| Ascomycot Dothideom <sup>1</sup> Pleosporal <sup>1</sup> Pleosporales_fam_Incertae_sedis            | 0 | 0 | 0 | 0 |
| Ascomycot Dothideom <sup>1</sup> Acroperm <sup>1</sup> Acroperm <sup>1</sup> Leptodiscella          | 0 | 0 | 0 | 0 |
| Ascomycot Orbiliomyc <sup>1</sup> Orbiliales                                                        | 0 | 0 | 0 | 0 |
| Ascomycot Leotiomyc <sup>1</sup> Helotiales                                                         | 0 | 0 | 0 | 0 |
| Ascomycot Leotiomyc <sup>1</sup> Helotiales Helotiacea Articulospora                                | 0 | 0 | 0 | 0 |

|                                                                             |   |   |   |   |
|-----------------------------------------------------------------------------|---|---|---|---|
| Ascomycot Sordariomycetes Hypocreales Hypocreales Acremonium                | 0 | 0 | 0 | 0 |
| Ascomycota                                                                  | 0 | 0 | 0 | 0 |
| Ascomycot Saccharomycetes Saccharomycetes Candida                           | 0 | 0 | 0 | 0 |
| Ascomycot Sordariomycetes Xylariales Xylariales_ Castanediella              | 0 | 0 | 0 | 0 |
| Ascomycot Eurotiomycetes Eurotiales Aspergillaceae Penicillium              | 0 | 0 | 0 | 0 |
| Ascomycot Sordariomycetes Hypocreales Hypocreales Acremonium                | 0 | 0 | 0 | 0 |
| Ascomycot Pezizomycetes Pezizales Pyrenopezizales Sphaerospora              | 0 | 0 | 0 | 0 |
| Ascomycot Eurotiomycetes Eurotiales Aspergillaceae Aspergillus              | 0 | 0 | 0 | 0 |
| Ascomycot Dothideomycetes Pleosporales Pleosporales Curvularia              | 0 | 0 | 0 | 0 |
| Ascomycot Dothideomycetes Pleosporales Pleosporales Longipedicellata        | 0 | 0 | 0 | 0 |
| Ascomycot Sordariomycetes Hypocreales Hypocreales Trichoderma               | 0 | 0 | 0 | 0 |
| Ascomycot Sordariomycetes Hypocreales Nectriaceae                           | 0 | 0 | 0 | 0 |
| Ascomycot Archaeorhizomycetes                                               | 0 | 0 | 0 | 0 |
| Ascomycot Dothideomycetes Pleosporales Cucurbitales Pyrenochaetopsis        | 0 | 0 | 0 | 0 |
| Ascomycot Sordariomycetes Glomerella Glomerellaceae                         | 0 | 0 | 0 | 0 |
| Ascomycota                                                                  | 0 | 0 | 0 | 0 |
| Ascomycot Eurotiomycetes Eurotiales Aspergillaceae Aspergillus              | 0 | 0 | 0 | 0 |
| Ascomycot Dothideomycetes Capnodiales                                       | 0 | 0 | 0 | 0 |
| Ascomycot Dothideomycetes Capnodiales Mycosphaerellaceae                    | 0 | 0 | 0 | 0 |
| Ascomycot Dothideomycetes Capnodiales Teratosphaeriaceae                    | 0 | 0 | 0 | 0 |
| Ascomycot Leotiomyces                                                       | 0 | 0 | 0 | 0 |
| Ascomycota                                                                  | 0 | 0 | 0 | 0 |
| Ascomycot Eurotiomycetes Eurotiales Aspergillaceae Aspergillus japonicus    | 0 | 0 | 0 | 0 |
| Ascomycot Pezizomycetes Pezizomycetes Pezizomycetes Kramasamuha             | 0 | 0 | 0 | 0 |
| Ascomycot Sordariomycetes Xylariales Xylariaceae Daldinia                   | 0 | 0 | 0 | 0 |
| Ascomycot Dothideomycetes Pleosporales                                      | 0 | 0 | 0 | 0 |
| Ascomycot Sordariomycetes Hypocreales Nectriaceae Penicillifer              | 0 | 0 | 0 | 0 |
| Ascomycot Dothideomycetes Pleosporales Didymosporales Xenocamarosporium     | 0 | 0 | 0 | 0 |
| Ascomycot Sordariomycetes Sordariales Chaetomia Condenascus                 | 0 | 0 | 0 | 0 |
| Ascomycot Dothideomycetes Capnodiales Mycosphaerellaceae                    | 0 | 0 | 0 | 0 |
| Ascomycot Sordariomycetes Xylariales Xylariales_ Phialemoniopsis            | 0 | 0 | 0 | 0 |
| Ascomycot Leotiomyces Helotiales                                            | 0 | 0 | 0 | 0 |
| Ascomycot Archaeorhizomycetes                                               | 6 | 0 | 0 | 0 |
| Ascomycot Dothideomycetes Capnodiales Mycosphaerellaceae Paramycosphaerella | 6 | 0 | 0 | 0 |
| Ascomycot Pezizomycetes Pezizales Pyrenopezizales Pseudombrophila           | 6 | 0 | 0 | 0 |
| Ascomycot Sordariomycetes Hypocreales Nectriaceae Xenocylindrocladium       | 6 | 0 | 0 | 0 |
| Ascomycota                                                                  | 6 | 0 | 0 | 0 |
| Ascomycot Sordariomycetes Hypocreales Stachybotrys Striatibotrys            | 6 | 0 | 0 | 0 |
| Ascomycot Dothideomycetes Capnodiales Mycosphaerellaceae                    | 6 | 0 | 0 | 0 |
| Ascomycot Dothideomycetes Pleosporales Didymosporales Paracamarosporium     | 6 | 0 | 0 | 0 |
| Ascomycot Dothideomycetes Myriangiales                                      | 0 | 6 | 0 | 0 |
| Ascomycot Dothideomycetes Hysteriales                                       | 0 | 6 | 0 | 0 |
| Ascomycot Sordariomycetes Xylariales Amphisphaera Lepteutypa                | 0 | 6 | 0 | 0 |
| Ascomycot Saccharomycetes Saccharomycetes Pichiaceae Pichia                 | 0 | 6 | 0 | 0 |
| Ascomycot Dothideomycetes Capnodiales Cladosporium Toxicocladosporium       | 0 | 6 | 0 | 0 |
| Ascomycot Dothideomycetes Capnodiales Mycosphaerellaceae                    | 0 | 0 | 6 | 0 |
| Ascomycot Dothideomycetes Pleosporales Sporormia Preussia                   | 0 | 0 | 6 | 0 |
| Ascomycot Dothideomycetes Capnodiales Mycosphaerellaceae                    | 0 | 0 | 6 | 0 |
| Ascomycot Dothideomycetes Pleosporales Teichospora Magnibotryascoma         | 0 | 0 | 6 | 0 |
| Ascomycot Dothideomycetes Capnodiales Mycosphaerellaceae Exutisphaerella    | 0 | 0 | 0 | 6 |

|                                                                                           |   |   |   |   |
|-------------------------------------------------------------------------------------------|---|---|---|---|
| Ascomycot Dothideomycetes Capnodiales Teratosphaeriaceae                                  | 0 | 0 | 0 | 0 |
| Ascomycot Dothideomycetes Capnodiales Teratosphaeriaceae Acidiella                        | 0 | 0 | 0 | 0 |
| Ascomycot Sordariomycetes Microascales Microascales Canariomyces                          | 0 | 0 | 0 | 0 |
| Ascomycot Sordariomycetes Hypocreales Nectriaceae Neocosmospora                           | 0 | 0 | 0 | 0 |
| Ascomycot Dothideomycetes Pleosporales Didymellaceae                                      | 0 | 0 | 0 | 0 |
| Ascomycot Sordariomycetes Glomerella Plectosphaerellaceae                                 | 0 | 0 | 0 | 0 |
| Ascomycot Dothideomycetes Pleosporales Phaeosphaeria Neosetophoma                         | 0 | 0 | 0 | 0 |
| Ascomycot Dothideomycetes Capnodiales Mycosphaerella Mycosphaerellaceae                   | 0 | 0 | 0 | 0 |
| Ascomycot Sordariomycetes Hypocreales                                                     | 0 | 0 | 0 | 0 |
| Ascomycot Dothideomycetes Pleosporales Pleosporales Fusculina                             | 0 | 0 | 0 | 0 |
| Ascomycot Sordariomycetes Hypocreales Nectriaceae Gibberella                              | 0 | 0 | 0 | 0 |
| Ascomycot Leotiomyces Helotiales Helotiaceae Articulospora                                | 0 | 0 | 0 | 0 |
| Ascomycot Dothideomycetes Capnodiales Mycosphaerella Ramularia                            | 0 | 0 | 0 | 0 |
| Ascomycot Eurotiomycetes Eurotiales Aspergillaceae Phialomyces                            | 0 | 0 | 0 | 0 |
| Ascomycot Dothideomycetes Pleosporales                                                    | 0 | 0 | 0 | 0 |
| Ascomycot Dothideomycetes Capnodiales Mycosphaerella Phaeophleospora                      | 0 | 0 | 0 | 0 |
| Ascomycot Sordariomycetes Microascales                                                    | 0 | 0 | 0 | 0 |
| Ascomycot Sordariomycetes Sordariales Chaetomiaceae                                       | 0 | 0 | 0 | 0 |
| Ascomycot Leotiomyces Helotiales Hyaloscypha Hyaloscypha                                  | 0 | 0 | 0 | 0 |
| Ascomycot Eurotiomycetes                                                                  | 0 | 0 | 0 | 0 |
| Ascomycot Dothideomycetes Pleosporales Didymosphaeria Paraphaeosphaeria                   | 0 | 0 | 0 | 0 |
| Ascomycot Dothideomycetes Capnodiales Mycosphaerella Ramularia                            | 0 | 0 | 0 | 0 |
| Ascomycot Sordariomycetes Hypocreales Cordycipitaceae Simplicillium                       | 0 | 0 | 0 | 0 |
| Ascomycot Sordariomycetes Hypocreales Hypocreales Sarocladium                             | 0 | 0 | 0 | 0 |
| Ascomycot Sordariomycetes                                                                 | 0 | 0 | 0 | 0 |
| Ascomycot Eurotiomycetes Phaeomonium Phaeomonieaceae                                      | 0 | 0 | 0 | 0 |
| Ascomycot Eurotiomycetes Eurotiales Trichocomma Talaromyces                               | 0 | 0 | 0 | 0 |
| Ascomycot Sordariomycetes Xylariales Apiosporaceae                                        | 0 | 0 | 0 | 0 |
| Ascomycot Dothideomycetes Capnodiales Mycosphaerella Paramycosphaerella                   | 0 | 0 | 0 | 0 |
| Ascomycot Sordariomycetes Sordariales Helminthosporium Spadicoides                        | 0 | 0 | 0 | 0 |
| Ascomycot Eurotiomycetes Chaetothyriales Herpotrichum Exophiala                           | 0 | 0 | 0 | 0 |
| Ascomycot Sordariomycetes Hypocreales                                                     | 0 | 0 | 0 | 0 |
| Ascomycot Dothideomycetes Pleosporales Pleosporales Stemphylium                           | 0 | 0 | 0 | 0 |
| Ascomycot Sordariomycetes Hypocreales Nectriaceae Gliosphaeria Gliosphaerellaceae         | 0 | 0 | 0 | 0 |
| Ascomycot Sordariomycetes Hypocreales Nectriaceae Ilyonectria                             | 0 | 0 | 0 | 0 |
| Ascomycot Archaeorhizomycetes Archaeorhizomycetes Archaeorhizomycetes Archaeorhizomycetes | 0 | 0 | 0 | 0 |
| Ascomycot Sordariomycetes Hypocreales Bionectriaceae                                      | 0 | 0 | 0 | 0 |
| Ascomycot Sordariomycetes Sordariales                                                     | 0 | 0 | 0 | 0 |
| Ascomycot Dothideomycetes Capnodiales Teratosphaeriaceae                                  | 0 | 0 | 0 | 0 |
| Ascomycot Eurotiomycetes Chaetothyriales                                                  | 0 | 0 | 0 | 0 |
| Ascomycot Sordariomycetes Hypocreales Cordycipitaceae Simplicillium                       | 0 | 0 | 0 | 0 |
| Ascomycot Sordariomycetes Diaporthales Diaporthaceae Diaporthe                            | 0 | 0 | 0 | 0 |
| Ascomycot Saccharomycetes Saccharomycetes Debaryomycetes Hyphopichia                      | 5 | 0 | 0 | 0 |
| Ascomycot Dothideomycetes Capnodiales                                                     | 5 | 0 | 0 | 0 |
| Ascomycot Sordariomycetes Xylariales                                                      | 5 | 0 | 0 | 0 |
| Ascomycot Dothideomycetes Pleosporales Cucurbitaria Neocucurbitaria                       | 5 | 0 | 0 | 0 |
| Ascomycot Sordariomycetes Xylariales Coniocyba Coniocyba                                  | 5 | 0 | 0 | 0 |
| Ascomycot Dothideomycetes                                                                 | 5 | 0 | 0 | 0 |
| Ascomycot Sordariomycetes Hypocreales Bionectriaceae Gliomastix                           | 5 | 0 | 0 | 0 |
| Ascomycot Sordariomycetes Hypocreales                                                     | 2 | 0 | 3 | 0 |

|                                                                              |   |   |   |   |
|------------------------------------------------------------------------------|---|---|---|---|
| Ascomycot Dothideomycetes Capnodiales Mycosphaerellaceae                     | 0 | 5 | 0 | 0 |
| Ascomycot Dothideomycetes Pleosporales                                       | 0 | 5 | 0 | 0 |
| Ascomycot Sordariomycetes Branch06                                           | 0 | 5 | 0 | 0 |
| Ascomycot Pezizomycetes Pezizales Pyrenopezizales Aleuria                    | 0 | 5 | 0 | 0 |
| Ascomycot Sordariomycetes Xylariales Hypoxylaceae Hypomontagnella            | 0 | 5 | 0 | 0 |
| Ascomycot Sordariomycetes Hypocreales Nectriaceae Bisfusarium                | 0 | 5 | 0 | 0 |
| Ascomycot Sordariomycetes Hypocreales Hypocreales Chlamydosporium            | 0 | 5 | 0 | 0 |
| Ascomycot Sordariomycetes Hypocreales                                        | 0 | 5 | 0 | 0 |
| Ascomycot Eurotiomycetes Eurotiales Aspergillaceae Penicillium               | 0 | 5 | 0 | 0 |
| Ascomycot Leotiomycetes Helotiales Chaetomiales Pilidium                     | 0 | 5 | 0 | 0 |
| Ascomycot Eurotiomycetes Eurotiales Aspergillaceae Penicillium               | 0 | 5 | 0 | 0 |
| Ascomycot Sordariomycetes Sordariales Chaetomiaceae                          | 0 | 5 | 0 | 0 |
| Ascomycot Sordariomycetes Hypocreales Cordycipitaceae Engyodontium           | 0 | 5 | 0 | 0 |
| Ascomycot Dothideomycetes Pleosporales Didymosphaeriaceae                    | 0 | 0 | 5 | 0 |
| Ascomycot Eurotiomycetes Chaetothiales Chaetothiales Strelitziana            | 0 | 0 | 5 | 0 |
| Ascomycot Arthoniomycetes Lichenosticta Phaeococcidiopsis Phaeococcidiomyces | 0 | 0 | 5 | 0 |
| Ascomycot Eurotiomycetes Chaetothiales                                       | 0 | 0 | 5 | 0 |
| Ascomycot Dothideomycetes Pleosporales Lophiostomales Pseudolophiostoma      | 0 | 0 | 5 | 0 |
| Ascomycot Dothideomycetes Capnodiales Teratosphaeriaceae                     | 0 | 0 | 5 | 0 |
| Ascomycot Dothideomycetes Botryosphaeriales Aplosporella Aplosporella        | 0 | 0 | 5 | 0 |
| Ascomycot Leotiomycetes Helotiales                                           | 0 | 0 | 3 | 0 |
| Ascomycot Eurotiomycetes Eurotiales Aspergillaceae Penicillium               | 0 | 0 | 0 | 5 |
| Ascomycot Sordariomycetes Hypocreales Nectriaceae Ilyonectria                | 0 | 0 | 0 | 5 |
| Ascomycot Orbiliomycetes Orbiliales Orbiliaceae Orbilia                      | 0 | 0 | 0 | 5 |
| Ascomycot Sordariomycetes Xylariales Microdochiaceae                         | 0 | 0 | 0 | 5 |
| Ascomycot Dothideomycetes Capnodiales Teratosphaeriales Hyweljonesia         | 0 | 0 | 0 | 0 |
| Ascomycot Dothideomycetes Pleosporales Periconiaceae Periconia               | 0 | 0 | 0 | 0 |
| Ascomycot Leotiomycetes                                                      | 0 | 0 | 0 | 0 |
| Ascomycot Sordariomycetes Xylariales Xylariaceae Anthostomella               | 0 | 0 | 0 | 0 |
| Ascomycot Sordariomycetes Diaporthales Diaporthaceae Diaporthe               | 0 | 0 | 0 | 0 |
| Ascomycot Dothideomycetes Pleosporales Pleosporaceae Stemphylium             | 0 | 0 | 0 | 0 |
| Ascomycot Dothideomycetes Capnodiales                                        | 0 | 0 | 0 | 0 |
| Ascomycot Sordariomycetes Hypocreales Hypocreales Trichoderma citrinoviride  | 0 | 0 | 0 | 0 |
| Ascomycot Dothideomycetes Pleosporales Leptosphaeriaceae Ophiobolus          | 0 | 0 | 0 | 0 |
| Ascomycot Sordariomycetes Microascales Halosphaeriales Remispora             | 0 | 0 | 0 | 0 |
| Ascomycot Leotiomycetes Helotiales Helotiales Cadophora                      | 0 | 0 | 0 | 0 |
| Ascomycot Sordariomycetes Chaetosphaeriales Chaetosphaeriaceae               | 0 | 0 | 0 | 0 |
| Ascomycot Dothideomycetes Pleosporales Teichosporaceae Magnibotryascoma      | 0 | 0 | 0 | 0 |
| Ascomycot Dothideomycetes Pleosporales Didymosphaeriaceae Paraconiothyrium   | 0 | 0 | 0 | 0 |
| Ascomycot Sordariomycetes Hypocreales                                        | 0 | 0 | 0 | 0 |
| Ascomycot Sordariomycetes Sordariales                                        | 0 | 0 | 0 | 0 |
| Ascomycot Sordariomycetes Branch06                                           | 0 | 0 | 0 | 0 |
| Ascomycot Pezizomycetes Pezizales Ascobolaceae Ascobolus                     | 0 | 0 | 0 | 0 |
| Ascomycot Eurotiomycetes Chaetothiales Chaetothiales Ceramothyrium           | 0 | 0 | 0 | 0 |
| Ascomycot Dothideomycetes Pleosporales Phaeosphaeriales Setophoma            | 0 | 0 | 0 | 0 |
| Ascomycot Eurotiomycetes Onygenales Onygenales Zeloasperisporium             | 0 | 0 | 0 | 0 |
| Ascomycot Dothideomycetes                                                    | 0 | 0 | 0 | 0 |
| Ascomycot Leotiomycetes Helotiales Dermateaceae Mollisia                     | 0 | 0 | 0 | 0 |
| Ascomycot Eurotiomycetes Chaetothiales                                       | 0 | 0 | 0 | 0 |
| Ascomycot Dothideomycetes Capnodiales Mycosphaerellaceae                     | 0 | 0 | 0 | 0 |

|                               |              |                    |                   |   |   |   |   |
|-------------------------------|--------------|--------------------|-------------------|---|---|---|---|
| Ascomycot Sordariom           | Xylariales   | Sporocada          | Pestalotiopsis    | 0 | 0 | 0 | 0 |
| Ascomycot Eurotiomy           | Eurotiales   | Aspergillac        | Aspergillus       | 0 | 0 | 0 | 0 |
| Ascomycot Dothideon           | Pleosporal   | Phaeospha          | Wojnowiciella     | 0 | 0 | 0 | 0 |
| Ascomycot Leotiomy            | Helotiales   | Tricladiace        | Mycofalcella      | 0 | 0 | 0 | 0 |
| Ascomycot Dothideon           | Pleosporal   | Phaeospha          | Leptospora        | 0 | 0 | 0 | 0 |
| Ascomycot Sordariom           | Xylariales   | Xylariaceae        | Xylaria           | 0 | 0 | 0 | 0 |
| Ascomycot Eurotiomy           | Eurotiales   | Trichocom          | Talaromyces       | 0 | 0 | 0 | 0 |
| Ascomycot Dothideon           | Pleosporal   | Phaeospha          | Leptospora        | 0 | 0 | 0 | 0 |
| Ascomycot Leotiomy            | Helotiales   | Helotiaceae        | Scytalidium       | 0 | 0 | 0 | 0 |
| Ascomycot Sordariom           | Hypocreale   | Hypocreale         | Emericellopsis    | 0 | 0 | 0 | 0 |
| Ascomycot Eurotiomy           | Chaetothy    | Chaetothy          | Strelitziana      | 0 | 0 | 0 | 0 |
| Ascomycot Archaeorhi          | Archaeorhi   | Archaeorhi         | Archaeorhizomyces | 0 | 0 | 0 | 0 |
| Ascomycot Sordariom           | Hypocreale   | Ophiocord          | Ophiocordyceps    | 0 | 0 | 0 | 0 |
| Ascomycot Sordariom           | Hypocreales  |                    |                   | 0 | 0 | 0 | 0 |
| Ascomycot Dothideon           | Capnodiale   | Mycospha           | Phaeophleospora   | 0 | 0 | 0 | 0 |
| Ascomycot Sordariom           | Sordariales  | Chaetomia          | Botryotrichum     | 0 | 0 | 0 | 0 |
| Ascomycot Dothideon           | Capnodiale   | Teratosphaeriaceae |                   | 0 | 0 | 0 | 0 |
| Ascomycot Sordariom           | Sordariales  | Lasiosphae         | Schizothecium     | 0 | 0 | 0 | 0 |
| Ascomycot Sordariom           | Microascae   | Microascae         | Scopulariopsis    | 0 | 0 | 0 | 0 |
| Ascomycot Dothideon           | Capnodiale   | Mycospha           | Neoceratosperma   | 0 | 0 | 0 | 0 |
| Ascomycota                    |              |                    |                   | 0 | 0 | 0 | 0 |
| Ascomycot Dothideon           | Capnodiales  |                    |                   | 4 | 0 | 0 | 0 |
| Ascomycot Sordariom           | Microascae   | Microascae         | Lophotrichus      | 4 | 0 | 0 | 0 |
| Ascomycot Archaeorhizomycetes |              |                    |                   | 4 | 0 | 0 | 0 |
| Ascomycot Dothideon           | Pleosporal   | Melanommataceae    |                   | 4 | 0 | 0 | 0 |
| Ascomycot Dothideon           | Pleosporal   | Pleosporac         | Alternaria        | 4 | 0 | 0 | 0 |
| Ascomycot Sordariom           | Diaporthal   | Cryphonectriaceae  |                   | 4 | 0 | 0 | 0 |
| Ascomycot Dothideon           | Pleosporal   | Massarina          | Stagonospora      | 4 | 0 | 0 | 0 |
| Ascomycot Dothideon           | Pleosporal   | Cucurbitari        | Pyrenochaeta      | 4 | 0 | 0 | 0 |
| Ascomycot Sordariom           | Glomerella   | Glomerella         | Colletotrichum    | 4 | 0 | 0 | 0 |
| Ascomycot Eurotiomy           | Eurotiales   | Aspergillac        | Aspergillus       | 4 | 0 | 0 | 0 |
| Ascomycot Dothideon           | Dothideale   | Dothiorace         | Hormonema         | 4 | 0 | 0 | 0 |
| Ascomycot Xylonomyc           | GS34         |                    |                   | 4 | 0 | 0 | 0 |
| Ascomycot Dothideon           | Botryospha   | Botryospha         | Neofusicoccum     | 0 | 4 | 0 | 0 |
| Ascomycot Dothideon           | Dothideon    | Dothideon          | Peltaster         | 0 | 4 | 0 | 0 |
| Ascomycot Eurotiomy           | Chaetothy    | Chaetothyriaceae   |                   | 0 | 4 | 0 | 0 |
| Ascomycot Dothideon           | Capnodiale   | Teratosphaeriaceae |                   | 0 | 4 | 0 | 0 |
| Ascomycot Sordariom           | Hypocreale   | Hypocreac          | Trichoderma       | 0 | 4 | 0 | 0 |
| Ascomycot Saccharom           | Saccharom    | Trichomon          | Blastobotrys      | 0 | 4 | 0 | 0 |
| Ascomycot Dothideon           | Venturiale   | Sympoveni          | Neocoleroa        | 0 | 4 | 0 | 0 |
| Ascomycot Lecanorom           | Ostropales   |                    |                   | 0 | 2 | 0 | 0 |
| Ascomycot Dothideon           | Pleosporales |                    |                   | 0 | 0 | 4 | 0 |
| Ascomycot Orbiliomyc          | Orbiliales   | Orbiliaceae        | Orbilina          | 0 | 0 | 4 | 0 |
| Ascomycot Dothideon           | Dothideale   | Dothiorace         | Hormonema         | 0 | 0 | 4 | 0 |
| Ascomycot Dothideon           | Capnodiale   | Teratosphaeriaceae |                   | 0 | 0 | 4 | 0 |
| Ascomycot Dothideon           | Pleosporal   | Pleosporac         | Alternaria        | 0 | 0 | 4 | 0 |
| Ascomycot Dothideon           | Botryospha   | Botryospha         | Pseudofusicoccum  | 0 | 0 | 4 | 0 |
| Ascomycot Dothideon           | Pleosporal   | Didymospha         | Pseudopithomyces  | 0 | 0 | 4 | 0 |
| Ascomycot Sordariom           | Sordariales  |                    |                   | 0 | 0 | 0 | 4 |
| Ascomycot Sordariom           | Hypocreale   | Nectriaceae        | Mariannaea        | 0 | 0 | 0 | 4 |

|                                                                        |   |   |   |   |
|------------------------------------------------------------------------|---|---|---|---|
| Ascomycot Sordariom: Hypocreale Nectriaceae Cylindrocladiella          | 0 | 0 | 0 | 4 |
| Ascomycot Dothideom: Pleosporale Didymellaceae Neoascochyta            | 0 | 0 | 0 | 4 |
| Ascomycot Lecanorom: Ostropales Gomphillaceae                          | 0 | 0 | 0 | 4 |
| Ascomycot Dothideom: Capnodiale Mycosphaerellaceae                     | 0 | 0 | 0 | 4 |
| Ascomycot Eurotiomy: Onygenale Onygenace Aphanoascus                   | 0 | 0 | 0 | 0 |
| Ascomycot Dothideom: Pleosporale Cucurbitaria Pyrenochaetopsis         | 0 | 0 | 0 | 0 |
| Ascomycot Dothideom: Capnodiales                                       | 0 | 0 | 0 | 0 |
| Ascomycot Sordariom: Xylariales Apiosporaceae Apiospora                | 0 | 0 | 0 | 0 |
| Ascomycot Dothideom: Venturiales Sympoveni Neocoleroa                  | 0 | 0 | 0 | 0 |
| Ascomycot Eurotiomy: Chaetothya Chaetothya Strelitziana                | 0 | 0 | 0 | 0 |
| Ascomycot Eurotiomy: Chaetothyriales                                   | 0 | 0 | 0 | 0 |
| Ascomycot Sordariomycetes                                              | 0 | 0 | 0 | 0 |
| Ascomycot Eurotiomy: Eurotiales Aspergillaceae Aspergillus             | 0 | 0 | 0 | 0 |
| Ascomycota                                                             | 0 | 0 | 0 | 0 |
| Ascomycot Leotiomy: Helotiales Chaetomellaceae                         | 0 | 0 | 0 | 0 |
| Ascomycot Dothideom: Pleosporale Morosphaeriaceae                      | 0 | 0 | 0 | 0 |
| Ascomycot Sordariom: Xylariales Amphisphaeriaceae                      | 0 | 0 | 0 | 0 |
| Ascomycot Saccharom: Saccharom Saccharom Kazachstania                  | 0 | 0 | 0 | 0 |
| Ascomycot Sordariom: Hypocreale Bionectriaceae Bionectria              | 0 | 0 | 0 | 0 |
| Ascomycot Dothideom: Pleosporale Leptosphaeria Leptosphaeria           | 0 | 0 | 0 | 0 |
| Ascomycot Sordariom: Togniniales Togniniaceae Phaeoacremonium          | 0 | 0 | 0 | 0 |
| Ascomycot Saccharom: Saccharom Debaryomyces Hyphopichia                | 0 | 0 | 0 | 0 |
| Ascomycot Dothideom: Asterinales Parmularia Parmularia                 | 0 | 0 | 0 | 0 |
| Ascomycot Dothideom: Capnodiale Mycosphaeria Geastrumia                | 0 | 0 | 0 | 0 |
| Ascomycot Dothideom: Dothideales Aureobasidium Aureobasidium           | 0 | 0 | 0 | 0 |
| Ascomycot Eurotiomy: Chaetothya Chaetothyriaceae                       | 0 | 0 | 0 | 0 |
| Ascomycot Dothideom: Pleosporales                                      | 0 | 0 | 0 | 0 |
| Ascomycot Leotiomy: Rhytismataceae Rhytismataceae                      | 0 | 0 | 0 | 0 |
| Ascomycot Sordariom: Hypocreale Hypocreace Trichoderma                 | 0 | 0 | 0 | 0 |
| Ascomycot Dothideom: Capnodiale Teratosphaeria Penidiella              | 0 | 0 | 0 | 0 |
| Ascomycot Archaeorhizom: Archaeorhizom Archaeorhizom Archaeorhizomyces | 0 | 0 | 0 | 0 |
| Ascomycot Archaeorhizom: Archaeorhizom Archaeorhizom Archaeorhizomyces | 0 | 0 | 0 | 0 |
| Ascomycot Dothideom: Capnodiale Neodevriesia Neodevriesia              | 0 | 0 | 0 | 0 |
| Ascomycot Archaeorhizom: GS31                                          | 0 | 0 | 0 | 0 |
| Ascomycot Sordariom: Diaporthales Diaporthaceae Diaporthe              | 0 | 0 | 0 | 0 |
| Ascomycot Sordariom: Microascales Microascale Canariomyces             | 0 | 0 | 0 | 0 |
| Ascomycota                                                             | 0 | 0 | 0 | 0 |
| Ascomycot Dothideom: Capnodiale Mycosphaeria Phaeophleospora           | 0 | 0 | 0 | 0 |
| Ascomycot Sordariom: Xylariales Diatrypaceae Peroneutypa               | 0 | 0 | 0 | 0 |
| Ascomycot Dothideom: Pleosporale Pleosporaceae                         | 0 | 0 | 0 | 0 |
| Ascomycot Sordariomycetes                                              | 0 | 0 | 0 | 0 |
| Ascomycot Sordariomycetes                                              | 0 | 0 | 0 | 0 |
| Ascomycot Sordariomycetes                                              | 0 | 0 | 0 | 0 |
| Ascomycot Dothideom: Pleosporale Pleosporale Parapyrenochaeta          | 0 | 0 | 0 | 0 |
| Ascomycot Dothideom: Capnodiale Mycosphaeria Madagascariomyces         | 0 | 0 | 0 | 0 |
| Ascomycot Sordariom: Hypocreale Bionectriaceae Hydropisphaera          | 0 | 0 | 0 | 0 |
| Ascomycot Sordariom: Chaetosphaeriales                                 | 0 | 0 | 0 | 0 |
| Ascomycot Sordariom: Hypocreales                                       | 0 | 0 | 0 | 0 |
| Ascomycot Dothideom: Capnodiale Mycosphaeria Ramularia                 | 0 | 0 | 0 | 0 |
| Ascomycot Sordariom: Sordariales Chaetomia Humicola                    | 0 | 0 | 0 | 0 |

|                                                                           |   |   |   |   |
|---------------------------------------------------------------------------|---|---|---|---|
| Ascomycot Dothideomycetes Capnodiales Mycosphaerella Ramularia            | 0 | 0 | 0 | 0 |
| Ascomycot Dothideomycetes Capnodiales                                     | 0 | 0 | 0 | 0 |
| Ascomycot Sordariomycetes                                                 | 0 | 0 | 0 | 0 |
| Ascomycot Eurotiomycetes Phaeomoniellaceae                                | 0 | 0 | 0 | 0 |
| Ascomycot Sordariomycetes Xylariales                                      | 0 | 0 | 0 | 0 |
| Ascomycot Sordariomycetes Hypocreales Nectriaceae Fusicolla               | 0 | 0 | 0 | 0 |
| Ascomycot Dothideomycetes Capnodiales Teratosphaeria Catenulostroma       | 0 | 0 | 0 | 0 |
| Ascomycot Dothideomycetes Pleosporales Melanconium Melanodiplodia         | 3 | 0 | 0 | 0 |
| Ascomycot Sordariomycetes Hypocreales                                     | 3 | 0 | 0 | 0 |
| Ascomycot Sordariomycetes Xylariales Xylariaceae Xylaria                  | 3 | 0 | 0 | 0 |
| Ascomycot Pezizomycetes Pezizales Pezizales_f Trichobolus                 | 3 | 0 | 0 | 0 |
| Ascomycot Orbiliomycetes Orbiliales Orbiliaceae                           | 3 | 0 | 0 | 0 |
| Ascomycot Eurotiomycetes Onygenales Gymnoascus Gymnoascus                 | 3 | 0 | 0 | 0 |
| Ascomycot Dothideomycetes Pleosporales                                    | 3 | 0 | 0 | 0 |
| Ascomycot Eurotiomycetes                                                  | 3 | 0 | 0 | 0 |
| Ascomycot Eurotiomycetes Chaetothyriales                                  | 3 | 0 | 0 | 0 |
| Ascomycot Leotiomyces Helotiales                                          | 3 | 0 | 0 | 0 |
| Ascomycot Dothideomycetes                                                 | 3 | 0 | 0 | 0 |
| Ascomycot Sordariomycetes Hypocreales Ophiocordyceces Hirsutella          | 3 | 0 | 0 | 0 |
| Ascomycot Dothideomycetes Pleosporales Phaeosphaeria Phaeodothis          | 3 | 0 | 0 | 0 |
| Ascomycot Sordariomycetes Sordariales                                     | 3 | 0 | 0 | 0 |
| Ascomycot Sordariomycetes Xylariales Xylariaceae                          | 3 | 0 | 0 | 0 |
| Ascomycot Dothideomycetes Capnodiales Teratosphaeria Pseudoteratosphaeria | 3 | 0 | 0 | 0 |
| Ascomycot Sordariomycetes Chaetosphaeria Chaetosphaeriaceae               | 3 | 0 | 0 | 0 |
| Ascomycot Sordariomycetes Xylariales Xylariaceae Xylaria                  | 3 | 0 | 0 | 0 |
| Ascomycot Sordariomycetes Hypocreales                                     | 3 | 0 | 0 | 0 |
| Ascomycot Dothideomycetes Pleosporales Didymellaceae Neoascochyta         | 3 | 0 | 0 | 0 |
| Ascomycot Saccharomycetes Saccharomycetes Candida                         | 3 | 0 | 0 | 0 |
| Ascomycot Sordariomycetes                                                 | 3 | 0 | 0 | 0 |
| Ascomycota                                                                | 0 | 3 | 0 | 0 |
| Ascomycot Dothideomycetes Capnodiales                                     | 0 | 3 | 0 | 0 |
| Ascomycot Eurotiomycetes Onygenales Onygenales Spiromastix                | 0 | 3 | 0 | 0 |
| Ascomycot Sordariomycetes Sordariales Sordariales Ramophialophora         | 0 | 3 | 0 | 0 |
| Ascomycot Leotiomyces Helotiales Hyaloscyphaceae                          | 0 | 3 | 0 | 0 |
| Ascomycot Sordariomycetes                                                 | 0 | 3 | 0 | 0 |
| Ascomycot Dothideomycetes Capnodiales Capnodiales Arthrocatena            | 0 | 3 | 0 | 0 |
| Ascomycot Dothideomycetes Pleosporales Teichosporaceae                    | 0 | 3 | 0 | 0 |
| Ascomycot Sordariomycetes Sordariales Chaetomium Stolonocarpus            | 0 | 3 | 0 | 0 |
| Ascomycot Dothideomycetes Pleosporales Teichosporium Magnibotryascoma     | 0 | 3 | 0 | 0 |
| Ascomycot Dothideomycetes Capnodiales Teratosphaeria Penidiella           | 0 | 3 | 0 | 0 |
| Ascomycot Dothideomycetes Capnodiales Mycosphaerellaceae                  | 0 | 3 | 0 | 0 |
| Ascomycot Sordariomycetes Sordariales Chaetomium Botryotrichum            | 0 | 3 | 0 | 0 |
| Ascomycot Sordariomycetes Xylariales Sporocadaceae                        | 0 | 3 | 0 | 0 |
| Ascomycot Dothideomycetes Pleosporales Pleosporaceae Curvularia           | 0 | 3 | 0 | 0 |
| Ascomycot Pezizomycetes Pezizales Ascodesmiaceae Cephaliophora            | 0 | 3 | 0 | 0 |
| Ascomycot Sordariomycetes Sordariales Chaetomium Retroconis               | 0 | 3 | 0 | 0 |
| Ascomycot Sordariomycetes Hypocreales Nectriaceae                         | 0 | 3 | 0 | 0 |
| Ascomycot Dothideomycetes Pleosporales Didymellaceae                      | 0 | 3 | 0 | 0 |
| Ascomycot Taphrinomycetes Taphrinales Taphrinaceae Taphrina               | 0 | 0 | 3 | 0 |
| Ascomycot Eurotiomycetes Chaetothyriales Herpotrichum Exophiala           | 0 | 0 | 3 | 0 |

|                                                                                                      |   |   |   |   |
|------------------------------------------------------------------------------------------------------|---|---|---|---|
| Ascomycot Sordariom <sup>1</sup> Xylariales                                                          | 0 | 0 | 3 | 0 |
| Ascomycot Dothideom <sup>1</sup> Capnodiales                                                         | 0 | 0 | 3 | 0 |
| Ascomycot Sordariom <sup>1</sup> Chaetosph <sup>1</sup> Chaetosphaeriaceae                           | 0 | 0 | 3 | 0 |
| Ascomycot Dothideom <sup>1</sup> Venturiales <sup>1</sup> Symptoveni <sup>1</sup> Ochroconis         | 0 | 0 | 3 | 0 |
| Ascomycot Dothideom <sup>1</sup> Pleosporal <sup>1</sup> Pleosporac <sup>1</sup> Curvularia          | 0 | 0 | 3 | 0 |
| Ascomycot Leotiomy <sup>1</sup> Helotiales <sup>1</sup> Sclerotinia <sup>1</sup> Sclerotinia         | 0 | 0 | 3 | 0 |
| Ascomycot Dothideom <sup>1</sup> Capnodiale <sup>1</sup> Mycosphaerellaceae                          | 0 | 0 | 3 | 0 |
| Ascomycot Arthoniom <sup>1</sup> Lichenosti <sup>1</sup> Phaeococc <sup>1</sup> Phaeococcomyces      | 0 | 0 | 3 | 0 |
| Ascomycota                                                                                           | 0 | 0 | 3 | 0 |
| Ascomycot Dothideom <sup>1</sup> Pleosporal <sup>1</sup> Periconiac <sup>1</sup> Periconia           | 0 | 0 | 3 | 0 |
| Ascomycot Dothideom <sup>1</sup> Capnodiale <sup>1</sup> Teratosph <sup>1</sup> Devriesia            | 0 | 0 | 0 | 3 |
| Ascomycot Sordariom <sup>1</sup> Coniocha <sup>1</sup> Coniocha <sup>1</sup> Coniochaeta             | 0 | 0 | 0 | 3 |
| Ascomycot Eurotiomy <sup>1</sup> Eurotiales <sup>1</sup> Aspergillac <sup>1</sup> Penicillium        | 0 | 0 | 0 | 0 |
| Ascomycot Leotiomy <sup>1</sup> Helotiales                                                           | 0 | 0 | 0 | 0 |
| Ascomycot Dothideom <sup>1</sup> Capnodiale <sup>1</sup> Teratosphaeriaceae                          | 0 | 0 | 0 | 0 |
| Ascomycot Sordariom <sup>1</sup> Glomerella <sup>1</sup> Plectospha <sup>1</sup> Lectera             | 0 | 0 | 0 | 0 |
| Ascomycot Sordariom <sup>1</sup> Sordariales                                                         | 0 | 0 | 0 | 0 |
| Ascomycot Dothideom <sup>1</sup> Pleosporal <sup>1</sup> Phaeospha <sup>1</sup> Neosetophoma         | 0 | 0 | 0 | 0 |
| Ascomycot Leotiomy <sup>1</sup> Helotiales <sup>1</sup> Helotiales <sup>1</sup> Mirandina            | 0 | 0 | 0 | 0 |
| Ascomycot Sordariom <sup>1</sup> Xylariales <sup>1</sup> Sporocada <sup>1</sup> Neopestalotiopsis    | 0 | 0 | 0 | 0 |
| Ascomycot Dothideom <sup>1</sup> Capnodiale <sup>1</sup> Teratosph <sup>1</sup> Pseudoteratosphaeria | 0 | 0 | 0 | 0 |
| Ascomycot Sordariom <sup>1</sup> Diaporthal <sup>1</sup> Diaporthac <sup>1</sup> Diaporthe           | 0 | 0 | 0 | 0 |
| Ascomycot Eurotiomy <sup>1</sup> Chaetothyriales                                                     | 0 | 0 | 0 | 0 |
| Ascomycot Dothideom <sup>1</sup> Capnodiales                                                         | 0 | 0 | 0 | 0 |
| Ascomycot Laboulbeni <sup>1</sup> Pyxidiophorales                                                    | 0 | 0 | 0 | 0 |
| Ascomycota                                                                                           | 0 | 0 | 0 | 0 |
| Ascomycot Archaeorhizomycetes                                                                        | 0 | 0 | 0 | 0 |
| Ascomycot Dothideom <sup>1</sup> Capnodiales                                                         | 0 | 0 | 0 | 0 |
| Ascomycot Sordariom <sup>1</sup> Glomerella <sup>1</sup> Glomerella <sup>1</sup> Colletotrichum      | 0 | 0 | 0 | 0 |
| Ascomycot Sordariomycetes                                                                            | 0 | 0 | 0 | 0 |
| Ascomycot Dothideom <sup>1</sup> Capnodiale <sup>1</sup> Mycosphaerellaceae                          | 0 | 0 | 0 | 0 |
| Ascomycot Dothideom <sup>1</sup> Capnodiale <sup>1</sup> Cladospori <sup>1</sup> Cladosporium        | 0 | 0 | 0 | 0 |
| Ascomycot Dothideom <sup>1</sup> Asterinales <sup>1</sup> Parmularia <sup>1</sup> Parmularia         | 0 | 0 | 0 | 0 |
| Ascomycot Sordariom <sup>1</sup> Hypocreac <sup>1</sup> Nectriaceae <sup>1</sup> Phialoseptomonium   | 0 | 0 | 0 | 0 |
| Ascomycot Dothideom <sup>1</sup> Capnodiale <sup>1</sup> Mycospha <sup>1</sup> Madagascaromyces      | 0 | 0 | 0 | 0 |
| Ascomycot Sordariom <sup>1</sup> Hypocreales                                                         | 0 | 0 | 0 | 0 |
| Ascomycot Leotiomy <sup>1</sup> Helotiales <sup>1</sup> Sclerotinia <sup>1</sup> Botryotinia         | 0 | 0 | 0 | 0 |
| Ascomycot Saccharom <sup>1</sup> Saccharom <sup>1</sup> Dipodasca <sup>1</sup> Dipodascus            | 0 | 0 | 0 | 0 |
| Ascomycot Sordariom <sup>1</sup> Xylariales <sup>1</sup> Xylariaceae                                 | 0 | 0 | 0 | 0 |
| Ascomycot Dothideom <sup>1</sup> Capnodiales                                                         | 0 | 0 | 0 | 0 |
| Ascomycot Leotiomy <sup>1</sup> Helotiales <sup>1</sup> Helotiales <sup>1</sup> Leohumicola          | 0 | 0 | 0 | 0 |
| Ascomycot Dothideom <sup>1</sup> Pleosporales                                                        | 0 | 0 | 0 | 0 |
| Ascomycot Dothideom <sup>1</sup> Capnodiales                                                         | 0 | 0 | 0 | 0 |
| Ascomycot Archaeorhi <sup>1</sup> Archaeorhi <sup>1</sup> Archaeorhi <sup>1</sup> Archaeorhizomyces  | 0 | 0 | 0 | 0 |
| Ascomycot Sordariomycetes                                                                            | 0 | 0 | 0 | 0 |
| Ascomycot Saccharom <sup>1</sup> Saccharom <sup>1</sup> Saccharom <sup>1</sup> Hanseniaspora         | 0 | 0 | 0 | 0 |
| Ascomycot Dothideom <sup>1</sup> Pleosporal <sup>1</sup> Didymosp <sup>1</sup> Paracamarosporium     | 0 | 0 | 0 | 0 |
| Ascomycot Sordariom <sup>1</sup> Sordariales <sup>1</sup> Lasiosphae <sup>1</sup> Apiosordaria       | 0 | 0 | 0 | 0 |
| Ascomycot Dothideom <sup>1</sup> Pleosporal <sup>1</sup> Didymosphaeriaceae                          | 0 | 0 | 0 | 0 |
| Ascomycot Dothideom <sup>1</sup> Asterinales <sup>1</sup> Parmularia <sup>1</sup> Parmularia         | 0 | 0 | 0 | 0 |



|                                                                            |   |   |   |   |
|----------------------------------------------------------------------------|---|---|---|---|
| Ascomycota                                                                 | 0 | 0 | 0 | 0 |
| Ascomycot Pezizomyci Pezizales Ascobolaceae Ascobolus                      | 0 | 0 | 0 | 0 |
| Ascomycot Sordariomyci Hypocreales Bionectriaceae                          | 0 | 0 | 0 | 0 |
| Ascomycot Archaeorhizomyci Archaeorhizomyci Archaeorhizomyces              | 0 | 0 | 0 | 0 |
| Ascomycot Archaeorhizomyci Archaeorhizomyci Archaeorhizomyces              | 0 | 0 | 0 | 0 |
| Ascomycot Dothideomycetes Pleosporales Phaeosphaeria Neosulcatispora       | 0 | 0 | 0 | 0 |
| Ascomycot Sordariomyci Coniochaetales Coniochaetales Coniochaeta           | 0 | 0 | 0 | 0 |
| Ascomycot Sordariomyci Xylariales                                          | 0 | 0 | 0 | 0 |
| Ascomycot Sordariomyci Xylariales Xylariaceae Xylaria                      | 0 | 0 | 0 | 0 |
| Ascomycot Dothideomycetes Pleosporales Didymellaceae Neodidymella          | 0 | 0 | 0 | 0 |
| Ascomycot Sordariomyci Diaporthales                                        | 0 | 0 | 0 | 0 |
| Ascomycot Dothideomycetes Pleosporales Cucurbitaria Pyrenochaetopsis       | 0 | 0 | 0 | 0 |
| Ascomycot Dothideomycetes                                                  | 0 | 0 | 0 | 0 |
| Ascomycot Saccharomycetes Saccharomycetes Saccharomycetes Candida          | 0 | 0 | 0 | 0 |
| Ascomycot Saccharomycetes Saccharomycetes Dipodascaceae                    | 0 | 0 | 0 | 0 |
| Ascomycot Dothideomycetes Dothideomycetes Dothideomycetes Radulidium       | 0 | 0 | 0 | 0 |
| Ascomycot Sordariomyci Xylariales Microdochium Microdochium                | 0 | 0 | 0 | 0 |
| Ascomycot Sordariomyci Diaporthales                                        | 0 | 0 | 0 | 0 |
| Ascomycot Dothideomycetes Capnodiales Mycosphaerellaceae                   | 0 | 0 | 0 | 0 |
| Ascomycota                                                                 | 0 | 0 | 0 | 0 |
| Ascomycot Dothideomycetes Capnodiales Mycosphaerellaceae                   | 0 | 0 | 0 | 0 |
| Ascomycot Sordariomyci Xylariales Amphispheeria Amphispheeria              | 0 | 0 | 0 | 0 |
| Ascomycot Dothideomycetes Capnodiales                                      | 0 | 0 | 0 | 0 |
| Ascomycot Sordariomyci Xylariales Xylariaceae                              | 0 | 0 | 0 | 0 |
| Ascomycot Dothideomycetes Pleosporales Didymosphaeria Paraconiothyrium     | 0 | 0 | 0 | 0 |
| Ascomycot Sordariomyci Diaporthales Diaporthaceae Diaporthe                | 0 | 0 | 0 | 0 |
| Ascomycot Sordariomyci Hypocreales Nectriaceae                             | 0 | 0 | 0 | 0 |
| Ascomycot Dothideomycetes Asterinales Parmularia Parmularia                | 0 | 0 | 0 | 0 |
| Ascomycot Eurotiomycetes Eurotiales Trichocomycetes Talaromyces            | 0 | 0 | 0 | 0 |
| Ascomycot Dothideomycetes Asterinales Parmularia Parmularia                | 0 | 0 | 0 | 0 |
| Ascomycot Sordariomyci Hypocreales Nectriaceae Neocosmospora               | 0 | 0 | 0 | 0 |
| Ascomycot Dothideomycetes Capnodiales                                      | 0 | 0 | 0 | 0 |
| Ascomycot Eurotiomycetes Chaetothiales Herpotrichiellaceae                 | 0 | 0 | 0 | 0 |
| Ascomycot Dothideomycetes Tubeufiales Wiesneriella Spissiomyces            | 0 | 0 | 0 | 0 |
| Ascomycot Archaeorhizomyci Archaeorhizomyci Archaeorhizomyces              | 0 | 0 | 0 | 0 |
| Ascomycot Sordariomyci Hypocreales Hypocreaceae Monocillium                | 0 | 0 | 0 | 0 |
| Ascomycot Saccharomycetes Saccharomycetes Phaffomycetes Wickerhamomyces    | 0 | 0 | 0 | 0 |
| Ascomycot Sordariomyci Hypocreales Clavicipitaceae                         | 2 | 0 | 0 | 0 |
| Ascomycot Eurotiomycetes Chaetothiales Herpotrich Coniosporium             | 2 | 0 | 0 | 0 |
| Ascomycot Leotiomyces Helotiales                                           | 2 | 0 | 0 | 0 |
| Ascomycot Dothideomycetes Pleosporales Phaeosphaeria Leptospora            | 2 | 0 | 0 | 0 |
| Ascomycot Lecanoromycetes Lecanorales Ramboldia Ramboldia                  | 2 | 0 | 0 | 0 |
| Ascomycot Dothideomycetes Capnodiales Teratosphaeriaceae                   | 2 | 0 | 0 | 0 |
| Ascomycot Sordariomyci Branch06                                            | 2 | 0 | 0 | 0 |
| Ascomycot Sordariomyci Xylariales Microdochium Selenodriella               | 2 | 0 | 0 | 0 |
| Ascomycot Leotiomyces Helotiales Hyaloscypha Proliferodiscus               | 2 | 0 | 0 | 0 |
| Ascomycot Dothideomycetes Pleosporales Neomassaria Neomassaria thailandica | 2 | 0 | 0 | 0 |
| Ascomycot Dothideomycetes Capnodiales                                      | 2 | 0 | 0 | 0 |
| Ascomycot Sordariomyci Xylariales Sporocada Neopestalotiopsis              | 2 | 0 | 0 | 0 |
| Ascomycot Dothideomycetes Capnodiales                                      | 2 | 0 | 0 | 0 |

|                                                                       |   |   |   |   |
|-----------------------------------------------------------------------|---|---|---|---|
| Ascomycot Sordariomycetes Hypocreales                                 | 2 | 0 | 0 | 0 |
| Ascomycot Dothideomycetes Capnodiales Mycosphaerella Stomiopeltis     | 2 | 0 | 0 | 0 |
| Ascomycot Pezizomycetes Pezizales Pyrenopeziza Scutellinia            | 2 | 0 | 0 | 0 |
| Ascomycot Dothideomycetes Capnodiales Mycosphaerellaceae              | 0 | 2 | 0 | 0 |
| Ascomycot Dothideomycetes Myriangiales                                | 0 | 2 | 0 | 0 |
| Ascomycot Dothideomycetes Pleosporales Lophiostoma Flabellascoma      | 0 | 2 | 0 | 0 |
| Ascomycot Eurotiomycetes Eurotiales Trichocomma Thermomyces           | 0 | 2 | 0 | 0 |
| Ascomycot Eurotiomycetes Chaetothyriales                              | 0 | 2 | 0 | 0 |
| Ascomycot Leotiomyces Helotiales Helotiaceae Articulospora            | 0 | 2 | 0 | 0 |
| Ascomycot Dothideomycetes Capnodiales Teratosphaeriaceae              | 0 | 2 | 0 | 0 |
| Ascomycot Dothideomycetes Capnodiales Mycosphaerellaceae              | 0 | 2 | 0 | 0 |
| Ascomycot Sordariomycetes Sordariales Chaetomiaceae                   | 0 | 2 | 0 | 0 |
| Ascomycot Eurotiomycetes Chaetothyriales                              | 0 | 2 | 0 | 0 |
| Ascomycot Dothideomycetes Asterinales Parmularia Parmularia           | 0 | 2 | 0 | 0 |
| Ascomycot Pezizomycetes Pezizales Ascodesmia Cephaliophora            | 0 | 2 | 0 | 0 |
| Ascomycot Sordariomycetes Hypocreales Nectriaceae Volutella           | 0 | 2 | 0 | 0 |
| Ascomycota                                                            | 0 | 2 | 0 | 0 |
| Ascomycot Sordariomycetes Sordariales                                 | 0 | 2 | 0 | 0 |
| Ascomycot Eurotiomycetes Onygenales Gymnoascus Leucothecium           | 0 | 2 | 0 | 0 |
| Ascomycot Sordariomycetes Diaporthales                                | 0 | 2 | 0 | 0 |
| Ascomycot Sordariomycetes Xylariales Sporocadaceae                    | 0 | 2 | 0 | 0 |
| Ascomycot Sordariomycetes Sordariales Chaetomia Collariella           | 0 | 2 | 0 | 0 |
| Ascomycot Dothideomycetes Pleosporales Sporormiella Preussia          | 0 | 2 | 0 | 0 |
| Ascomycot Dothideomycetes Capnodiales Mycosphaerellaceae              | 0 | 2 | 0 | 0 |
| Ascomycot Dothideomycetes Pleosporales Teichospora Magnibotryascoma   | 0 | 0 | 2 | 0 |
| Ascomycot Dothideomycetes                                             | 0 | 0 | 2 | 0 |
| Ascomycot Sordariomycetes Sordariales Sordariace Gelasinospora        | 0 | 0 | 2 | 0 |
| Ascomycot Sordariomycetes Magnaporthe Magnaporthe Magnaporthe         | 0 | 0 | 2 | 0 |
| Ascomycot Eurotiomycetes Onygenales Ajellomycetaceae                  | 0 | 0 | 2 | 0 |
| Ascomycot Sordariomycetes Glomerella Plectosphaera Paragibbellulopsis | 0 | 0 | 2 | 0 |
| Ascomycot Lecanoromycetes Caliciales Caliciaceae                      | 0 | 0 | 2 | 0 |
| Ascomycot Dothideomycetes Capnodiales                                 | 0 | 0 | 2 | 0 |
| Ascomycota                                                            | 0 | 0 | 2 | 0 |
| Ascomycot Dothideomycetes Capnodiales Teratosphaeriaceae              | 0 | 0 | 2 | 0 |
| Ascomycot Dothideomycetes Hysteriales Hysteriaceae Rhytidhysterion    | 0 | 0 | 2 | 0 |
| Ascomycot Dothideomycetes Capnodiales Mycosphaerella Ramularia        | 0 | 0 | 2 | 0 |
| Ascomycot Dothideomycetes Capnodiales Teratosphaeria Devriesia        | 0 | 0 | 2 | 0 |
| Ascomycot Orbiliomycetes Orbiliales Orbiliaceae Arthrobotrya          | 0 | 0 | 2 | 0 |
| Ascomycot Dothideomycetes                                             | 0 | 0 | 2 | 0 |
| Ascomycot Dothideomycetes Capnodiales Teratosphaeriaceae              | 0 | 0 | 2 | 0 |
| Ascomycot Dothideomycetes Myriangiales Elsinoaceae                    | 0 | 0 | 2 | 0 |
| Ascomycot Dothideomycetes Pleosporales Didymosphaeria Montagnula      | 0 | 0 | 2 | 0 |
| Ascomycot Sordariomycetes Hypocreales Cordycipitaceae Lecanicillium   | 0 | 0 | 2 | 0 |
| Ascomycot Dothideomycetes Capnodiales Teratosphaeriaceae              | 0 | 0 | 2 | 0 |
| Ascomycot Sordariomycetes Hypocreales Hypocreaceae Cladobotryum       | 0 | 0 | 0 | 2 |
| Ascomycot Saccharomycetes Saccharomycetes Pichiaceae Pichia           | 0 | 0 | 0 | 2 |
| Ascomycot Dothideomycetes Myriangiales                                | 0 | 0 | 0 | 2 |
| Ascomycot Sordariomycetes Chaetosphaeria Chaetosphaeriaceae           | 0 | 0 | 0 | 2 |
| Ascomycot Dothideomycetes Capnodiales Mycosphaerella Exopassalora     | 0 | 0 | 0 | 2 |
| Ascomycot Sordariomycetes Hypocreales Clavicipitaceae Metarhizium     | 0 | 0 | 0 | 2 |

|                                                                                     |   |   |   |   |
|-------------------------------------------------------------------------------------|---|---|---|---|
| Ascomycot Dothideomycetes Capnodiales Schizothyriaceae Johansonia                   | 0 | 0 | 0 | 0 |
| Ascomycot Sordariomycetes Hypocreales Bionectriaceae Valsonelectria                 | 0 | 0 | 0 | 0 |
| Ascomycot Dothideomycetes Capnodiales Mycosphaeraceae Phaeophleospora               | 0 | 0 | 0 | 0 |
| Ascomycot Sordariomycetes Diaporthales                                              | 0 | 0 | 0 | 0 |
| Ascomycot Eurotiomycetes Chaetothyriales Herpotrichum Exophiala equina              | 0 | 0 | 0 | 0 |
| Ascomycot Sordariomycetes                                                           | 0 | 0 | 0 | 0 |
| Ascomycot Dothideomycetes                                                           | 0 | 0 | 0 | 0 |
| Ascomycot Sordariomycetes Xylariales Xylariaceae                                    | 0 | 0 | 0 | 0 |
| Ascomycot Dothideomycetes                                                           | 0 | 0 | 0 | 0 |
| Ascomycot Sordariomycetes Diaporthales Diaporthaceae Diaporthe                      | 0 | 0 | 0 | 0 |
| Ascomycot Dothideomycetes Capnodiales Teratosphaeriaceae                            | 0 | 0 | 0 | 0 |
| Ascomycot Dothideomycetes Pleosporales Didymellaceae                                | 0 | 0 | 0 | 0 |
| Ascomycot Sordariomycetes Xylariales Sporocadaceae Pestalotiopsis                   | 0 | 0 | 0 | 0 |
| Ascomycot Dothideomycetes Capnodiales Mycosphaeraceae Phaeophleospora               | 0 | 0 | 0 | 0 |
| Ascomycot Eurotiomycetes Chaetothyriales                                            | 0 | 0 | 0 | 0 |
| Ascomycot Archaeorhizomycetes                                                       | 0 | 0 | 0 | 0 |
| Ascomycot Saccharomycetes Saccharomycetes Dipodascaceae Dipodascus                  | 0 | 0 | 0 | 0 |
| Ascomycot Dothideomycetes Pleosporales Amorosiaceae Angustimassarina                | 0 | 0 | 0 | 0 |
| Ascomycot Leotiomycetes Thelebolales Pseudeurotiaceae Gymnostellatospora            | 0 | 0 | 0 | 0 |
| Ascomycot Dothideomycetes                                                           | 0 | 0 | 0 | 0 |
| Ascomycot Dothideomycetes Capnodiales Mycosphaerellaceae                            | 0 | 0 | 0 | 0 |
| Ascomycot Sordariomycetes Xylariales Xylariaceae Xylaria                            | 0 | 0 | 0 | 0 |
| Ascomycot Sordariomycetes Hypocreales                                               | 0 | 0 | 0 | 0 |
| Ascomycot Dothideomycetes Pleosporales Didymosporales Spegazzinia                   | 0 | 0 | 0 | 0 |
| Ascomycot Sordariomycetes                                                           | 0 | 0 | 0 | 0 |
| Ascomycot Sordariomycetes Xylariales                                                | 0 | 0 | 0 | 0 |
| Ascomycot Sordariomycetes Diaporthales                                              | 0 | 0 | 0 | 0 |
| Ascomycot Leotiomycetes                                                             | 0 | 0 | 0 | 0 |
| Ascomycot Sordariomycetes Sordariales                                               | 0 | 0 | 0 | 0 |
| Ascomycot Eurotiomycetes Eurotiales Trichocomycetes Talaromyces                     | 0 | 0 | 0 | 0 |
| Ascomycot Leotiomycetes Helotiales Helotiaceae Articulospora                        | 0 | 0 | 0 | 0 |
| Ascomycot Eurotiomycetes                                                            | 0 | 0 | 0 | 0 |
| Ascomycot Eurotiomycetes Eurotiales Aspergillaceae Penicillium                      | 0 | 0 | 0 | 0 |
| Ascomycot Sordariomycetes Diaporthales                                              | 0 | 0 | 0 | 0 |
| Ascomycot Dothideomycetes Capnodiales Cladosporiaceae Verrucocladosporium           | 0 | 0 | 0 | 0 |
| Ascomycot Leotiomycetes Helotiales                                                  | 0 | 0 | 0 | 0 |
| Ascomycot Sordariomycetes Hypocreales Hypocreaceae                                  | 0 | 0 | 0 | 0 |
| Ascomycot Sordariomycetes Boliniales Boliniales_fam_Incertae_sedis                  | 0 | 0 | 0 | 0 |
| Ascomycot Sordariomycetes Xylariales                                                | 0 | 0 | 0 | 0 |
| Ascomycot Sordariomycetes Xylariales Xylariaceae                                    | 0 | 0 | 0 | 0 |
| Ascomycot Sordariomycetes Calosphaeraceae Calosphaera Jattaia                       | 0 | 0 | 0 | 0 |
| Ascomycot Sordariomycetes Hypocreales                                               | 0 | 0 | 0 | 0 |
| Ascomycot Eurotiomycetes Chaetothyriales Cyphellophorales Cyphellophora fusarioides | 0 | 0 | 0 | 0 |
| Ascomycot Eurotiomycetes Eurotiales Aspergillaceae Penicillium                      | 0 | 0 | 0 | 0 |
| Ascomycot Saccharomycetes Saccharomycetes Trichomonas Blastobotrys                  | 0 | 0 | 0 | 0 |
| Ascomycot Dothideomycetes Asterinales Parmularia Parmularia                         | 0 | 0 | 0 | 0 |
| Ascomycot Sordariomycetes Xylariales Xylariaceae Anthostomella                      | 0 | 0 | 0 | 0 |
| Ascomycot Dothideomycetes Pleosporales Phaeosphaeriales Leptospora                  | 0 | 0 | 0 | 0 |
| Ascomycot Dothideomycetes Pleosporales                                              | 0 | 0 | 0 | 0 |
| Ascomycot Saccharomycetes Saccharomycetes Pichiaceae Pichia                         | 0 | 0 | 0 | 0 |

|                                                                     |     |     |     |    |
|---------------------------------------------------------------------|-----|-----|-----|----|
| Ascomycot Sordariom: Xylariales Xylariaceae Muscodor                | 0   | 0   | 0   | 0  |
| Ascomycot Sordariom: Hypocreale Nectriaceae Neocosmospora           | 0   | 0   | 0   | 0  |
| Ascomycot Sordariom: Hypocreale Nectriaceae Ilyonectria             | 0   | 0   | 0   | 0  |
| Ascomycot Dothideom: Capnodiale Mycosphaera Phaeophleospora         | 0   | 0   | 0   | 0  |
| Ascomycot Sordariom: Glomerella Plectosphaera Paragibbellulopsis    | 0   | 0   | 0   | 0  |
| Ascomycota                                                          | 0   | 0   | 0   | 0  |
| Ascomycot Dothideom: Capnodiale Mycosphaerellaceae                  | 0   | 0   | 0   | 0  |
| Ascomycot Sordariom: Xylariales Amphisphe Amphisphaeria             | 0   | 0   | 0   | 0  |
| Ascomycot Sordariom: Diaporthales                                   | 0   | 0   | 0   | 0  |
| Ascomycot Dothideom: Capnodiale Mycosphaerellaceae                  | 0   | 0   | 0   | 0  |
| Ascomycot Dothideom: Botryosphaera Phyllosticta Phyllosticta        | 0   | 0   | 0   | 0  |
| Ascomycot Saccharom Saccharom Debaryom: Debaryomyces                | 0   | 0   | 0   | 0  |
| Ascomycot Dothideom: Capnodiale Teratosphaeriaceae                  | 0   | 0   | 0   | 0  |
| Ascomycot Sordariom: Diaporthales                                   | 0   | 0   | 0   | 0  |
| Ascomycot Dothideom: Capnodiale Teratosphaera Devriesia             | 0   | 0   | 0   | 0  |
| Ascomycot Sordariom: Hypocreale Bionectriaceae                      | 0   | 0   | 0   | 0  |
| Ascomycot Eurotiomy: Onygenale Onygenace Auxarthron                 | 0   | 0   | 0   | 0  |
| Ascomycot Dothideom: Asterinales Parmularia Parmularia              | 0   | 0   | 0   | 0  |
| Ascomycota                                                          | 0   | 0   | 0   | 0  |
| Ascomycot Eurotiomy: Chaetothyria Cyphelloph Cyphellophora          | 0   | 0   | 0   | 0  |
| Ascomycot Eurotiomy: Chaetothyriales                                | 0   | 0   | 0   | 0  |
| Ascomycot Dothideom: Pleosporale Corynespora Corynespora            | 0   | 0   | 0   | 0  |
| Ascomycot Sordariomycetes                                           | 0   | 0   | 0   | 0  |
| Ascomycot Leotiomy: Helotiales Dermateace Pezicula                  | 0   | 0   | 0   | 0  |
| Ascomycot Sordariom: Hypocreale Stachybotryaceae                    | 0   | 0   | 0   | 0  |
| Ascomycot Dothideom: Venturiales                                    | 0   | 0   | 0   | 0  |
| Ascomycot Eurotiomy: Phaeomon Phaeomon Xenocylindrosporium          | 0   | 0   | 0   | 0  |
| Ascomycot Sordariom: Magnapora Magnaporthaceae                      | 0   | 0   | 0   | 0  |
| Ascomycot Dothideom: Botryosphaera Botryosphaera Diplodia           | 0   | 0   | 0   | 0  |
| Ascomycota                                                          | 0   | 0   | 0   | 0  |
| Ascomycot Sordariom: Hypocreale Nectriaceae Phialoseptomonium       | 0   | 0   | 0   | 0  |
| Ascomycot Dothideom: Pleosporale Didymosphaeriaceae                 | 0   | 0   | 0   | 0  |
| Ascomycot Dothideom: Pleosporale Didymella Similiphoma              | 0   | 0   | 0   | 0  |
| Ascomycot Dothideom: Pleosporale Didymosphaeriaceae                 | 0   | 0   | 0   | 0  |
| Basidiomy: Tremellom Tremellale: Bulleribasii Vishniacozyma         | 26  | 32  | 6   | 38 |
| Basidiomy: Tremellom Tremellale: Bulleraceae Fonsecazyma            | 0   | 195 | 96  | 31 |
| Basidiomy: Tremellom Tremellales                                    | 0   | 0   | 0   | 0  |
| Basidiomy: Tremellom Tremellale: Rhynchoga Papiliotrema             | 0   | 0   | 0   | 11 |
| Basidiomycota                                                       | 0   | 0   | 11  | 11 |
| Basidiomy: Malassezia Malassezia Malassezia Malassezia              | 0   | 0   | 0   | 0  |
| Basidiomy: Tremellom Tremellale: Bulleribasii Vishniacozyma         | 0   | 0   | 0   | 0  |
| Basidiomy: Tremellom Tremellale: Rhynchoga Papiliotrematris         | 0   | 0   | 0   | 9  |
| Basidiomy: Tremellom Cystofiloba Mrakiaceae Tausonia                | 277 | 244 | 158 | 0  |
| Basidiomy: Microbotry Microbotry Chrysozym Sampaiozyma              | 50  | 0   | 0   | 0  |
| Basidiomy: Tremellom Tremellale: Tremellale Kwoniella               | 0   | 0   | 0   | 0  |
| Basidiomy: Agaricomycete Thelephora Thelephoraceae                  | 32  | 36  | 6   | 0  |
| Basidiomy: Agaricomycete Russulales Russulaceae Russula pectinatoic | 0   | 14  | 0   | 0  |
| Basidiomy: Tremellom Tremellale: Bulleribasii Hannaella             | 0   | 0   | 0   | 2  |
| Basidiomy: Tremellom Tremellale: Bulleribasii Vishniacozyma         | 0   | 0   | 0   | 0  |
| Basidiomy: Tremellom Tremellale: Trimorphomycetaceae                | 0   | 0   | 0   | 0  |

|                                                               |     |     |    |    |
|---------------------------------------------------------------|-----|-----|----|----|
| Basidiomyc Agaricomyc Cantharell; Ceratobasi Waitea           | 0   | 0   | 0  | 0  |
| Basidiomyc Tremellom Tremellale Trimorpho Saitozyma           | 166 | 38  | 26 | 16 |
| Basidiomyc Tremellom Tremellale Trimorpho Saitozyma           | 0   | 0   | 0  | 11 |
| Basidiomyc Wallemion Wallemiale Wallemiac Wallemia            | 47  | 0   | 35 | 14 |
| Basidiomyc Ustilaginor Ustilaginal Ustilaginac Moesziomyces   | 0   | 0   | 0  | 0  |
| Basidiomyc Malasseziac Malassezia Malassezia Malassezia       | 0   | 0   | 0  | 0  |
| Basidiomyc Microbotry Sporidiobo Sporidiobo Rhodotorula       | 0   | 0   | 0  | 0  |
| Basidiomyc Tremellom Filobasidia Piskurozyn Solicoccozyma     | 99  | 112 | 63 | 0  |
| Basidiomyc Tremellom Filobasidia Filobasidia Filobasidium     | 49  | 22  | 18 | 3  |
| Basidiomyc Tremellom Filobasidia Filobasidia Filobasidium     | 0   | 0   | 0  | 5  |
| Basidiomyc Malasseziac Malassezia Malassezia Malassezia       | 0   | 0   | 0  | 0  |
| Basidiomyc Agaricomyc Cantharell; Ceratobasi Waitea           | 0   | 0   | 0  | 0  |
| Basidiomyc Agaricomyc Agaricales Tricholom; Clitocybula       | 0   | 0   | 0  | 0  |
| Basidiomyc Tremellom Tremellale Rhynchoga Papiliotrema        | 0   | 0   | 0  | 0  |
| Basidiomyc Tremellom Tremellale Bulleribasi Vishniacozyma     | 0   | 0   | 0  | 0  |
| Basidiomyc Agaricomyc Corticiales Punctulari; Punctulariopsis | 0   | 154 | 0  | 0  |
| Basidiomyc Tremellom Tremellale Bulleribasi Vishniacozyma     | 0   | 0   | 0  | 0  |
| Basidiomyc Tremellom Tremellale Bulleribasi Hannaella         | 0   | 0   | 0  | 0  |
| Basidiomyc Agaricomyc Cantharell; Ceratobasi Waitea           | 0   | 0   | 0  | 0  |
| Basidiomyc Tremellom Tremellale Bulleribasi Hannaella         | 19  | 3   | 0  | 0  |
| Basidiomyc Agaricomyc Polyporale Polyporace Funalia           | 0   | 0   | 0  | 0  |
| Basidiomyc Agaricomyc Auricularia Exidiaceae                  | 17  | 0   | 0  | 0  |
| Basidiomyc Tremellom Tremellale Bulleribasi Hannaella         | 0   | 0   | 0  | 0  |
| Basidiomyc Tremellom Tremellale Bulleribasi Vishniacozyma     | 0   | 0   | 0  | 0  |
| Basidiomyc Tremellom Tremellale Rhynchoga Papiliotrema        | 0   | 0   | 0  | 0  |
| Basidiomyc Tremellom Tremellale Bulleribasi Vishniacozyma     | 0   | 0   | 0  | 0  |
| Basidiomyc Tremellom Filobasidia Filobasidia Filobasidium     | 0   | 0   | 0  | 0  |
| Basidiomyc Malasseziac Malassezia Malassezia Malassezia       | 0   | 0   | 0  | 0  |
| Basidiomyc Tremellom Tremellale Bulleribasi Vishniacozyma     | 0   | 0   | 0  | 0  |
| Basidiomyc Agaricomyc Polyporale Polyporace Favolus           | 0   | 0   | 0  | 0  |
| Basidiomyc Tremellom Tremellale Bulleribasi Hannaella         | 0   | 0   | 0  | 0  |
| Basidiomyc Agaricomyc Polyporales                             | 0   | 0   | 0  | 0  |
| Basidiomyc Agaricomycetes                                     | 0   | 66  | 0  | 0  |
| Basidiomyc Microbotry Sporidiobo Sporidiobo Rhodotorula       | 8   | 40  | 0  | 0  |
| Basidiomyc Tremellom Tremellale Tremellale Kwoniella          | 0   | 0   | 0  | 0  |
| Basidiomyc Tremellom Tremellales                              | 30  | 0   | 27 | 0  |
| Basidiomyc Tremellom Holterman Holterman Holtermanniella      | 0   | 0   | 0  | 0  |
| Basidiomyc Tremellom Tremellale Bulleribasi Vishniacoz' sp    | 0   | 0   | 0  | 0  |
| Basidiomyc Malasseziac Malassezia Malassezia Malassezia       | 0   | 0   | 0  | 0  |
| Basidiomyc Tremellom Tremellale Tremellace Tremella           | 0   | 0   | 0  | 0  |
| Basidiomyc Tremellom Tremellale Trimorpho Saitozyma           | 0   | 0   | 0  | 0  |
| Basidiomyc Pucciniomyc Septobasid Septobasic Auriculoscypa    | 41  | 0   | 0  | 0  |
| Basidiomyc Tremellom Tremellale Bulleribasi Vishniacozyma     | 0   | 0   | 0  | 0  |
| Basidiomyc Tremellom Tremellale Bulleribasi Hannaella         | 0   | 0   | 0  | 0  |
| Basidiomyc Tremellom Tremellale Bulleribasi Vishniacozyma     | 0   | 0   | 0  | 0  |
| Basidiomyc Tremellom Tremellale Bulleribasi Vishniacozyma     | 0   | 0   | 0  | 0  |
| Basidiomyc Agaricomyc Polyporale Meruliace; Phlebia           | 0   | 0   | 0  | 44 |
| Basidiomyc Tremellom Tremellale Tremellale Kwoniella          | 0   | 0   | 0  | 0  |
| Basidiomyc Pucciniomyc Septobasid Septobasic Septobasidium    | 26  | 0   | 15 | 0  |
| Basidiomyc Agaricomyc Thelephor; Thelephoraceae               | 0   | 0   | 0  | 0  |

|                                                                             |    |    |    |   |
|-----------------------------------------------------------------------------|----|----|----|---|
| Basidiomyc: Malasseziaceae Malassezia Malasseziaceae                        | 0  | 0  | 0  | 0 |
| Basidiomyc: Tremellom Tremellaceae: Bulleribasii Vishniacozyma              | 0  | 0  | 0  | 0 |
| Basidiomyc: Tremellom Tremellaceae: Bulleribasii Vishniacozyma              | 0  | 0  | 0  | 0 |
| Basidiomyc: Tremellom Tremellaceae: Bulleribasii Hannaella                  | 0  | 0  | 0  | 0 |
| Basidiomyc: Microbotry Sporidiobolus Sporidiobolus Sporobolomyces           | 0  | 0  | 0  | 0 |
| Basidiomyc: Tremellom Tremellaceae: Bulleribasii Vishniacozyma              | 0  | 0  | 0  | 0 |
| Basidiomyc: Agaricomyc Russulales Russulaceae Russula                       | 0  | 0  | 0  | 0 |
| Basidiomyc: Tremellom Tremellaceae: Bulleribasii Vishniacozyma              | 0  | 0  | 0  | 0 |
| Basidiomyc: Agaricomyc Trechisporales Hydnodontales Trechispora             | 0  | 0  | 0  | 0 |
| Basidiomyc: Tremellom Tremellaceae: Bulleribasii Vishniacozyma              | 0  | 0  | 0  | 0 |
| Basidiomyc: Tremellom Tremellaceae: Bulleribasii Hannaella                  | 0  | 0  | 0  | 0 |
| Basidiomyc: Tremellom Tremellaceae: Tremellace Cryptococcus                 | 0  | 0  | 0  | 0 |
| Basidiomyc: Tremellom Tremellaceae: Bulleribasii Vishniacozyma              | 0  | 0  | 0  | 0 |
| Basidiomyc: Malasseziaceae Malassezia Malassezia Malassezia                 | 0  | 0  | 0  | 0 |
| Basidiomyc: Tremellom Tremellaceae: Rhynchogaster Papillotrema              | 0  | 0  | 0  | 0 |
| Basidiomyc: Tremellom Tremellaceae: Tremellace Bulleromyces                 | 0  | 0  | 3  | 0 |
| Basidiomyc: Tremellom Tremellaceae: Tremellace Kwoniella                    | 0  | 0  | 0  | 0 |
| Basidiomyc: Cystobasidium Erythrobasium Erythrobasium Erythrobasidium       | 0  | 11 | 19 | 0 |
| Basidiomyc: Malasseziaceae Malassezia Malassezia Malassezia                 | 0  | 0  | 0  | 0 |
| Basidiomyc: Tremellom Tremellaceae: Bulleribasii Vishniacozyma              | 0  | 0  | 0  | 0 |
| Basidiomyc: Tremellom Cystofilobasidium Cystofilobasidium Cystofilobasidium | 0  | 0  | 0  | 0 |
| Basidiomyc: Agaricomyc Sebaciniales Sebacinaceae Sebacinia                  | 24 | 5  | 0  | 0 |
| Basidiomyc: Pucciniomyc Septobasidium Septobasidium Septobasidium           | 0  | 0  | 29 | 0 |
| Basidiomyc: Malasseziaceae Malassezia Malassezia Malassezia                 | 0  | 0  | 0  | 0 |
| Basidiomyc: Tremellom Tremellaceae: Bulleribasii Vishniacozyma              | 0  | 0  | 0  | 0 |
| Basidiomyc: Agaricomyc Polyporales Meruliaceae Mycoacia                     | 0  | 0  | 0  | 0 |
| Basidiomyc: Microbotry Microbotry Chrysozyma Sampaiozyma                    | 0  | 0  | 0  | 2 |
| Basidiomyc: Agaricomyc Auriculariales                                       | 0  | 0  | 0  | 0 |
| Basidiomyc: Tremellom Tremellaceae: Tremellace Kwoniella                    | 0  | 0  | 0  | 0 |
| Basidiomyc: Agaricomyc Agaricales Agaricaceae Lepiota                       | 0  | 27 | 0  | 0 |
| Basidiomyc: Malasseziaceae Malassezia Malassezia Malassezia                 | 0  | 0  | 0  | 0 |
| Basidiomyc: Tremellom Tremellaceae: Bulleribasii Vishniacozyma              | 0  | 0  | 0  | 0 |
| Basidiomyc: Tremellom Tremellaceae: Bulleribasii Vishniacozyma              | 0  | 0  | 0  | 0 |
| Basidiomyc: Tremellom Tremellaceae: Bulleribasii Vishniacozyma              | 0  | 0  | 0  | 0 |
| Basidiomyc: Tremellom Tremellaceae: Bulleribasii Vishniacozyma              | 0  | 0  | 0  | 0 |
| Basidiomyc: Microbotry Sporidiobolus Sporidiobolus Sporobolomyces           | 0  | 0  | 0  | 0 |
| Basidiomyc: Agaricomyc Russulales Peniophora: Peniophora                    | 25 | 0  | 0  | 0 |
| Basidiomyc: Tremellom Tremellaceae: Rhynchogaster Papillotrema              | 3  | 8  | 0  | 0 |
| Basidiomyc: Tremellom Tremellaceae: Tremellace Bulleromyces                 | 0  | 3  | 0  | 0 |
| Basidiomyc: Agaricomyc Agaricales Psathyrella Coprinopsis                   | 24 | 0  | 0  | 0 |
| Basidiomyc: Tremellom Tremellaceae: Tremellace Cryptococcus                 | 16 | 8  | 0  | 0 |
| Basidiomyc: Pucciniomyc Septobasidium Septobasidium Septobasidium           | 0  | 0  | 24 | 0 |
| Basidiomyc: Malasseziaceae Malassezia Malassezia Malassezia                 | 0  | 0  | 0  | 0 |
| Basidiomyc: Cystobasidium Cystobasidium Symmetrospora                       | 0  | 0  | 0  | 0 |
| Basidiomyc: Tremellom Tremellaceae: Bulleribasii Vishniacozyma              | 0  | 0  | 0  | 0 |
| Basidiomyc: Agaricomyc Cantharellales Ceratobasidium Ceratobasidium         | 0  | 0  | 0  | 0 |
| Basidiomyc: Tremellom Tremellaceae: Bulleribasii Vishniacozyma              | 0  | 0  | 0  | 0 |
| Basidiomyc: Microbotry Sporidiobolus Sporidiobolus Sporobolomyces           | 0  | 0  | 0  | 0 |
| Basidiomyc: Tremellom Tremellaceae: Bulleribasii Hannaella                  | 0  | 0  | 0  | 0 |
| Basidiomyc: Agaricomyc Boletales Gyrosporaceae Gyrosporus                   | 22 | 0  | 0  | 0 |

|                                                                    |    |    |    |    |
|--------------------------------------------------------------------|----|----|----|----|
| Basidiomyc: Tremellom Tremellale: Trimorpho Saitozyma              | 0  | 22 | 0  | 0  |
| Basidiomyc: Microbotry Sporidiobo Sporidiobo Sporobolomyces        | 0  | 22 | 0  | 0  |
| Basidiomyc: Classiculon Classiculale: Classiculac Classicula       | 0  | 0  | 21 | 0  |
| Basidiomyc: Tremellom Tremellale: Cuniculitre Kockovaella          | 0  | 0  | 0  | 0  |
| Basidiomyc: Agaricomyc Agaricales: Schizophyl Schizophyllum        | 20 | 0  | 0  | 0  |
| Basidiomyc: Tremellom Tremellale: Bulleribasii Vishniacozyma       | 0  | 0  | 0  | 0  |
| Basidiomyc: Agaricomyc Russulales: Russulaceae Russula             | 0  | 0  | 0  | 0  |
| Basidiomyc: Tremellom Tremellales                                  | 19 | 0  | 0  | 0  |
| Basidiomyc: Agaricomyc Agaricales: Typhulaceae Typhula             | 15 | 4  | 0  | 0  |
| Basidiomyc: Agaricomyc Russulales: Peniophoraceae                  | 0  | 19 | 0  | 0  |
| Basidiomyc: Tremellom Tremellale: Bulleribasii Dioszegia           | 0  | 0  | 0  | 0  |
| Basidiomyc: Agaricomyc Thelephorae Thelephoraceae                  | 0  | 0  | 0  | 0  |
| Basidiomyc: Agaricomyc Agaricales: Psathyrella Coprinellus         | 0  | 0  | 0  | 0  |
| Basidiomyc: Agaricomyc Cantharellae Ceratobasi Thanatephorus       | 0  | 0  | 0  | 0  |
| Basidiomyc: Agaricomyc Boletales: Gyrosporae Gyrosporus            | 0  | 0  | 0  | 0  |
| Basidiomyc: Tremellom Trichospor Trichospor Apiotrichum            | 17 | 0  | 0  | 0  |
| Basidiomyc: Microbotry Microbotry Chrysozym Sampaiozym             | 0  | 17 | 0  | 0  |
| Basidiomyc: Agaricomycetes                                         | 0  | 0  | 0  | 0  |
| Basidiomyc: Agaricomyc Boletales: Gyrosporae Gyrosporus            | 0  | 0  | 0  | 0  |
| Basidiomyc: Tremellom Tremellale: Trimorpho Saitozyma              | 0  | 0  | 0  | 0  |
| Basidiomyc: Tremellom Tremellale: Bulleribasii Vishniacozyma       | 0  | 0  | 0  | 0  |
| Basidiomyc: Tremellom Tremellale: Bulleribasii Vishniacozyma       | 0  | 0  | 0  | 0  |
| Basidiomyc: Microbotry Sporidiobo Sporidiobo Rhodotorula           | 0  | 0  | 0  | 0  |
| Basidiomyc: Tremellomycetes                                        | 0  | 0  | 0  | 0  |
| Basidiomyc: Agaricomyc Polyporales: Steccherin: Nigrosporus        | 0  | 0  | 0  | 0  |
| Basidiomyc: Tremellom Tremellale: Tremellace Bulleromyces          | 0  | 0  | 0  | 0  |
| Basidiomyc: Agaricomyc Cantharellae Ceratobasi Waitea              | 0  | 0  | 0  | 0  |
| Basidiomyc: Agaricomyc Hymenochaetales: Hymenochaetae Hymenochaete | 0  | 0  | 0  | 0  |
| Basidiomyc: Tremellom Tremellale: Cuniculitre Fellomyces           | 0  | 0  | 0  | 0  |
| Basidiomyc: Agaricomyc Thelephorae Thelephoraceae                  | 0  | 0  | 0  | 0  |
| Basidiomyc: Wallemion Wallemiales: Wallemiaceae Wallemia           | 0  | 15 | 0  | 0  |
| Basidiomyc: Tremellom Tremellale: Bulleribasii Vishniacozyma       | 0  | 0  | 0  | 0  |
| Basidiomyc: Agaricomyc Polyporales: Meruliaceae Phlebia            | 0  | 0  | 0  | 0  |
| Basidiomyc: Agaricomyc Thelephorae Thelephoraceae                  | 0  | 0  | 0  | 0  |
| Basidiomyc: Tremellom Tremellale: Bulleribasii Vishniacozyma       | 0  | 0  | 0  | 0  |
| Basidiomyc: Agaricomyc Polyporales: Polyporaceae Trametes          | 13 | 0  | 0  | 0  |
| Basidiomyc: Tremellom Tremellale: Trimorpho Saitozyma              | 2  | 0  | 0  | 0  |
| Basidiomyc: Agaricomyc Corticiales: Punctulariae Punctulariopsis   | 0  | 0  | 6  | 0  |
| Basidiomyc: Exobasidio Golubeviae Golubeviae Golubevia             | 0  | 0  | 0  | 0  |
| Basidiomyc: Agaricomyc Agaricales: Schizophyl Schizophyllum        | 0  | 0  | 0  | 0  |
| Basidiomyc: Microbotry Sporidiobo Sporidiobo Rhodotorula           | 0  | 0  | 0  | 0  |
| Basidiomyc: Cystobasid Cystobasid Symmetro: Symmetrospora          | 0  | 0  | 0  | 0  |
| Basidiomyc: Tremellom Trichospor Trichospor Apiotrichum            | 0  | 0  | 0  | 0  |
| Basidiomyc: Tremellom Tremellale: Bulleribasii Dioszegia sp        | 0  | 0  | 0  | 0  |
| Basidiomyc: Agaricomyc Agaricales: Psathyrella Coprinellus         | 0  | 0  | 0  | 0  |
| Basidiomyc: Agaricomyc Sebaciniales: Serendipitae Serendipita      | 0  | 0  | 0  | 0  |
| Basidiomyc: Agaricomyc Agaricales: Agaricaceae Agaricus            | 0  | 0  | 0  | 0  |
| Basidiomyc: Tremellom Tremellale: Bulleraceae Fonsecazyma          | 0  | 0  | 0  | 0  |
| Basidiomyc: Agaricomyc Cantharellae Ceratobasi Ceratobasidium      | 0  | 0  | 0  | 12 |
| Basidiomyc: Cystobasid Cystobasid Symmetro: Symmetrospora          | 0  | 0  | 0  | 0  |

|                                                                                     |    |    |   |   |
|-------------------------------------------------------------------------------------|----|----|---|---|
| Basidiomycota Ustilaginorales Ustilaginales Ustilaginaceae Moesziomyces antarcticus | 0  | 0  | 0 | 0 |
| Basidiomycota Tremellomycetes Cystofilobasidium Cystofilobasidium Cystofilobasidium | 0  | 0  | 0 | 0 |
| Basidiomycota Agaricomycetes Sebacinales                                            | 11 | 0  | 0 | 0 |
| Basidiomycota Agaricomycetes Agaricales Inocybaceae                                 | 11 | 0  | 0 | 0 |
| Basidiomycota Agaricomycetes Agaricales Entolomata: Clitopilus                      | 0  | 11 | 0 | 0 |
| Basidiomycota Agaricomycetes Polyporales Fomitopsidaceae Cinereomyces               | 0  | 0  | 0 | 0 |
| Basidiomycota Agaricomycetes Hymenochaetales Rickenellaceae Sidera                  | 0  | 0  | 0 | 0 |
| Basidiomycota Agaricomycetes Polyporales Phanerochaetales Bjerkandera               | 0  | 0  | 0 | 0 |
| Basidiomycota Tremellomycetes Filobasidia Filobasidia Filobasidium                  | 0  | 0  | 0 | 0 |
| Basidiomycota Tremellomycetes Tremellales                                           | 0  | 0  | 0 | 0 |
| Basidiomycota Agaricomycetes Trechisporales                                         | 0  | 0  | 0 | 0 |
| Basidiomycota Tremellomycetes Tremellales: Bulleribasidium Hannaella                | 0  | 0  | 0 | 0 |
| Basidiomycota Agaricomycetes Sebacinales Sebacinaceae Sebacina                      | 0  | 10 | 0 | 0 |
| Basidiomycota Agaricomycetes Russulales Russulaceae Russula                         | 0  | 0  | 0 | 0 |
| Basidiomycota Agaricomycetes Agaricales                                             | 0  | 0  | 0 | 0 |
| Basidiomycota Cystobasidium Cystobasidium Cystobasidium Occultifur                  | 0  | 0  | 0 | 0 |
| Basidiomycota Exobasidium Golubevia Golubevia Golubevia                             | 0  | 0  | 0 | 0 |
| Basidiomycota Cystobasidium Erythrobasium Erythrobasium Bannoa                      | 0  | 0  | 0 | 0 |
| Basidiomycota Agaricomycetes Polyporales Meruliaceae Phlebia                        | 0  | 0  | 0 | 0 |
| Basidiomycota Tremellomycetes Trichosporales Trichosporales Apiotrichum             | 0  | 0  | 0 | 9 |
| Basidiomycota Tremellomycetes Tremellales: Bulleribasidium Vishniacozyma            | 0  | 0  | 0 | 9 |
| Basidiomycota                                                                       | 0  | 0  | 0 | 0 |
| Basidiomycota Agaricomycetes Cantharellales Ceratobasidiaceae                       | 0  | 0  | 0 | 0 |
| Basidiomycota Tremellomycetes Tremellales: Bulleribasidium Vishniacozyma            | 0  | 0  | 0 | 0 |
| Basidiomycota Malasseziaceae Malassezia Malassezia Malassezia                       | 0  | 0  | 0 | 0 |
| Basidiomycota Agaricomycetes Thelephorales Thelephoraceae                           | 0  | 0  | 0 | 0 |
| Basidiomycota Tremellomycetes Tremellales: Rhynchogaster Papillotrema               | 0  | 0  | 0 | 0 |
| Basidiomycota                                                                       | 0  | 0  | 0 | 0 |
| Basidiomycota Cystobasidium Erythrobasium Erythrobasium Bannoa                      | 0  | 0  | 8 | 0 |
| Basidiomycota Agaricomycetes Sebacinales Serendipitaceae Serendipita                | 0  | 0  | 0 | 0 |
| Basidiomycota Agaricomycetes Sebacinales Serendipitaceae                            | 0  | 0  | 0 | 0 |
| Basidiomycota Agaricomycetes Polyporales Fomitopsidaceae Postia                     | 0  | 0  | 0 | 0 |
| Basidiomycota Agaricomycetes Agaricales                                             | 0  | 0  | 0 | 0 |
| Basidiomycota Cystobasidium Cystobasidium Symmetrorhynchus Symmetrorhynchus         | 0  | 0  | 0 | 0 |
| Basidiomycota Cystobasidium Erythrobasium Erythrobasium Erythrobasidium             | 0  | 0  | 0 | 0 |
| Basidiomycota Agaricomycetes Polyporales Fomitopsidaceae Cinereomyces               | 7  | 0  | 0 | 0 |
| Basidiomycota Agaricomycetes Agaricales Schizophyllum Schizophyllum                 | 0  | 7  | 0 | 0 |
| Basidiomycota Agaricomycetes Agaricales Tricholomata: Gerronema                     | 0  | 7  | 0 | 0 |
| Basidiomycota Pucciniomycetes Septobasidium Septobasidium Septobasidium             | 0  | 7  | 0 | 0 |
| Basidiomycota Agaricomycetes Cantharellales Ceratobasidium Thanatephorus            | 0  | 0  | 7 | 0 |
| Basidiomycota Tremellomycetes Tremellales: Bulleribasidium Vishniacozyma            | 0  | 0  | 0 | 0 |
| Basidiomycota Agaricomycetes Agaricales Entolomata: Clitopilus                      | 0  | 0  | 0 | 0 |
| Basidiomycota Agaricomycetes Agaricales Agaricaceae Agaricus                        | 0  | 0  | 0 | 0 |
| Basidiomycota Agaricomycetes Agaricales                                             | 0  | 0  | 0 | 0 |
| Basidiomycota Tremellomycetes Tremellales: Bulleribasidium Vishniacozyma            | 6  | 0  | 0 | 0 |
| Basidiomycota Agaricomycetes                                                        | 6  | 0  | 0 | 0 |
| Basidiomycota Agaricomycetes Agaricales Agaricaceae Agaricus                        | 6  | 0  | 0 | 0 |
| Basidiomycota Agaricomycetes Agaricales                                             | 6  | 0  | 0 | 0 |
| Basidiomycota Agaricomycetes                                                        | 6  | 0  | 0 | 0 |
| Basidiomycota Agaricomycetes Agaricales Agaricaceae Agaricus                        | 0  | 3  | 0 | 0 |



|                                                                             |   |   |   |   |
|-----------------------------------------------------------------------------|---|---|---|---|
| Basidiomyc Agaricomycetes                                                   | 0 | 0 | 6 | 0 |
| Basidiomyc Agaricomyc Agaricales Bolbitiaceae Conocybe                      | 0 | 0 | 6 | 0 |
| Basidiomyc Agaricostill Agaricostill Ruineniace Ruinenia                    | 0 | 0 | 6 | 0 |
| Basidiomyc Tremellom Trichospor Trichospor Apiotrichum                      | 0 | 0 | 6 | 0 |
| Basidiomyc Agaricomyc Cantharellales                                        | 0 | 0 | 0 | 0 |
| Basidiomyc Agaricomyc Agaricales Psathyrella Coprinellus                    | 0 | 0 | 0 | 0 |
| Basidiomyc Agaricomyc Agaricales Clavariaceae Clavulinopsis                 | 0 | 0 | 0 | 0 |
| Basidiomyc Malasseziaceae Malassezia Malassezia Malassezia                  | 0 | 0 | 0 | 0 |
| Basidiomyc Malasseziaceae Malassezia Malassezia Malassezia                  | 0 | 0 | 0 | 0 |
| Basidiomyc Agaricomyc Agaricales Psathyrella Coprinellus                    | 0 | 0 | 0 | 0 |
| Basidiomyc Agaricomycetes                                                   | 0 | 0 | 0 | 0 |
| Basidiomyc Agaricomyc Corticiales Punctulariaceae Punctulariopsis           | 0 | 0 | 0 | 0 |
| Basidiomyc Agaricomyc Cantharellales Ceratobasidium Ceratobasidium          | 5 | 0 | 0 | 0 |
| Basidiomyc Agaricomyc Polyporales Steccherinaceae Nigroporus                | 5 | 0 | 0 | 0 |
| Basidiomyc Agaricostill Agaricostill Chionospora Kurtzmanomyces             | 5 | 0 | 0 | 0 |
| Basidiomyc Pucciniomycetes Septobasidium Septobasidium Septobasidium        | 0 | 5 | 0 | 0 |
| Basidiomyc Microbotrydia Sporidiobolus Sporidiobolus Rhodotorula            | 0 | 0 | 0 | 0 |
| Basidiomyc Agaricomyc Sebacinaceae Sebacinaceae Sebacinaceae                | 0 | 0 | 0 | 0 |
| Basidiomyc Agaricomyc Agaricales                                            | 0 | 0 | 0 | 0 |
| Basidiomyc Agaricomyc Polyporales                                           | 0 | 0 | 0 | 0 |
| Basidiomyc Agaricomyc Russulales Russulaceae Russula                        | 0 | 0 | 0 | 0 |
| Basidiomyc Microbotrydia Sporidiobolus Sporidiobolus Rhodotorula            | 0 | 0 | 0 | 0 |
| Basidiomyc Agaricomyc Russulales Russulaceae Russula                        | 0 | 0 | 0 | 0 |
| Basidiomyc Malasseziaceae Malassezia Malassezia Malassezia                  | 0 | 0 | 0 | 0 |
| Basidiomyc Cystobasidium Cystobasidium Microsporomycetaceae                 | 0 | 0 | 0 | 0 |
| Basidiomyc Agaricomyc Polyporales Steccherinaceae Steccherinum              | 0 | 0 | 0 | 0 |
| Basidiomyc Microbotrydia Sporidiobolus Sporidiobolus Rhodospiridiobolus     | 0 | 0 | 0 | 0 |
| Basidiomyc Tremellom Tremellales Tremellales Kwoniella                      | 0 | 0 | 0 | 0 |
| Basidiomyc Tremellom Tremellales Tremellales Kwoniella                      | 0 | 0 | 0 | 0 |
| Basidiomyc Agaricomycetes                                                   | 4 | 0 | 0 | 0 |
| Basidiomyc Tremellom Tremellales Bulleribasidium Hannaella                  | 0 | 4 | 0 | 0 |
| Basidiomyc Agaricomyc Corticiales                                           | 0 | 4 | 0 | 0 |
| Basidiomyc Agaricomyc Auricularia Exidiaceae                                | 0 | 4 | 0 | 0 |
| Basidiomyc Agaricomycetes                                                   | 0 | 4 | 0 | 0 |
| Basidiomyc Agaricomyc Agaricales Lyophyllaceae Fibulochlar chilensis        | 0 | 4 | 0 | 0 |
| Basidiomyc Tremellom Tremellales Bulleribasidium Vishniacozyma              | 0 | 4 | 0 | 0 |
| Basidiomyc Agaricomyc Russulales                                            | 0 | 0 | 4 | 0 |
| Basidiomyc Tremellom Tremellales Tremellales Kwoniella                      | 0 | 0 | 0 | 4 |
| Basidiomyc Agaricomyc Polyporales Podoscypha Hypochnicium                   | 0 | 0 | 0 | 0 |
| Basidiomyc Tremellom Tremellales Bulleraceae Fonsecazyma                    | 0 | 0 | 0 | 0 |
| Basidiomyc Agaricomycetes                                                   | 0 | 0 | 0 | 0 |
| Basidiomyc Microbotrydia Microbotrydia Chrysozym Udeniomyces                | 0 | 0 | 0 | 0 |
| Basidiomyc Tremellom Tremellales Bulleribasidium Bulleribasidium oberjocher | 0 | 0 | 0 | 0 |
| Basidiomyc Atractiella Atractiella Hoehnelia Atractiella                    | 0 | 0 | 0 | 0 |
| Basidiomyc Ustilaginor Ustilaginaceae Ustilaginaceae Macalpinomyces         | 0 | 0 | 0 | 0 |
| Basidiomyc Agaricomyc Agaricales Entolomata Entoloma                        | 0 | 0 | 0 | 0 |
| Basidiomyc Ustilaginor Ustilaginaceae Ustilaginaceae Macalpinomyces         | 0 | 0 | 0 | 0 |
| Basidiomyc Tremellom Tremellales                                            | 0 | 0 | 0 | 0 |
| Basidiomyc Tremellom Tremellales Bulleribasidium Dioszegia                  | 0 | 0 | 0 | 0 |
| Basidiomyc Cystobasidium Cystobasidium Symmetro Symmetrospora               | 0 | 0 | 0 | 0 |

|                                                                      |   |   |   |   |
|----------------------------------------------------------------------|---|---|---|---|
| Basidiomyc Tremellom Tremellale: Bulleribasii Vishniacozyma          | 0 | 0 | 0 | 0 |
| Basidiomyc Tremellom Trichospor Trichospor Cutaneotrichosporon       | 0 | 0 | 0 | 0 |
| Basidiomyc Microbotry Sporidiobo Sporidiobo Rhodosporidiobolus       | 0 | 0 | 0 | 0 |
| Basidiomyc Agaricomyc Thelephora Thelephoraceae                      | 0 | 0 | 0 | 0 |
| Basidiomyc Agaricomyc Agaricales Stropharia Kuehneromyces            | 0 | 0 | 0 | 0 |
| Basidiomyc Agaricomyc Agaricales Agaricales_ Uncobasidium            | 3 | 0 | 0 | 0 |
| Basidiomyc Tremellom Filobasidia Piskurozyn Solicoccozyma            | 3 | 0 | 0 | 0 |
| Basidiomyc Agaricomyc Agaricales Stephanosporaceae                   | 3 | 0 | 0 | 0 |
| Basidiomyc Agaricomyc Agaricales Clavariaceae Clavaria               | 3 | 0 | 0 | 0 |
| Basidiomyc Agaricostill Agaricostill Kondoaceae Kondoia              | 3 | 0 | 0 | 0 |
| Basidiomyc Agaricomyc Cantharellae Ceratobasium Thanatephorus        | 3 | 0 | 0 | 0 |
| Basidiomyc Agaricomyc Agaricales Schizophyllum Schizophyllum         | 3 | 0 | 0 | 0 |
| Basidiomyc Agaricomyc Polyporales Fomitopsis Skeletocutis            | 3 | 0 | 0 | 0 |
| Basidiomyc Agaricomyc Agaricales Bolbitiaceae Panaeolus              | 0 | 3 | 0 | 0 |
| Basidiomyc Agaricomyc Agaricales Psathyrella Coprinellus             | 0 | 3 | 0 | 0 |
| Basidiomyc Agaricomyc Agaricales Clavariaceae Clavaria               | 0 | 3 | 0 | 0 |
| Basidiomyc Agaricomyc Agaricales Tricholoma Tricholoma               | 0 | 0 | 0 | 0 |
| Basidiomyc Agaricomycetes                                            | 0 | 0 | 0 | 0 |
| Basidiomyc Tremellom Filobasidia Filobasidia Goffeauzyma             | 0 | 0 | 0 | 0 |
| Basidiomyc Tremellom Trichospor Trichospor Trichosporon              | 0 | 0 | 0 | 0 |
| Basidiomyc Exobasidium Entylomata Entylomata Tilletiopsis            | 0 | 0 | 0 | 0 |
| Basidiomyc Ustilaginomycetes Ustilaginaceae Moesziomyces             | 0 | 0 | 0 | 0 |
| Basidiomyc Agaricomyc Agaricales Cortinariaceae Cortinarius          | 0 | 0 | 0 | 0 |
| Basidiomyc Tremellomycetes                                           | 0 | 0 | 0 | 0 |
| Basidiomyc Agaricomyc Cantharellae Clavulinaceae                     | 0 | 0 | 0 | 0 |
| Basidiomyc Agaricomyc Agaricales Psathyrella Coprinellus             | 0 | 0 | 0 | 0 |
| Basidiomyc Agaricomyc Agaricales                                     | 0 | 0 | 0 | 0 |
| Basidiomyc Tremellom Filobasidia Filobasidia Naganishia              | 0 | 0 | 0 | 0 |
| Basidiomyc Agaricomyc Sebacinaceae Serendipitaceae                   | 0 | 0 | 0 | 0 |
| Basidiomyc Agaricomyc Agaricales Entolomata Clitopilus               | 0 | 0 | 0 | 0 |
| Basidiomyc Agaricomyc Sebacinaceae                                   | 0 | 0 | 0 | 0 |
| Basidiomyc Tremellom Tremellales                                     | 0 | 0 | 0 | 0 |
| Basidiomyc Agaricomyc Russulales Russulaceae Russula                 | 2 | 0 | 0 | 0 |
| Basidiomyc Agaricomyc Polyporales Phanerochaete Phanerochaete        | 2 | 0 | 0 | 0 |
| Basidiomyc Agaricomyc Trechispor Hydnodont Trechispora               | 2 | 0 | 0 | 0 |
| Basidiomyc Agaricomyc Auriculariales                                 | 2 | 0 | 0 | 0 |
| Basidiomycota                                                        | 0 | 2 | 0 | 0 |
| Basidiomyc Tremellom Filobasidia Piskurozyn Solicoccozyma            | 0 | 2 | 0 | 0 |
| Basidiomyc Agaricomyc Agaricales Psathyrella Coprinopsis             | 0 | 2 | 0 | 0 |
| Basidiomyc Agaricomyc Sebacinaceae Serendipita Serendipita           | 0 | 2 | 0 | 0 |
| Basidiomyc Agaricomyc Agaricales Clavariaceae Clavulinopsis          | 0 | 0 | 2 | 0 |
| Basidiomycota                                                        | 0 | 0 | 2 | 0 |
| Basidiomyc Agaricomyc Boletales Gyrosporaceae Gyrosporaceae          | 0 | 0 | 2 | 0 |
| Basidiomyc Agaricomyc Trechispor Hydnodontaceae                      | 0 | 0 | 0 | 0 |
| Basidiomyc Pucciniomycetes Septobasidium Septobasidium Septobasidium | 0 | 0 | 0 | 0 |
| Basidiomyc Tremellom Tremellale: Bulleribasii Vishniacozyma          | 0 | 0 | 0 | 0 |
| Basidiomyc Malasseziaceae Malassezia Malassezia Malassezia           | 0 | 0 | 0 | 0 |
| Basidiomyc Agaricomyc Polyporales Podoscypha Rickiopsis              | 0 | 0 | 0 | 0 |
| Basidiomyc Agaricomyc Auricularia Exidiaceae                         | 0 | 0 | 0 | 0 |
| Basidiomyc Agaricomyc Auriculariales                                 | 0 | 0 | 0 | 0 |

|                                                              |       |       |      |     |
|--------------------------------------------------------------|-------|-------|------|-----|
| Basidiomyc Exobasidio Exobasidiales                          | 0     | 0     | 0    | 0   |
| Basidiomyc Tremellom Tremellales                             | 0     | 0     | 0    | 0   |
| Basidiomyc Agaricomyc Russulales Russulaceae Russula         | 0     | 0     | 0    | 0   |
| Basidiomyc Agaricomyc Agaricales Schizophyl Schizophyllum    | 0     | 0     | 0    | 0   |
| Basidiomyc Tremellom Cystofilob Cystofilob Cystofilobasidium | 0     | 0     | 0    | 0   |
| Basidiomyc Agaricomyc Polyporales Ganoderma Ganoderma        | 0     | 0     | 0    | 0   |
| Chytridiom Rhizophlyc Rhizophlyc Rhizophlyctidaceae          | 24    | 35    | 70   | 0   |
| Chytridiom Spizellomy Spizellomycetales                      | 56    | 35    | 0    | 0   |
| Chytridiomycota                                              | 3     | 60    | 10   | 0   |
| Chytridiom Rhizophlyc Rhizophlyc Rhizophlyc Rhizophlyctis    | 0     | 0     | 0    | 0   |
| Chytridiom Rhizophydi Rhizophydi Alphamyce Betamyces         | 0     | 0     | 0    | 0   |
| Chytridiom Rhizophydi Rhizophydiales                         | 0     | 14    | 0    | 0   |
| Chytridiom Rhizophydi Rhizophydiales                         | 12    | 0     | 0    | 0   |
| Chytridiom Spizellomy Spizellomy Spizellomy Spizellomyces    | 0     | 0     | 9    | 0   |
| Chytridiomycota                                              | 7     | 0     | 0    | 0   |
| Chytridiom Rhizophydi Rhizophydiales                         | 6     | 0     | 0    | 0   |
| Chytridiomycota                                              | 0     | 0     | 0    | 0   |
| Chytridiomycota                                              | 4     | 0     | 0    | 0   |
| Chytridiomycota                                              | 0     | 3     | 0    | 0   |
| Chytridiomycota                                              | 0     | 0     | 3    | 0   |
| Chytridiom Spizellomy Spizellomy Powellomycetaceae           | 0     | 2     | 0    | 0   |
| Chytridiom Spizellomy Spizellomy Powellomycetaceae           | 0     | 0     | 2    | 0   |
| Chytridiomycota                                              | 0     | 0     | 0    | 0   |
| Chytridiomycota                                              | 0     | 0     | 0    | 0   |
| Fungi                                                        | 0     | 30    | 0    | 586 |
| Fungi                                                        | 0     | 0     | 0    | 29  |
| Fungi                                                        | 14141 | 11095 | 279  | 0   |
| Fungi                                                        | 16613 | 6536  | 0    | 0   |
| Fungi                                                        | 0     | 18983 | 281  | 0   |
| Fungi                                                        | 0     | 0     | 0    | 109 |
| Fungi                                                        | 0     | 0     | 0    | 51  |
| Fungi                                                        | 0     | 0     | 0    | 0   |
| Fungi                                                        | 5154  | 2294  | 3074 | 0   |
| Fungi                                                        | 159   | 69    | 7260 | 0   |
| Fungi                                                        | 0     | 0     | 0    | 19  |
| Fungi                                                        | 0     | 0     | 0    | 0   |
| Fungi                                                        | 0     | 0     | 0    | 0   |
| Fungi                                                        | 0     | 0     | 0    | 0   |
| Fungi                                                        | 0     | 0     | 0    | 0   |
| Fungi                                                        | 0     | 0     | 0    | 0   |
| Fungi                                                        | 1556  | 724   | 884  | 0   |
| Fungi                                                        | 0     | 0     | 3137 | 0   |
| Fungi                                                        | 1320  | 520   | 701  | 0   |
| Fungi                                                        | 1405  | 504   | 711  | 0   |
| Fungi                                                        | 2614  | 0     | 0    | 0   |
| Fungi                                                        | 47    | 29    | 2501 | 0   |
| Fungi                                                        | 401   | 136   | 1896 | 0   |
| Fungi                                                        | 0     | 0     | 0    | 0   |
| Fungi                                                        | 0     | 0     | 0    | 0   |
| Fungi                                                        | 0     | 0     | 0    | 0   |

|       |      |     |      |     |
|-------|------|-----|------|-----|
| Fungi | 1142 | 368 | 712  | 0   |
| Fungi | 1267 | 353 | 524  | 0   |
| Fungi | 0    | 0   | 0    | 0   |
| Fungi | 1311 | 398 | 210  | 0   |
| Fungi | 0    | 0   | 0    | 167 |
| Fungi | 896  | 620 | 206  | 0   |
| Fungi | 0    | 896 | 0    | 220 |
| Fungi | 37   | 15  | 1454 | 0   |
| Fungi | 893  | 179 | 331  | 0   |
| Fungi | 1196 | 236 | 0    | 0   |
| Fungi | 0    | 0   | 0    | 0   |
| Fungi | 810  | 303 | 259  | 0   |
| Fungi | 660  | 345 | 193  | 0   |
| Fungi | 1151 | 25  | 27   | 0   |
| Fungi | 21   | 15  | 1127 | 0   |
| Fungi | 1161 | 0   | 0    | 0   |
| Fungi | 574  | 175 | 387  | 0   |
| Fungi | 517  | 193 | 233  | 0   |
| Fungi | 0    | 0   | 945  | 0   |
| Fungi | 0    | 0   | 0    | 0   |
| Fungi | 184  | 96  | 643  | 0   |
| Fungi | 0    | 0   | 0    | 0   |
| Fungi | 0    | 0   | 0    | 0   |
| Fungi | 0    | 0   | 0    | 9   |
| Fungi | 0    | 0   | 0    | 0   |
| Fungi | 504  | 64  | 166  | 0   |
| Fungi | 0    | 0   | 0    | 0   |
| Fungi | 0    | 0   | 0    | 0   |
| Fungi | 41   | 438 | 118  | 0   |
| Fungi | 0    | 0   | 46   | 4   |
| Fungi | 0    | 0   | 695  | 0   |
| Fungi | 100  | 6   | 12   | 8   |
| Fungi | 0    | 0   | 0    | 0   |
| Fungi | 224  | 173 | 231  | 0   |
| Fungi | 0    | 0   | 0    | 0   |
| Fungi | 0    | 0   | 0    | 0   |
| Fungi | 0    | 0   | 0    | 0   |
| Fungi | 11   | 480 | 10   | 0   |
| Fungi | 346  | 80  | 80   | 0   |
| Fungi | 0    | 0   | 0    | 0   |
| Fungi | 319  | 71  | 112  | 0   |
| Fungi | 0    | 0   | 502  | 0   |
| Fungi | 0    | 409 | 0    | 0   |
| Fungi | 0    | 0   | 0    | 0   |
| Fungi | 0    | 0   | 0    | 0   |
| Fungi | 0    | 0   | 457  | 0   |
| Fungi | 0    | 0   | 0    | 0   |
| Fungi | 0    | 0   | 0    | 419 |
| Fungi | 0    | 0   | 0    | 0   |
| Fungi | 291  | 110 | 0    | 0   |

|       |     |     |     |     |
|-------|-----|-----|-----|-----|
| Fungi | 0   | 0   | 0   | 399 |
| Fungi | 94  | 13  | 288 | 0   |
| Fungi | 0   | 0   | 0   | 0   |
| Fungi | 44  | 22  | 297 | 0   |
| Fungi | 391 | 0   | 0   | 0   |
| Fungi | 0   | 0   | 0   | 0   |
| Fungi | 294 | 91  | 0   | 0   |
| Fungi | 0   | 0   | 384 | 0   |
| Fungi | 303 | 0   | 73  | 0   |
| Fungi | 0   | 22  | 21  | 0   |
| Fungi | 360 | 0   | 0   | 0   |
| Fungi | 169 | 114 | 77  | 0   |
| Fungi | 0   | 0   | 0   | 0   |
| Fungi | 87  | 73  | 194 | 0   |
| Fungi | 0   | 0   | 0   | 0   |
| Fungi | 0   | 0   | 0   | 0   |
| Fungi | 320 | 0   | 0   | 0   |
| Fungi | 0   | 0   | 0   | 0   |
| Fungi | 229 | 0   | 87  | 0   |
| Fungi | 0   | 0   | 316 | 0   |
| Fungi | 0   | 0   | 0   | 0   |
| Fungi | 0   | 0   | 0   | 0   |
| Fungi | 0   | 0   | 308 | 0   |
| Fungi | 0   | 0   | 0   | 0   |
| Fungi | 0   | 0   | 0   | 0   |
| Fungi | 0   | 289 | 0   | 0   |
| Fungi | 0   | 0   | 0   | 0   |
| Fungi | 0   | 0   | 0   | 0   |
| Fungi | 282 | 0   | 0   | 0   |
| Fungi | 148 | 92  | 41  | 0   |
| Fungi | 180 | 91  | 0   | 0   |
| Fungi | 151 | 119 | 0   | 0   |
| Fungi | 133 | 83  | 47  | 0   |
| Fungi | 0   | 263 | 0   | 0   |
| Fungi | 262 | 0   | 0   | 0   |
| Fungi | 0   | 0   | 0   | 0   |
| Fungi | 0   | 0   | 0   | 0   |
| Fungi | 0   | 0   | 0   | 0   |
| Fungi | 0   | 0   | 0   | 244 |
| Fungi | 76  | 101 | 66  | 0   |
| Fungi | 236 | 0   | 0   | 0   |
| Fungi | 182 | 16  | 36  | 0   |
| Fungi | 0   | 0   | 0   | 0   |
| Fungi | 32  | 79  | 96  | 0   |
| Fungi | 196 | 0   | 22  | 0   |
| Fungi | 0   | 0   | 0   | 0   |
| Fungi | 0   | 0   | 215 | 0   |
| Fungi | 0   | 0   | 0   | 0   |
| Fungi | 196 | 0   | 0   | 0   |
| Fungi | 38  | 73  | 0   | 0   |

|                                                             |     |     |     |     |
|-------------------------------------------------------------|-----|-----|-----|-----|
| Fungi                                                       | 9   | 6   | 176 | 0   |
| Fungi                                                       | 162 | 0   | 27  | 0   |
| Fungi                                                       | 0   | 0   | 0   | 0   |
| Fungi                                                       | 179 | 0   | 0   | 0   |
| Fungi                                                       | 0   | 178 | 0   | 0   |
| Fungi                                                       | 0   | 0   | 0   | 0   |
| Fungi                                                       | 0   | 0   | 174 | 0   |
| Fungi                                                       | 172 | 0   | 0   | 0   |
| Fungi                                                       | 59  | 91  | 6   | 0   |
| Fungi                                                       | 0   | 0   | 0   | 0   |
| Fungi                                                       | 0   | 0   | 0   | 0   |
| Fungi                                                       | 0   | 166 | 0   | 0   |
| Fungi                                                       | 0   | 0   | 0   | 0   |
| Fungi                                                       | 159 | 0   | 0   | 0   |
| Fungi                                                       | 33  | 0   | 126 | 0   |
| Fungi                                                       | 8   | 7   | 137 | 0   |
| Fungi                                                       | 0   | 0   | 159 | 0   |
| Fungi                                                       | 0   | 0   | 0   | 0   |
| Fungi                                                       | 156 | 0   | 0   | 0   |
| Fungi                                                       | 0   | 0   | 0   | 0   |
| Fungi                                                       | 151 | 0   | 0   | 0   |
| Fungi                                                       | 151 | 0   | 0   | 0   |
| Fungi                                                       | 150 | 0   | 0   | 0   |
| Fungi                                                       | 0   | 150 | 0   | 0   |
| Fungi                                                       | 6   | 10  | 6   | 0   |
| Fungi                                                       | 19  | 22  | 107 | 0   |
| Fungi                                                       | 146 | 0   | 0   | 0   |
| Fungi                                                       | 0   | 144 | 0   | 0   |
| Fungi                                                       | 0   | 0   | 0   | 143 |
| Fungi                                                       | 140 | 0   | 0   | 0   |
| Fungi                                                       | 57  | 83  | 0   | 0   |
| Fungi                                                       | 136 | 0   | 0   | 0   |
| Fungi                                                       | 135 | 0   | 0   | 0   |
| Fungi                                                       | 135 | 0   | 0   | 0   |
| Fungi                                                       | 134 | 0   | 0   | 0   |
| Fungi                                                       | 0   | 0   | 134 | 0   |
| Fungi                                                       | 0   | 0   | 0   | 0   |
| Fungi                                                       | 0   | 0   | 0   | 0   |
| Fungi                                                       | 0   | 0   | 0   | 0   |
| Fungi                                                       | 114 | 16  | 0   | 0   |
| Glomerom Glomerom Glomerales: Glomerace Funneliformis       | 0   | 42  | 0   | 0   |
| Glomerom Glomerom Glomerales: Glomerace Rhizophagus         | 0   | 0   | 0   | 0   |
| Monoblepl Monoblepl Monoblepharidales                       | 0   | 0   | 0   | 0   |
| Mortierellc Mortierellc Mortierellc Mortierellc Mortierella | 172 | 129 | 102 | 0   |
| Mortierellc Mortierellc Mortierellc Mortierellc Mortierella | 170 | 133 | 88  | 0   |
| Mortierellc Mortierellc Mortierellc Mortierellc Mortierella | 112 | 94  | 78  | 0   |
| Mortierellc Mortierellc Mortierellc Mortierellc Mortierella | 146 | 70  | 58  | 0   |
| Mortierellc Mortierellc Mortierellc Mortierellc Mortierella | 68  | 72  | 47  | 0   |
| Mortierellc Mortierellc Mortierellc Mortierellc Mortierella | 74  | 66  | 30  | 0   |
| Mortierellc Mortierellc Mortierellc Mortierellc Mortierella | 57  | 48  | 22  | 0   |

|                                                                    |    |    |    |    |
|--------------------------------------------------------------------|----|----|----|----|
| Mortierellc Mortierellc Mortierellz Mortierellz Mortierella        | 69 | 0  | 36 | 0  |
| Mortierellc Mortierellc Mortierellz Mortierellz Mortierella        | 0  | 0  | 0  | 0  |
| Mortierellc Mortierellc Mortierellz Mortierellz Mortierellz gamsii | 31 | 33 | 0  | 0  |
| Mortierellc Mortierellc Mortierellz Mortierellz Mortierella        | 21 | 15 | 0  | 0  |
| Mortierellc Mortierellc Mortierellz Mortierellz Mortierella        | 0  | 0  | 0  | 0  |
| Mortierellc Mortierellc Mortierellz Mortierellz Mortierella        | 24 | 0  | 11 | 0  |
| Mortierellc Mortierellc Mortierellz Mortierellz Mortierella        | 0  | 0  | 0  | 25 |
| Mortierellc Mortierellc Mortierellz Mortierellz Mortierella        | 0  | 21 | 0  | 0  |
| Mortierellc Mortierellc Mortierellz Mortierellz Mortierella        | 16 | 0  | 0  | 0  |
| Mortierellc Mortierellc Mortierellz Mortierellz Mortierella        | 0  | 0  | 0  | 0  |
| Mortierellc Mortierellc Mortierellz Mortierellz Mortierella        | 0  | 0  | 0  | 0  |
| Mortierellomycota                                                  | 0  | 0  | 0  | 0  |
| Mortierellc Mortierellc Mortierellales                             | 0  | 0  | 0  | 0  |
| Mortierellc Mortierellc Mortierellz Mortierellz Mortierella        | 0  | 0  | 12 | 0  |
| Mortierellc Mortierellc Mortierellz Mortierellz Mortierella        | 0  | 11 | 0  | 0  |
| Mortierellc Mortierellc Mortierellz Mortierellz Mortierella        | 10 | 0  | 0  | 0  |
| Mortierellc Mortierellc Mortierellz Mortierellz Mortierella        | 0  | 0  | 0  | 0  |
| Mortierellc Mortierellc Mortierellz Mortierellz Mortierella        | 0  | 0  | 9  | 0  |
| Mortierellc Mortierellc Mortierellz Mortierellz Mortierella        | 6  | 0  | 0  | 0  |
| Mortierellc Mortierellc Mortierellz Mortierellz Mortierella        | 0  | 0  | 0  | 6  |
| Mortierellc Mortierellc Mortierellales                             | 0  | 0  | 0  | 0  |
| Mortierellc Mortierellc Mortierellz Mortierellz Mortierella        | 0  | 0  | 0  | 0  |
| Mortierellc Mortierellc Mortierellales                             | 5  | 0  | 0  | 0  |
| Mortierellc Mortierellc Mortierellz Mortierellz Mortierella        | 0  | 0  | 0  | 0  |
| Mortierellc Mortierellc Mortierellz Mortierellaceae                | 0  | 0  | 0  | 0  |
| Mortierellc Mortierellc Mortierellz Mortierellz Mortierella        | 0  | 0  | 0  | 0  |
| Mortierellc Mortierellc Mortierellz Mortierellz Mortierella        | 3  | 0  | 0  | 0  |
| Mortierellc Mortierellc Mortierellz Mortierellz Mortierella        | 0  | 3  | 0  | 0  |
| Mortierellc Mortierellc Mortierellz Mortierellz Mortierella        | 0  | 0  | 0  | 0  |
| Mortierellc Mortierellc Mortierellz Mortierellz Mortierella        | 0  | 0  | 0  | 0  |
| Olpidiomyi Olpidiomyi Olpidiales Olpidiaceae Olpidium              | 20 | 0  | 7  | 0  |
| Olpidiomyi Olpidiomyi Olpidiales Olpidiaceae Olpidium              | 23 | 4  | 17 | 0  |
| Rozellomyi Rozellomyi Branch03                                     | 0  | 0  | 0  | 0  |
| Rozellomycota                                                      | 0  | 0  | 0  | 0  |
| Rozellomycota                                                      | 0  | 0  | 0  | 0  |
| Rozellomycota                                                      | 0  | 0  | 0  | 0  |
| Rozellomycota                                                      | 0  | 0  | 0  | 0  |
| Rozellomycota                                                      | 0  | 0  | 0  | 0  |
| Rozellomycota                                                      | 0  | 0  | 0  | 0  |
| Rozellomycota                                                      | 0  | 5  | 0  | 0  |
| Rozellomycota                                                      | 0  | 0  | 0  | 0  |
| Rozellomyi Rozellomyi GS11                                         | 0  | 3  | 0  | 0  |
| Zoopagomycota                                                      | 7  | 0  | 0  | 0  |
| Zoopagomycota                                                      | 4  | 0  | 0  | 0  |
| Zoopagom Zoopagom Zoopagalei Piptocephz Syncephalis                | 0  | 0  | 3  | 0  |
| Zoopagom Zoopagom Zoopagalei Piptocephz Syncephalis                | 2  | 0  | 0  | 0  |
| Zoopagomycota                                                      | 0  | 2  | 0  | 0  |
| Zoopagom Zoopagom Zoopagalei Piptocephz Syncephalis                | 0  | 0  | 2  | 0  |
| Fungi                                                              | 0  | 0  | 0  | 0  |

|       |     |     |     |     |
|-------|-----|-----|-----|-----|
| Fungi | 0   | 121 | 0   | 0   |
| Fungi | 0   | 0   | 121 | 0   |
| Fungi | 0   | 0   | 120 | 0   |
| Fungi | 119 | 0   | 0   | 0   |
| Fungi | 0   | 118 | 0   | 0   |
| Fungi | 0   | 0   | 0   | 0   |
| Fungi | 0   | 0   | 0   | 0   |
| Fungi | 115 | 0   | 0   | 0   |
| Fungi | 115 | 0   | 0   | 0   |
| Fungi | 0   | 0   | 0   | 4   |
| Fungi | 114 | 0   | 0   | 0   |
| Fungi | 0   | 114 | 0   | 0   |
| Fungi | 69  | 44  | 0   | 0   |
| Fungi | 0   | 0   | 0   | 113 |
| Fungi | 112 | 0   | 0   | 0   |
| Fungi | 0   | 0   | 0   | 0   |
| Fungi | 0   | 0   | 0   | 0   |
| Fungi | 108 | 0   | 0   | 0   |
| Fungi | 106 | 0   | 0   | 0   |
| Fungi | 106 | 0   | 0   | 0   |
| Fungi | 0   | 106 | 0   | 0   |
| Fungi | 0   | 0   | 0   | 0   |
| Fungi | 0   | 0   | 104 | 0   |
| Fungi | 0   | 0   | 0   | 0   |
| Fungi | 57  | 0   | 45  | 0   |
| Fungi | 0   | 102 | 0   | 0   |
| Fungi | 0   | 101 | 0   | 0   |
| Fungi | 0   | 100 | 0   | 0   |
| Fungi | 99  | 0   | 0   | 0   |
| Fungi | 0   | 0   | 0   | 99  |
| Fungi | 98  | 0   | 0   | 0   |
| Fungi | 0   | 97  | 0   | 0   |
| Fungi | 0   | 97  | 0   | 0   |
| Fungi | 0   | 97  | 0   | 0   |
| Fungi | 0   | 0   | 0   | 0   |
| Fungi | 0   | 62  | 0   | 0   |
| Fungi | 0   | 0   | 96  | 0   |
| Fungi | 0   | 0   | 10  | 0   |
| Fungi | 95  | 0   | 0   | 0   |
| Fungi | 95  | 0   | 0   | 0   |
| Fungi | 95  | 0   | 0   | 0   |
| Fungi | 0   | 0   | 0   | 0   |
| Fungi | 94  | 0   | 0   | 0   |
| Fungi | 0   | 93  | 0   | 0   |
| Fungi | 0   | 93  | 0   | 0   |
| Fungi | 0   | 0   | 93  | 0   |
| Fungi | 92  | 0   | 0   | 0   |
| Fungi | 0   | 0   | 0   | 0   |
| Fungi | 90  | 0   | 0   | 0   |
| Fungi | 46  | 43  | 0   | 0   |



|       |    |    |    |   |
|-------|----|----|----|---|
| Fungi | 0  | 89 | 0  | 0 |
| Fungi | 0  | 89 | 0  | 0 |
| Fungi | 0  | 0  | 3  | 0 |
| Fungi | 0  | 0  | 0  | 0 |
| Fungi | 0  | 88 | 0  | 0 |
| Fungi | 0  | 0  | 0  | 0 |
| Fungi | 0  | 0  | 0  | 0 |
| Fungi | 0  | 86 | 0  | 0 |
| Fungi | 0  | 86 | 0  | 0 |
| Fungi | 0  | 86 | 0  | 0 |
| Fungi | 0  | 86 | 0  | 0 |
| Fungi | 84 | 0  | 0  | 0 |
| Fungi | 84 | 0  | 0  | 0 |
| Fungi | 84 | 0  | 0  | 0 |
| Fungi | 0  | 84 | 0  | 0 |
| Fungi | 0  | 84 | 0  | 0 |
| Fungi | 83 | 0  | 0  | 0 |
| Fungi | 83 | 0  | 0  | 0 |
| Fungi | 49 | 34 | 0  | 0 |
| Fungi | 0  | 83 | 0  | 0 |
| Fungi | 0  | 0  | 83 | 0 |
| Fungi | 0  | 0  | 0  | 0 |
| Fungi | 0  | 82 | 0  | 0 |
| Fungi | 0  | 0  | 82 | 0 |
| Fungi | 81 | 0  | 0  | 0 |
| Fungi | 2  | 0  | 79 | 0 |
| Fungi | 0  | 81 | 0  | 0 |
| Fungi | 80 | 0  | 0  | 0 |
| Fungi | 5  | 0  | 75 | 0 |
| Fungi | 0  | 80 | 0  | 0 |
| Fungi | 0  | 0  | 0  | 0 |
| Fungi | 79 | 0  | 0  | 0 |
| Fungi | 0  | 0  | 0  | 0 |
| Fungi | 0  | 0  | 78 | 0 |
| Fungi | 0  | 0  | 0  | 0 |
| Fungi | 0  | 77 | 0  | 0 |
| Fungi | 0  | 77 | 0  | 0 |
| Fungi | 76 | 0  | 0  | 0 |
| Fungi | 0  | 76 | 0  | 0 |
| Fungi | 0  | 75 | 0  | 0 |
| Fungi | 0  | 75 | 0  | 0 |
| Fungi | 0  | 0  | 0  | 0 |
| Fungi | 74 | 0  | 0  | 0 |
| Fungi | 74 | 0  | 0  | 0 |
| Fungi | 74 | 0  | 0  | 0 |
| Fungi | 51 | 0  | 23 | 0 |
| Fungi | 39 | 13 | 22 | 0 |
| Fungi | 0  | 74 | 0  | 0 |
| Fungi | 0  | 74 | 0  | 0 |
| Fungi | 0  | 0  | 74 | 0 |

|       |    |    |    |   |
|-------|----|----|----|---|
| Fungi | 73 | 0  | 0  | 0 |
| Fungi | 0  | 73 | 0  | 0 |
| Fungi | 72 | 0  | 0  | 0 |
| Fungi | 72 | 0  | 0  | 0 |
| Fungi | 22 | 0  | 15 | 0 |
| Fungi | 0  | 0  | 0  | 0 |
| Fungi | 0  | 70 | 0  | 0 |
| Fungi | 0  | 70 | 0  | 0 |
| Fungi | 0  | 0  | 0  | 0 |
| Fungi | 69 | 0  | 0  | 0 |
| Fungi | 69 | 0  | 0  | 0 |
| Fungi | 69 | 0  | 0  | 0 |
| Fungi | 69 | 0  | 0  | 0 |
| Fungi | 50 | 19 | 0  | 0 |
| Fungi | 46 | 0  | 23 | 0 |
| Fungi | 0  | 69 | 0  | 0 |
| Fungi | 0  | 0  | 0  | 0 |
| Fungi | 68 | 0  | 0  | 0 |
| Fungi | 68 | 0  | 0  | 0 |
| Fungi | 68 | 0  | 0  | 0 |
| Fungi | 68 | 0  | 0  | 0 |
| Fungi | 0  | 68 | 0  | 0 |
| Fungi | 0  | 0  | 0  | 0 |
| Fungi | 0  | 0  | 0  | 0 |
| Fungi | 0  | 67 | 0  | 0 |
| Fungi | 0  | 67 | 0  | 0 |
| Fungi | 46 | 20 | 0  | 0 |
| Fungi | 0  | 0  | 66 | 0 |
| Fungi | 65 | 0  | 0  | 0 |
| Fungi | 65 | 0  | 0  | 0 |
| Fungi | 65 | 0  | 0  | 0 |
| Fungi | 65 | 0  | 0  | 0 |
| Fungi | 64 | 0  | 0  | 0 |
| Fungi | 64 | 0  | 0  | 0 |
| Fungi | 64 | 0  | 0  | 0 |
| Fungi | 0  | 64 | 0  | 0 |
| Fungi | 0  | 64 | 0  | 0 |
| Fungi | 0  | 64 | 0  | 0 |
| Fungi | 0  | 64 | 0  | 0 |
| Fungi | 63 | 0  | 0  | 0 |
| Fungi | 63 | 0  | 0  | 0 |
| Fungi | 63 | 0  | 0  | 0 |
| Fungi | 63 | 0  | 0  | 0 |
| Fungi | 0  | 63 | 0  | 0 |
| Fungi | 0  | 0  | 0  | 0 |
| Fungi | 9  | 13 | 40 | 0 |
| Fungi | 0  | 62 | 0  | 0 |
| Fungi | 61 | 0  | 0  | 0 |
| Fungi | 61 | 0  | 0  | 0 |
| Fungi | 0  | 61 | 0  | 0 |

|       |    |    |    |   |
|-------|----|----|----|---|
| Fungi | 60 | 0  | 0  | 0 |
| Fungi | 0  | 60 | 0  | 0 |
| Fungi | 0  | 60 | 0  | 0 |
| Fungi | 0  | 60 | 0  | 0 |
| Fungi | 0  | 60 | 0  | 0 |
| Fungi | 0  | 0  | 0  | 0 |
| Fungi | 0  | 0  | 59 | 0 |
| Fungi | 58 | 0  | 0  | 0 |
| Fungi | 58 | 0  | 0  | 0 |
| Fungi | 58 | 0  | 0  | 0 |
| Fungi | 58 | 0  | 0  | 0 |
| Fungi | 58 | 0  | 0  | 0 |
| Fungi | 58 | 0  | 0  | 0 |
| Fungi | 0  | 58 | 0  | 0 |
| Fungi | 0  | 58 | 0  | 0 |
| Fungi | 0  | 58 | 0  | 0 |
| Fungi | 0  | 0  | 0  | 0 |
| Fungi | 57 | 0  | 0  | 0 |
| Fungi | 57 | 0  | 0  | 0 |
| Fungi | 57 | 0  | 0  | 0 |
| Fungi | 57 | 0  | 0  | 0 |
| Fungi | 57 | 0  | 0  | 0 |
| Fungi | 7  | 10 | 6  | 0 |
| Fungi | 0  | 57 | 0  | 0 |
| Fungi | 0  | 57 | 0  | 0 |
| Fungi | 56 | 0  | 0  | 0 |
| Fungi | 56 | 0  | 0  | 0 |
| Fungi | 25 | 31 | 0  | 0 |
| Fungi | 0  | 56 | 0  | 0 |
| Fungi | 0  | 56 | 0  | 0 |
| Fungi | 0  | 0  | 56 | 0 |
| Fungi | 55 | 0  | 0  | 0 |
| Fungi | 49 | 0  | 6  | 0 |
| Fungi | 30 | 25 | 0  | 0 |
| Fungi | 0  | 55 | 0  | 0 |
| Fungi | 0  | 55 | 0  | 0 |
| Fungi | 0  | 0  | 0  | 0 |
| Fungi | 54 | 0  | 0  | 0 |
| Fungi | 54 | 0  | 0  | 0 |
| Fungi | 54 | 0  | 0  | 0 |
| Fungi | 54 | 0  | 0  | 0 |
| Fungi | 0  | 54 | 0  | 0 |
| Fungi | 0  | 54 | 0  | 0 |
| Fungi | 0  | 54 | 0  | 0 |
| Fungi | 0  | 54 | 0  | 0 |
| Fungi | 0  | 54 | 0  | 0 |
| Fungi | 0  | 54 | 0  | 0 |
| Fungi | 0  | 54 | 0  | 0 |
| Fungi | 53 | 0  | 0  | 0 |
| Fungi | 53 | 0  | 0  | 0 |

|       |    |    |    |    |
|-------|----|----|----|----|
| Fungi | 53 | 0  | 0  | 0  |
| Fungi | 53 | 0  | 0  | 0  |
| Fungi | 53 | 0  | 0  | 0  |
| Fungi | 0  | 53 | 0  | 0  |
| Fungi | 0  | 53 | 0  | 0  |
| Fungi | 0  | 53 | 0  | 0  |
| Fungi | 0  | 0  | 0  | 53 |
| Fungi | 0  | 0  | 0  | 0  |
| Fungi | 52 | 0  | 0  | 0  |
| Fungi | 52 | 0  | 0  | 0  |
| Fungi | 0  | 52 | 0  | 0  |
| Fungi | 0  | 52 | 0  | 0  |
| Fungi | 0  | 52 | 0  | 0  |
| Fungi | 0  | 9  | 4  | 0  |
| Fungi | 0  | 0  | 0  | 0  |
| Fungi | 0  | 0  | 0  | 0  |
| Fungi | 51 | 0  | 0  | 0  |
| Fungi | 0  | 51 | 0  | 0  |
| Fungi | 0  | 51 | 0  | 0  |
| Fungi | 0  | 51 | 0  | 0  |
| Fungi | 0  | 0  | 51 | 0  |
| Fungi | 0  | 0  | 51 | 0  |
| Fungi | 0  | 0  | 0  | 0  |
| Fungi | 50 | 0  | 0  | 0  |
| Fungi | 50 | 0  | 0  | 0  |
| Fungi | 50 | 0  | 0  | 0  |
| Fungi | 0  | 50 | 0  | 0  |
| Fungi | 0  | 50 | 0  | 0  |
| Fungi | 0  | 0  | 50 | 0  |
| Fungi | 0  | 0  | 50 | 0  |
| Fungi | 0  | 0  | 0  | 50 |
| Fungi | 0  | 0  | 0  | 0  |
| Fungi | 0  | 0  | 0  | 0  |
| Fungi | 49 | 0  | 0  | 0  |
| Fungi | 49 | 0  | 0  | 0  |
| Fungi | 49 | 0  | 0  | 0  |
| Fungi | 49 | 0  | 0  | 0  |
| Fungi | 49 | 0  | 0  | 0  |
| Fungi | 49 | 0  | 0  | 0  |
| Fungi | 49 | 0  | 0  | 0  |
| Fungi | 0  | 49 | 0  | 0  |
| Fungi | 0  | 49 | 0  | 0  |
| Fungi | 0  | 49 | 0  | 0  |
| Fungi | 0  | 0  | 0  | 0  |
| Fungi | 48 | 0  | 0  | 0  |
| Fungi | 48 | 0  | 0  | 0  |
| Fungi | 48 | 0  | 0  | 0  |
| Fungi | 48 | 0  | 0  | 0  |
| Fungi | 48 | 0  | 0  | 0  |
| Fungi | 0  | 48 | 0  | 0  |

|       |    |    |    |   |
|-------|----|----|----|---|
| Fungi | 0  | 48 | 0  | 0 |
| Fungi | 0  | 48 | 0  | 0 |
| Fungi | 0  | 48 | 0  | 0 |
| Fungi | 0  | 48 | 0  | 0 |
| Fungi | 0  | 48 | 0  | 0 |
| Fungi | 0  | 48 | 0  | 0 |
| Fungi | 0  | 0  | 0  | 0 |
| Fungi | 47 | 0  | 0  | 0 |
| Fungi | 47 | 0  | 0  | 0 |
| Fungi | 47 | 0  | 0  | 0 |
| Fungi | 47 | 0  | 0  | 0 |
| Fungi | 47 | 0  | 0  | 0 |
| Fungi | 30 | 17 | 0  | 0 |
| Fungi | 0  | 47 | 0  | 0 |
| Fungi | 0  | 47 | 0  | 0 |
| Fungi | 0  | 47 | 0  | 0 |
| Fungi | 0  | 0  | 0  | 0 |
| Fungi | 46 | 0  | 0  | 0 |
| Fungi | 46 | 0  | 0  | 0 |
| Fungi | 46 | 0  | 0  | 0 |
| Fungi | 0  | 46 | 0  | 0 |
| Fungi | 0  | 46 | 0  | 0 |
| Fungi | 0  | 46 | 0  | 0 |
| Fungi | 0  | 0  | 46 | 0 |
| Fungi | 0  | 0  | 0  | 0 |
| Fungi | 45 | 0  | 0  | 0 |
| Fungi | 45 | 0  | 0  | 0 |
| Fungi | 45 | 0  | 0  | 0 |
| Fungi | 45 | 0  | 0  | 0 |
| Fungi | 45 | 0  | 0  | 0 |
| Fungi | 45 | 0  | 0  | 0 |
| Fungi | 45 | 0  | 0  | 0 |
| Fungi | 0  | 45 | 0  | 0 |
| Fungi | 0  | 45 | 0  | 0 |
| Fungi | 0  | 45 | 0  | 0 |
| Fungi | 0  | 45 | 0  | 0 |
| Fungi | 0  | 45 | 0  | 0 |
| Fungi | 0  | 41 | 0  | 0 |
| Fungi | 44 | 0  | 0  | 0 |
| Fungi | 44 | 0  | 0  | 0 |
| Fungi | 44 | 0  | 0  | 0 |
| Fungi | 0  | 44 | 0  | 0 |
| Fungi | 0  | 44 | 0  | 0 |
| Fungi | 0  | 44 | 0  | 0 |
| Fungi | 43 | 0  | 0  | 0 |
| Fungi | 43 | 0  | 0  | 0 |
| Fungi | 43 | 0  | 0  | 0 |
| Fungi | 43 | 0  | 0  | 0 |
| Fungi | 43 | 0  | 0  | 0 |

[illegible]

[illegible]

|       |    |    |    |    |
|-------|----|----|----|----|
| Fungi | 35 | 0  | 0  | 0  |
| Fungi | 35 | 0  | 0  | 0  |
| Fungi | 35 | 0  | 0  | 0  |
| Fungi | 35 | 0  | 0  | 0  |
| Fungi | 35 | 0  | 0  | 0  |
| Fungi | 0  | 35 | 0  | 0  |
| Fungi | 0  | 35 | 0  | 0  |
| Fungi | 0  | 35 | 0  | 0  |
| Fungi | 0  | 35 | 0  | 0  |
| Fungi | 0  | 0  | 0  | 0  |
| Fungi | 0  | 0  | 0  | 0  |
| Fungi | 0  | 0  | 0  | 0  |
| Fungi | 34 | 0  | 0  | 0  |
| Fungi | 34 | 0  | 0  | 0  |
| Fungi | 34 | 0  | 0  | 0  |
| Fungi | 34 | 0  | 0  | 0  |
| Fungi | 34 | 0  | 0  | 0  |
| Fungi | 34 | 0  | 0  | 0  |
| Fungi | 34 | 0  | 0  | 0  |
| Fungi | 34 | 0  | 0  | 0  |
| Fungi | 34 | 0  | 0  | 0  |
| Fungi | 34 | 0  | 0  | 0  |
| Fungi | 8  | 0  | 0  | 0  |
| Fungi | 6  | 0  | 0  | 0  |
| Fungi | 0  | 34 | 0  | 0  |
| Fungi | 0  | 0  | 0  | 34 |
| Fungi | 0  | 0  | 0  | 0  |
| Fungi | 0  | 0  | 0  | 0  |
| Fungi | 33 | 0  | 0  | 0  |
| Fungi | 33 | 0  | 0  | 0  |
| Fungi | 33 | 0  | 0  | 0  |
| Fungi | 33 | 0  | 0  | 0  |
| Fungi | 33 | 0  | 0  | 0  |
| Fungi | 33 | 0  | 0  | 0  |
| Fungi | 33 | 0  | 0  | 0  |
| Fungi | 33 | 0  | 0  | 0  |
| Fungi | 33 | 0  | 0  | 0  |
| Fungi | 33 | 0  | 0  | 0  |
| Fungi | 33 | 0  | 0  | 0  |
| Fungi | 0  | 33 | 0  | 0  |
| Fungi | 0  | 33 | 0  | 0  |
| Fungi | 0  | 33 | 0  | 0  |
| Fungi | 0  | 5  | 13 | 0  |
| Fungi | 0  | 0  | 33 | 0  |
| Fungi | 0  | 0  | 0  | 0  |
| Fungi | 0  | 0  | 0  | 0  |
| Fungi | 0  | 0  | 0  | 0  |
| Fungi | 32 | 0  | 0  | 0  |
| Fungi | 32 | 0  | 0  | 0  |
| Fungi | 32 | 0  | 0  | 0  |
| Fungi | 32 | 0  | 0  | 0  |



|       |    |    |    |   |
|-------|----|----|----|---|
| Fungi | 32 | 0  | 0  | 0 |
| Fungi | 32 | 0  | 0  | 0 |
| Fungi | 32 | 0  | 0  | 0 |
| Fungi | 32 | 0  | 0  | 0 |
| Fungi | 32 | 0  | 0  | 0 |
| Fungi | 32 | 0  | 0  | 0 |
| Fungi | 32 | 0  | 0  | 0 |
| Fungi | 32 | 0  | 0  | 0 |
| Fungi | 32 | 0  | 0  | 0 |
| Fungi | 32 | 0  | 0  | 0 |
| Fungi | 32 | 0  | 0  | 0 |
| Fungi | 0  | 32 | 0  | 0 |
| Fungi | 0  | 32 | 0  | 0 |
| Fungi | 0  | 32 | 0  | 0 |
| Fungi | 0  | 0  | 5  | 0 |
| Fungi | 0  | 0  | 0  | 0 |
| Fungi | 31 | 0  | 0  | 0 |
| Fungi | 31 | 0  | 0  | 0 |
| Fungi | 31 | 0  | 0  | 0 |
| Fungi | 31 | 0  | 0  | 0 |
| Fungi | 31 | 0  | 0  | 0 |
| Fungi | 31 | 0  | 0  | 0 |
| Fungi | 31 | 0  | 0  | 0 |
| Fungi | 31 | 0  | 0  | 0 |
| Fungi | 31 | 0  | 0  | 0 |
| Fungi | 31 | 0  | 0  | 0 |
| Fungi | 31 | 0  | 0  | 0 |
| Fungi | 31 | 0  | 0  | 0 |
| Fungi | 31 | 0  | 0  | 0 |
| Fungi | 0  | 31 | 0  | 0 |
| Fungi | 0  | 31 | 0  | 0 |
| Fungi | 0  | 31 | 0  | 0 |
| Fungi | 0  | 31 | 0  | 0 |
| Fungi | 0  | 0  | 31 | 0 |
| Fungi | 0  | 0  | 0  | 0 |
| Fungi | 0  | 0  | 0  | 0 |
| Fungi | 30 | 0  | 0  | 0 |
| Fungi | 30 | 0  | 0  | 0 |
| Fungi | 30 | 0  | 0  | 0 |
| Fungi | 30 | 0  | 0  | 0 |
| Fungi | 30 | 0  | 0  | 0 |
| Fungi | 0  | 30 | 0  | 0 |
| Fungi | 0  | 30 | 0  | 0 |
| Fungi | 0  | 30 | 0  | 0 |
| Fungi | 0  | 30 | 0  | 0 |
| Fungi | 0  | 30 | 0  | 0 |
| Fungi | 0  | 30 | 0  | 0 |
| Fungi | 0  | 30 | 0  | 0 |
| Fungi | 0  | 10 | 0  | 0 |
| Fungi | 0  | 2  | 0  | 0 |

|       |    |    |    |   |
|-------|----|----|----|---|
| Fungi | 0  | 0  | 30 | 0 |
| Fungi | 0  | 0  | 0  | 0 |
| Fungi | 0  | 0  | 0  | 0 |
| Fungi | 0  | 0  | 0  | 0 |
| Fungi | 0  | 0  | 0  | 0 |
| Fungi | 29 | 0  | 0  | 0 |
| Fungi | 29 | 0  | 0  | 0 |
| Fungi | 29 | 0  | 0  | 0 |
| Fungi | 29 | 0  | 0  | 0 |
| Fungi | 29 | 0  | 0  | 0 |
| Fungi | 29 | 0  | 0  | 0 |
| Fungi | 29 | 0  | 0  | 0 |
| Fungi | 29 | 0  | 0  | 0 |
| Fungi | 12 | 17 | 0  | 0 |
| Fungi | 0  | 29 | 0  | 0 |
| Fungi | 0  | 29 | 0  | 0 |
| Fungi | 0  | 29 | 0  | 0 |
| Fungi | 0  | 29 | 0  | 0 |
| Fungi | 0  | 29 | 0  | 0 |
| Fungi | 0  | 29 | 0  | 0 |
| Fungi | 0  | 0  | 29 | 0 |
| Fungi | 0  | 0  | 0  | 0 |
| Fungi | 0  | 0  | 0  | 0 |
| Fungi | 0  | 0  | 0  | 0 |
| Fungi | 0  | 0  | 0  | 0 |
| Fungi | 28 | 0  | 0  | 0 |
| Fungi | 28 | 0  | 0  | 0 |
| Fungi | 28 | 0  | 0  | 0 |
| Fungi | 28 | 0  | 0  | 0 |
| Fungi | 28 | 0  | 0  | 0 |
| Fungi | 28 | 0  | 0  | 0 |
| Fungi | 28 | 0  | 0  | 0 |
| Fungi | 28 | 0  | 0  | 0 |
| Fungi | 28 | 0  | 0  | 0 |
| Fungi | 28 | 0  | 0  | 0 |
| Fungi | 0  | 28 | 0  | 0 |
| Fungi | 0  | 28 | 0  | 0 |
| Fungi | 0  | 28 | 0  | 0 |
| Fungi | 0  | 28 | 0  | 0 |
| Fungi | 0  | 28 | 0  | 0 |
| Fungi | 0  | 28 | 0  | 0 |
| Fungi | 0  | 28 | 0  | 0 |
| Fungi | 0  | 28 | 0  | 0 |
| Fungi | 0  | 0  | 0  | 0 |
| Fungi | 0  | 0  | 0  | 0 |
| Fungi | 0  | 0  | 0  | 0 |
| Fungi | 0  | 0  | 0  | 0 |
| Fungi | 0  | 0  | 0  | 0 |
| Fungi | 27 | 0  | 0  | 0 |
| Fungi | 27 | 0  | 0  | 0 |

[illegible]

[illegible]

[illegible]

|       |    |    |    |   |
|-------|----|----|----|---|
| Fungi | 22 | 0  | 0  | 0 |
| Fungi | 8  | 0  | 0  | 0 |
| Fungi | 0  | 22 | 0  | 0 |
| Fungi | 0  | 22 | 0  | 0 |
| Fungi | 0  | 22 | 0  | 0 |
| Fungi | 0  | 22 | 0  | 0 |
| Fungi | 0  | 22 | 0  | 0 |
| Fungi | 0  | 22 | 0  | 0 |
| Fungi | 0  | 22 | 0  | 0 |
| Fungi | 0  | 22 | 0  | 0 |
| Fungi | 0  | 22 | 0  | 0 |
| Fungi | 0  | 22 | 0  | 0 |
| Fungi | 0  | 22 | 0  | 0 |
| Fungi | 0  | 14 | 8  | 0 |
| Fungi | 0  | 0  | 22 | 0 |
| Fungi | 0  | 0  | 0  | 0 |
| Fungi | 0  | 0  | 0  | 0 |
| Fungi | 0  | 0  | 0  | 0 |
| Fungi | 0  | 0  | 0  | 0 |
| Fungi | 0  | 0  | 0  | 0 |
| Fungi | 21 | 0  | 0  | 0 |
| Fungi | 21 | 0  | 0  | 0 |
| Fungi | 21 | 0  | 0  | 0 |
| Fungi | 21 | 0  | 0  | 0 |
| Fungi | 21 | 0  | 0  | 0 |
| Fungi | 21 | 0  | 0  | 0 |
| Fungi | 21 | 0  | 0  | 0 |
| Fungi | 21 | 0  | 0  | 0 |
| Fungi | 21 | 0  | 0  | 0 |
| Fungi | 21 | 0  | 0  | 0 |
| Fungi | 21 | 0  | 0  | 0 |
| Fungi | 21 | 0  | 0  | 0 |
| Fungi | 21 | 0  | 0  | 0 |
| Fungi | 21 | 0  | 0  | 0 |
| Fungi | 21 | 0  | 0  | 0 |
| Fungi | 21 | 0  | 0  | 0 |
| Fungi | 21 | 0  | 0  | 0 |
| Fungi | 21 | 0  | 0  | 0 |
| Fungi | 21 | 0  | 0  | 0 |
| Fungi | 21 | 0  | 0  | 0 |
| Fungi | 10 | 4  | 0  | 0 |
| Fungi | 0  | 21 | 0  | 0 |
| Fungi | 0  | 21 | 0  | 0 |
| Fungi | 0  | 21 | 0  | 0 |
| Fungi | 0  | 21 | 0  | 0 |
| Fungi | 0  | 21 | 0  | 0 |
| Fungi | 0  | 21 | 0  | 0 |
| Fungi | 0  | 0  | 21 | 0 |
| Fungi | 0  | 0  | 0  | 0 |
| Fungi | 0  | 0  | 0  | 0 |
| Fungi | 20 | 0  | 0  | 0 |
| Fungi | 20 | 0  | 0  | 0 |

[illegible]

[illegible]



|       |    |    |    |   |
|-------|----|----|----|---|
| Fungi | 17 | 0  | 0  | 0 |
| Fungi | 17 | 0  | 0  | 0 |
| Fungi | 17 | 0  | 0  | 0 |
| Fungi | 17 | 0  | 0  | 0 |
| Fungi | 17 | 0  | 0  | 0 |
| Fungi | 17 | 0  | 0  | 0 |
| Fungi | 17 | 0  | 0  | 0 |
| Fungi | 17 | 0  | 0  | 0 |
| Fungi | 17 | 0  | 0  | 0 |
| Fungi | 17 | 0  | 0  | 0 |
| Fungi | 0  | 17 | 0  | 0 |
| Fungi | 0  | 17 | 0  | 0 |
| Fungi | 0  | 17 | 0  | 0 |
| Fungi | 0  | 17 | 0  | 0 |
| Fungi | 0  | 17 | 0  | 0 |
| Fungi | 0  | 17 | 0  | 0 |
| Fungi | 0  | 17 | 0  | 0 |
| Fungi | 0  | 17 | 0  | 0 |
| Fungi | 0  | 17 | 0  | 0 |
| Fungi | 0  | 0  | 17 | 0 |
| Fungi | 0  | 0  | 17 | 0 |
| Fungi | 0  | 0  | 17 | 0 |
| Fungi | 0  | 0  | 0  | 0 |
| Fungi | 0  | 0  | 0  | 0 |
| Fungi | 0  | 0  | 0  | 0 |
| Fungi | 0  | 0  | 0  | 0 |
| Fungi | 0  | 0  | 0  | 0 |
| Fungi | 16 | 0  | 0  | 0 |
| Fungi | 16 | 0  | 0  | 0 |
| Fungi | 16 | 0  | 0  | 0 |
| Fungi | 16 | 0  | 0  | 0 |
| Fungi | 16 | 0  | 0  | 0 |
| Fungi | 16 | 0  | 0  | 0 |
| Fungi | 16 | 0  | 0  | 0 |
| Fungi | 16 | 0  | 0  | 0 |
| Fungi | 16 | 0  | 0  | 0 |
| Fungi | 16 | 0  | 0  | 0 |
| Fungi | 16 | 0  | 0  | 0 |
| Fungi | 16 | 0  | 0  | 0 |
| Fungi | 16 | 0  | 0  | 0 |
| Fungi | 16 | 0  | 0  | 0 |
| Fungi | 16 | 0  | 0  | 0 |
| Fungi | 16 | 0  | 0  | 0 |
| Fungi | 16 | 0  | 0  | 0 |
| Fungi | 16 | 0  | 0  | 0 |
| Fungi | 16 | 0  | 0  | 0 |
| Fungi | 16 | 0  | 0  | 0 |
| Fungi | 16 | 0  | 0  | 0 |
| Fungi | 16 | 0  | 0  | 0 |
| Fungi | 9  | 7  | 0  | 0 |
| Fungi | 7  | 0  | 0  | 0 |
| Fungi | 0  | 16 | 0  | 0 |
| Fungi | 0  | 16 | 0  | 0 |

[illegible]

|       |    |    |    |    |
|-------|----|----|----|----|
| Fungi | 10 | 0  | 0  | 0  |
| Fungi | 6  | 0  | 0  | 0  |
| Fungi | 0  | 14 | 0  | 0  |
| Fungi | 0  | 14 | 0  | 0  |
| Fungi | 0  | 14 | 0  | 0  |
| Fungi | 0  | 14 | 0  | 0  |
| Fungi | 0  | 14 | 0  | 0  |
| Fungi | 0  | 14 | 0  | 0  |
| Fungi | 0  | 14 | 0  | 0  |
| Fungi | 0  | 14 | 0  | 0  |
| Fungi | 0  | 14 | 0  | 0  |
| Fungi | 0  | 14 | 0  | 0  |
| Fungi | 0  | 0  | 14 | 0  |
| Fungi | 0  | 0  | 0  | 14 |
| Fungi | 0  | 0  | 0  | 0  |
| Fungi | 0  | 0  | 0  | 0  |
| Fungi | 0  | 0  | 0  | 0  |
| Fungi | 0  | 0  | 0  | 0  |
| Fungi | 0  | 0  | 0  | 0  |
| Fungi | 0  | 0  | 0  | 0  |
| Fungi | 0  | 0  | 0  | 0  |
| Fungi | 0  | 0  | 0  | 0  |
| Fungi | 0  | 0  | 0  | 0  |
| Fungi | 0  | 0  | 0  | 0  |
| Fungi | 13 | 0  | 0  | 0  |
| Fungi | 13 | 0  | 0  | 0  |
| Fungi | 13 | 0  | 0  | 0  |
| Fungi | 13 | 0  | 0  | 0  |
| Fungi | 13 | 0  | 0  | 0  |
| Fungi | 13 | 0  | 0  | 0  |
| Fungi | 0  | 13 | 0  | 0  |
| Fungi | 0  | 13 | 0  | 0  |
| Fungi | 0  | 13 | 0  | 0  |
| Fungi | 0  | 13 | 0  | 0  |
| Fungi | 0  | 13 | 0  | 0  |
| Fungi | 0  | 13 | 0  | 0  |
| Fungi | 0  | 13 | 0  | 0  |
| Fungi | 0  | 0  | 0  | 0  |
| Fungi | 0  | 0  | 0  | 0  |
| Fungi | 0  | 0  | 0  | 0  |
| Fungi | 0  | 0  | 0  | 0  |
| Fungi | 0  | 0  | 0  | 0  |
| Fungi | 0  | 0  | 0  | 0  |
| Fungi | 0  | 0  | 0  | 0  |
| Fungi | 0  | 0  | 0  | 0  |
| Fungi | 0  | 0  | 0  | 0  |
| Fungi | 0  | 0  | 0  | 0  |
| Fungi | 0  | 0  | 0  | 0  |
| Fungi | 12 | 0  | 0  | 0  |

|       |    |    |    |   |
|-------|----|----|----|---|
| Fungi | 12 | 0  | 0  | 0 |
| Fungi | 12 | 0  | 0  | 0 |
| Fungi | 12 | 0  | 0  | 0 |
| Fungi | 12 | 0  | 0  | 0 |
| Fungi | 12 | 0  | 0  | 0 |
| Fungi | 12 | 0  | 0  | 0 |
| Fungi | 12 | 0  | 0  | 0 |
| Fungi | 12 | 0  | 0  | 0 |
| Fungi | 12 | 0  | 0  | 0 |
| Fungi | 12 | 0  | 0  | 0 |
| Fungi | 12 | 0  | 0  | 0 |
| Fungi | 12 | 0  | 0  | 0 |
| Fungi | 12 | 0  | 0  | 0 |
| Fungi | 12 | 0  | 0  | 0 |
| Fungi | 12 | 0  | 0  | 0 |
| Fungi | 0  | 12 | 0  | 0 |
| Fungi | 0  | 12 | 0  | 0 |
| Fungi | 0  | 12 | 0  | 0 |
| Fungi | 0  | 12 | 0  | 0 |
| Fungi | 0  | 12 | 0  | 0 |
| Fungi | 0  | 6  | 0  | 0 |
| Fungi | 0  | 0  | 12 | 0 |
| Fungi | 0  | 0  | 0  | 0 |
| Fungi | 0  | 0  | 0  | 0 |
| Fungi | 0  | 0  | 0  | 0 |
| Fungi | 0  | 0  | 0  | 0 |
| Fungi | 0  | 0  | 0  | 0 |
| Fungi | 0  | 0  | 0  | 0 |
| Fungi | 0  | 0  | 0  | 0 |
| Fungi | 0  | 0  | 0  | 0 |
| Fungi | 0  | 0  | 0  | 0 |
| Fungi | 0  | 0  | 0  | 0 |
| Fungi | 0  | 0  | 0  | 0 |
| Fungi | 0  | 0  | 0  | 0 |
| Fungi | 0  | 0  | 0  | 0 |
| Fungi | 0  | 0  | 0  | 0 |
| Fungi | 0  | 0  | 0  | 0 |
| Fungi | 11 | 0  | 0  | 0 |
| Fungi | 11 | 0  | 0  | 0 |
| Fungi | 11 | 0  | 0  | 0 |
| Fungi | 11 | 0  | 0  | 0 |
| Fungi | 11 | 0  | 0  | 0 |
| Fungi | 11 | 0  | 0  | 0 |
| Fungi | 11 | 0  | 0  | 0 |
| Fungi | 11 | 0  | 0  | 0 |
| Fungi | 11 | 0  | 0  | 0 |
| Fungi | 11 | 0  | 0  | 0 |
| Fungi | 11 | 0  | 0  | 0 |
| Fungi | 11 | 0  | 0  | 0 |
| Fungi | 0  | 11 | 0  | 0 |
| Fungi | 0  | 11 | 0  | 0 |
| Fungi | 0  | 11 | 0  | 0 |



|       |   |   |   |   |
|-------|---|---|---|---|
| Fungi | 9 | 0 | 0 | 0 |
| Fungi | 9 | 0 | 0 | 0 |
| Fungi | 9 | 0 | 0 | 0 |
| Fungi | 9 | 0 | 0 | 0 |
| Fungi | 9 | 0 | 0 | 0 |
| Fungi | 9 | 0 | 0 | 0 |
| Fungi | 9 | 0 | 0 | 0 |
| Fungi | 6 | 0 | 3 | 0 |
| Fungi | 0 | 9 | 0 | 0 |
| Fungi | 0 | 9 | 0 | 0 |
| Fungi | 0 | 9 | 0 | 0 |
| Fungi | 0 | 9 | 0 | 0 |
| Fungi | 0 | 3 | 0 | 0 |
| Fungi | 0 | 0 | 9 | 0 |
| Fungi | 0 | 0 | 9 | 0 |
| Fungi | 0 | 0 | 9 | 0 |
| Fungi | 0 | 0 | 9 | 0 |
| Fungi | 0 | 0 | 9 | 0 |
| Fungi | 0 | 0 | 4 | 0 |
| Fungi | 0 | 0 | 0 | 0 |
| Fungi | 0 | 0 | 0 | 0 |
| Fungi | 0 | 0 | 0 | 0 |
| Fungi | 0 | 0 | 0 | 0 |
| Fungi | 0 | 0 | 0 | 0 |
| Fungi | 0 | 0 | 0 | 0 |
| Fungi | 0 | 0 | 0 | 0 |
| Fungi | 0 | 0 | 0 | 0 |
| Fungi | 0 | 0 | 0 | 0 |
| Fungi | 0 | 0 | 0 | 0 |
| Fungi | 0 | 0 | 0 | 0 |
| Fungi | 0 | 0 | 0 | 0 |
| Fungi | 0 | 0 | 0 | 0 |
| Fungi | 0 | 0 | 0 | 0 |
| Fungi | 0 | 0 | 0 | 0 |
| Fungi | 0 | 0 | 0 | 0 |
| Fungi | 8 | 0 | 0 | 0 |
| Fungi | 8 | 0 | 0 | 0 |
| Fungi | 8 | 0 | 0 | 0 |
| Fungi | 8 | 0 | 0 | 0 |
| Fungi | 8 | 0 | 0 | 0 |
| Fungi | 8 | 0 | 0 | 0 |
| Fungi | 8 | 0 | 0 | 0 |
| Fungi | 8 | 0 | 0 | 0 |
| Fungi | 8 | 0 | 0 | 0 |
| Fungi | 8 | 0 | 0 | 0 |
| Fungi | 8 | 0 | 0 | 0 |
| Fungi | 8 | 0 | 0 | 0 |
| Fungi | 0 | 8 | 0 | 0 |
| Fungi | 0 | 8 | 0 | 0 |
| Fungi | 0 | 8 | 0 | 0 |
| Fungi | 0 | 0 | 8 | 0 |
| Fungi | 0 | 0 | 8 | 0 |
| Fungi | 0 | 0 | 2 | 0 |
| Fungi | 0 | 0 | 0 | 0 |

[illegible]

[illegible]



[illegible]

[illegible]

[illegible]

[illegible]

[illegible]

| LD2293 | LD2299 | LD2304 | OH1078 | OH2208 | OH2226 | QP1131 | QP65  | QP971 | SF134 |
|--------|--------|--------|--------|--------|--------|--------|-------|-------|-------|
| 74     | 1088   | 452    | 578    | 328    | 1297   | 408    | 330   | 275   | 92686 |
| 22613  | 8478   | 8962   | 752    | 819    | 4310   | 322    | 2219  | 379   | 460   |
| 18     | 433    | 228    | 24765  | 38401  | 10940  | 243    | 507   | 183   | 107   |
| 35828  | 12365  | 14898  | 424    | 106    | 2347   | 185    | 181   | 116   | 60    |
| 11462  | 13329  | 10226  | 470    | 147    | 984    | 143    | 143   | 140   | 86    |
| 0      | 242    | 110    | 173    | 145    | 291    | 139    | 124   | 128   | 86    |
| 0      | 507    | 285    | 304    | 123    | 583    | 526    | 30010 | 3820  | 82    |
| 0      | 385    | 250    | 214    | 134    | 386    | 247    | 29014 | 218   | 73    |
| 0      | 140    | 473    | 8105   | 20980  | 449    | 169    | 69    | 152   | 55    |
| 9134   | 7359   | 6464   | 142    | 68     | 3890   | 87     | 180   | 68    | 0     |
| 11643  | 5919   | 4775   | 306    | 113    | 913    | 166    | 2385  | 197   | 93    |
| 43     | 74     | 42     | 71     | 47     | 26371  | 74     | 51    | 24    | 24    |
| 0      | 0      | 0      | 0      | 0      | 0      | 0      | 485   | 0     | 0     |
| 24     | 5947   | 4151   | 182    | 64     | 436    | 1005   | 2630  | 2191  | 1817  |
| 0      | 183    | 150    | 7516   | 13815  | 269    | 100    | 68    | 89    | 36    |
| 0      | 293    | 152    | 159    | 90     | 285    | 150    | 20289 | 117   | 54    |
| 0      | 255    | 147    | 349    | 105    | 470    | 110    | 93    | 95    | 53    |
| 0      | 266    | 158    | 156    | 84     | 291    | 137    | 80    | 128   | 11772 |
| 510    | 279    | 255    | 151    | 553    | 344    | 2274   | 99    | 2391  | 1516  |
| 2351   | 2943   | 1996   | 340    | 235    | 1354   | 43     | 208   | 53    | 34    |
| 3217   | 3276   | 2475   | 85     | 41     | 237    | 22     | 35    | 29    | 17    |
| 642    | 260    | 425    | 473    | 247    | 411    | 91     | 1434  | 279   | 54    |
| 531    | 364    | 402    | 1361   | 521    | 3151   | 49     | 208   | 35    | 35    |
| 1428   | 227    | 455    | 160    | 76     | 5936   | 57     | 65    | 46    | 17    |
| 0      | 206    | 121    | 147    | 69     | 194    | 255    | 6600  | 674   | 38    |
| 0      | 3789   | 22     | 175    | 100    | 95     | 974    | 33    | 906   | 0     |
| 0      | 61     | 35     | 1570   | 3966   | 82     | 31     | 25    | 17    | 10    |
| 170    | 258    | 101    | 102    | 57     | 208    | 127    | 905   | 90    | 0     |
| 379    | 265    | 389    | 49     | 0      | 157    | 0      | 56    | 54    | 0     |
| 2193   | 1039   | 733    | 85     | 46     | 174    | 0      | 525   | 0     | 0     |
| 1296   | 1652   | 1399   | 12     | 36     | 105    | 20     | 0     | 33    | 0     |
| 0      | 0      | 0      | 0      | 0      | 0      | 0      | 0     | 0     | 0     |
| 28     | 265    | 190    | 35     | 21     | 421    | 1478   | 92    | 1084  | 8     |
| 2450   | 729    | 866    | 0      | 0      | 271    | 0      | 0     | 0     | 0     |
| 151    | 6      | 5      | 1137   | 498    | 2350   | 0      | 3     | 0     | 0     |
| 1095   | 1424   | 948    | 0      | 0      | 78     | 39     | 0     | 0     | 0     |
| 4      | 19     | 27     | 610    | 872    | 1905   | 24     | 70    | 22    | 0     |
| 0      | 613    | 532    | 319    | 254    | 583    | 258    | 201   | 143   | 692   |
| 815    | 1046   | 1062   | 0      | 0      | 74     | 0      | 0     | 0     | 28    |
| 159    | 93     | 131    | 78     | 32     | 550    | 52     | 345   | 152   | 0     |
| 0      | 10     | 17     | 0      | 0      | 16     | 15     | 0     | 31    | 0     |
| 16     | 45     | 37     | 729    | 1059   | 528    | 46     | 501   | 58    | 0     |
| 848    | 974    | 1040   | 0      | 16     | 94     | 0      | 0     | 0     | 0     |
| 0      | 62     | 33     | 40     | 24     | 73     | 60     | 2231  | 34    | 20    |
| 1087   | 578    | 545    | 0      | 0      | 206    | 46     | 18    | 41    | 34    |
| 3      | 368    | 0      | 123    | 1174   | 323    | 25     | 19    | 14    | 0     |
| 1089   | 491    | 747    | 0      | 0      | 81     | 0      | 119   | 0     | 0     |
| 812    | 361    | 507    | 34     | 0      | 102    | 0      | 31    | 28    | 0     |

|      |      |     |      |     |      |     |      |     |      |
|------|------|-----|------|-----|------|-----|------|-----|------|
| 554  | 915  | 748 | 0    | 27  | 39   | 0   | 38   | 0   | 0    |
| 1056 | 404  | 601 | 33   | 13  | 233  | 23  | 23   | 22  | 0    |
| 325  | 209  | 368 | 236  | 59  | 139  | 37  | 238  | 0   | 31   |
| 368  | 212  | 217 | 249  | 107 | 212  | 0   | 309  | 55  | 0    |
| 697  | 714  | 476 | 55   | 0   | 109  | 0   | 24   | 19  | 0    |
| 0    | 1205 | 0   | 0    | 564 | 0    | 273 | 0    | 249 | 0    |
| 551  | 686  | 865 | 0    | 0   | 55   | 0   | 30   | 0   | 0    |
| 960  | 462  | 658 | 0    | 27  | 112  | 38  | 0    | 0   | 0    |
| 963  | 601  | 540 | 0    | 0   | 0    | 0   | 0    | 0   | 0    |
| 17   | 0    | 17  | 27   | 13  | 1972 | 14  | 9    | 12  | 0    |
| 43   | 41   | 48  | 888  | 927 | 43   | 27  | 18   | 24  | 6    |
| 0    | 13   | 0   | 21   | 0   | 10   | 0   | 5    | 0   | 0    |
| 310  | 181  | 219 | 35   | 25  | 179  | 42  | 374  | 114 | 7    |
| 0    | 34   | 25  | 735  | 827 | 169  | 30  | 12   | 22  | 0    |
| 0    | 0    | 0   | 0    | 0   | 0    | 21  | 0    | 0   | 0    |
| 466  | 842  | 431 | 0    | 0   | 43   | 32  | 0    | 0   | 0    |
| 371  | 609  | 544 | 0    | 22  | 0    | 0   | 0    | 0   | 0    |
| 546  | 463  | 558 | 50   | 22  | 54   | 0   | 0    | 0   | 0    |
| 0    | 13   | 0   | 1585 | 17  | 52   | 15  | 11   | 20  | 0    |
| 0    | 0    | 0   | 0    | 0   | 0    | 0   | 0    | 0   | 1596 |
| 23   | 66   | 58  | 0    | 27  | 97   | 0   | 0    | 0   | 0    |
| 0    | 0    | 0   | 0    | 0   | 0    | 0   | 0    | 0   | 0    |
| 492  | 368  | 335 | 0    | 0   | 0    | 0   | 0    | 0   | 65   |
| 98   | 0    | 46  | 37   | 10  | 137  | 0   | 75   | 24  | 136  |
| 494  | 371  | 441 | 0    | 0   | 40   | 0   | 0    | 0   | 0    |
| 1029 | 86   | 151 | 12   | 6   | 72   | 0   | 6    | 0   | 0    |
| 0    | 45   | 25  | 25   | 17  | 60   | 31  | 648  | 61  | 56   |
| 370  | 418  | 459 | 0    | 0   | 43   | 0   | 0    | 16  | 0    |
| 42   | 9    | 10  | 0    | 0   | 83   | 0   | 0    | 0   | 0    |
| 0    | 0    | 0   | 0    | 0   | 65   | 0   | 647  | 583 | 0    |
| 0    | 0    | 0   | 236  | 621 | 0    | 0   | 398  | 0   | 0    |
| 179  | 141  | 87  | 271  | 190 | 58   | 26  | 0    | 0   | 0    |
| 0    | 14   | 22  | 18   | 13  | 59   | 28  | 628  | 18  | 8    |
| 0    | 0    | 0   | 20   | 0   | 0    | 0   | 0    | 0   | 0    |
| 31   | 121  | 118 | 96   | 47  | 121  | 24  | 67   | 22  | 17   |
| 0    | 0    | 0   | 326  | 178 | 695  | 0   | 0    | 0   | 0    |
| 137  | 71   | 80  | 79   | 124 | 248  | 23  | 36   | 24  | 0    |
| 220  | 456  | 470 | 0    | 0   | 30   | 0   | 0    | 0   | 0    |
| 0    | 0    | 0   | 0    | 0   | 0    | 0   | 0    | 0   | 0    |
| 57   | 11   | 28  | 347  | 103 | 573  | 0   | 0    | 0   | 12   |
| 0    | 0    | 0   | 0    | 67  | 1048 | 13  | 42   | 0   | 22   |
| 0    | 0    | 0   | 0    | 0   | 0    | 0   | 8    | 4   | 0    |
| 0    | 0    | 0   | 0    | 0   | 0    | 0   | 0    | 0   | 0    |
| 0    | 0    | 326 | 311  | 178 | 8    | 42  | 0    | 43  | 16   |
| 372  | 40   | 235 | 0    | 0   | 0    | 0   | 0    | 0   | 0    |
| 400  | 223  | 414 | 0    | 0   | 97   | 0   | 0    | 0   | 0    |
| 112  | 21   | 0   | 36   | 14  | 60   | 21  | 54   | 74  | 0    |
| 0    | 0    | 0   | 0    | 0   | 0    | 0   | 1116 | 0   | 0    |
| 399  | 298  | 200 | 0    | 0   | 72   | 0   | 0    | 0   | 18   |
| 0    | 0    | 35  | 0    | 34  | 0    | 0   | 0    | 0   | 0    |

|     |     |     |     |     |     |     |     |    |     |
|-----|-----|-----|-----|-----|-----|-----|-----|----|-----|
| 0   | 0   | 0   | 0   | 0   | 17  | 0   | 0   | 0  | 0   |
| 0   | 0   | 0   | 0   | 0   | 0   | 0   | 0   | 0  | 0   |
| 694 | 149 | 136 | 0   | 0   | 0   | 0   | 0   | 0  | 0   |
| 440 | 143 | 216 | 0   | 0   | 42  | 0   | 0   | 0  | 0   |
| 0   | 0   | 0   | 0   | 0   | 0   | 0   | 0   | 0  | 0   |
| 0   | 0   | 0   | 0   | 0   | 81  | 0   | 44  | 0  | 0   |
| 0   | 0   | 0   | 8   | 0   | 0   | 0   | 15  | 0  | 0   |
| 230 | 290 | 290 | 0   | 0   | 38  | 0   | 0   | 0  | 0   |
| 0   | 0   | 0   | 21  | 24  | 0   | 0   | 12  | 0  | 0   |
| 243 | 296 | 312 | 0   | 0   | 0   | 0   | 0   | 0  | 0   |
| 0   | 0   | 0   | 0   | 0   | 0   | 0   | 0   | 0  | 0   |
| 0   | 11  | 0   | 12  | 0   | 765 | 11  | 0   | 0  | 0   |
| 0   | 0   | 0   | 0   | 0   | 0   | 0   | 0   | 0  | 0   |
| 0   | 8   | 363 | 28  | 0   | 0   | 194 | 38  | 90 | 13  |
| 0   | 0   | 0   | 0   | 0   | 800 | 0   | 0   | 0  | 0   |
| 555 | 99  | 145 | 0   | 0   | 0   | 0   | 0   | 0  | 0   |
| 257 | 332 | 205 | 0   | 0   | 0   | 0   | 0   | 0  | 0   |
| 272 | 230 | 246 | 0   | 0   | 0   | 0   | 0   | 0  | 0   |
| 311 | 131 | 81  | 44  | 32  | 135 | 0   | 0   | 0  | 0   |
| 64  | 43  | 34  | 87  | 186 | 231 | 70  | 0   | 0  | 0   |
| 0   | 0   | 0   | 393 | 333 | 12  | 0   | 0   | 6  | 0   |
| 198 | 223 | 264 | 0   | 0   | 23  | 0   | 0   | 5  | 0   |
| 0   | 0   | 0   | 0   | 0   | 0   | 0   | 0   | 0  | 0   |
| 292 | 172 | 211 | 0   | 0   | 32  | 0   | 0   | 0  | 0   |
| 3   | 11  | 11  | 197 | 125 | 36  | 5   | 4   | 7  | 16  |
| 0   | 0   | 0   | 0   | 0   | 0   | 0   | 0   | 0  | 0   |
| 0   | 4   | 10  | 164 | 472 | 12  | 4   | 6   | 4  | 5   |
| 32  | 12  | 0   | 200 | 93  | 320 | 0   | 0   | 0  | 0   |
| 0   | 0   | 0   | 49  | 44  | 0   | 0   | 0   | 0  | 477 |
| 0   | 155 | 0   | 112 | 105 | 38  | 0   | 0   | 0  | 26  |
| 0   | 0   | 0   | 0   | 0   | 0   | 0   | 0   | 0  | 0   |
| 0   | 0   | 6   | 5   | 0   | 256 | 0   | 0   | 0  | 14  |
| 0   | 0   | 0   | 156 | 466 | 0   | 0   | 0   | 0  | 0   |
| 178 | 50  | 246 | 12  | 0   | 42  | 0   | 0   | 11 | 7   |
| 0   | 2   | 0   | 639 | 0   | 0   | 0   | 0   | 0  | 0   |
| 0   | 44  | 96  | 91  | 0   | 48  | 21  | 0   | 27 | 5   |
| 121 | 55  | 47  | 0   | 0   | 11  | 0   | 0   | 0  | 0   |
| 10  | 6   | 0   | 123 | 400 | 22  | 0   | 0   | 6  | 0   |
| 0   | 0   | 11  | 0   | 0   | 593 | 0   | 0   | 0  | 0   |
| 0   | 119 | 133 | 88  | 0   | 169 | 90  | 0   | 0  | 0   |
| 41  | 66  | 48  | 78  | 0   | 82  | 0   | 186 | 22 | 0   |
| 0   | 20  | 0   | 12  | 13  | 99  | 0   | 22  | 0  | 5   |
| 219 | 153 | 166 | 0   | 0   | 39  | 0   | 0   | 0  | 0   |
| 0   | 0   | 0   | 0   | 0   | 0   | 0   | 0   | 0  | 0   |
| 110 | 168 | 245 | 0   | 0   | 12  | 0   | 7   | 0  | 0   |
| 84  | 36  | 51  | 0   | 11  | 21  | 8   | 34  | 10 | 8   |
| 171 | 139 | 221 | 0   | 0   | 25  | 0   | 0   | 0  | 0   |
| 100 | 77  | 156 | 0   | 12  | 28  | 19  | 32  | 0  | 0   |
| 0   | 0   | 0   | 0   | 0   | 0   | 0   | 0   | 0  | 0   |
| 0   | 0   | 36  | 0   | 0   | 56  | 0   | 0   | 0  | 0   |



|     |     |     |     |     |     |    |     |     |     |
|-----|-----|-----|-----|-----|-----|----|-----|-----|-----|
| 0   | 24  | 0   | 0   | 0   | 0   | 0  | 0   | 0   | 0   |
| 0   | 182 | 151 | 32  | 10  | 37  | 9  | 22  | 14  | 0   |
| 0   | 0   | 0   | 0   | 0   | 0   | 0  | 0   | 0   | 0   |
| 0   | 0   | 41  | 0   | 0   | 0   | 0  | 0   | 0   | 0   |
| 266 | 112 | 161 | 0   | 0   | 0   | 0  | 0   | 0   | 0   |
| 45  | 8   | 0   | 0   | 0   | 26  | 0  | 0   | 0   | 0   |
| 0   | 0   | 0   | 43  | 125 | 0   | 0  | 12  | 0   | 0   |
| 215 | 135 | 167 | 0   | 0   | 0   | 0  | 0   | 0   | 0   |
| 0   | 0   | 0   | 7   | 119 | 0   | 0  | 0   | 0   | 0   |
| 0   | 95  | 122 | 34  | 11  | 144 | 0  | 17  | 0   | 4   |
| 0   | 0   | 0   | 0   | 0   | 0   | 0  | 0   | 0   | 0   |
| 140 | 172 | 178 | 0   | 0   | 0   | 0  | 0   | 0   | 0   |
| 0   | 7   | 6   | 292 | 111 | 28  | 3  | 0   | 9   | 5   |
| 5   | 0   | 8   | 8   | 6   | 421 | 7  | 6   | 8   | 0   |
| 0   | 0   | 0   | 44  | 0   | 0   | 0  | 0   | 0   | 0   |
| 0   | 0   | 0   | 0   | 0   | 0   | 0  | 0   | 0   | 0   |
| 0   | 0   | 0   | 0   | 0   | 473 | 0  | 0   | 0   | 0   |
| 93  | 0   | 0   | 0   | 0   | 181 | 0  | 0   | 59  | 0   |
| 0   | 0   | 0   | 0   | 0   | 0   | 0  | 0   | 463 | 0   |
| 142 | 148 | 151 | 0   | 0   | 14  | 0  | 0   | 0   | 0   |
| 0   | 267 | 180 | 0   | 0   | 0   | 0  | 0   | 0   | 0   |
| 0   | 9   | 0   | 0   | 89  | 25  | 0  | 0   | 4   | 0   |
| 0   | 0   | 0   | 0   | 0   | 0   | 0  | 446 | 0   | 0   |
| 0   | 0   | 0   | 0   | 0   | 0   | 0  | 0   | 0   | 0   |
| 0   | 5   | 0   | 227 | 52  | 160 | 0  | 0   | 0   | 0   |
| 0   | 0   | 0   | 0   | 0   | 0   | 0  | 0   | 443 | 0   |
| 0   | 0   | 37  | 0   | 0   | 111 | 0  | 0   | 0   | 0   |
| 324 | 0   | 57  | 0   | 0   | 57  | 0  | 0   | 0   | 0   |
| 73  | 92  | 194 | 0   | 0   | 46  | 12 | 0   | 0   | 0   |
| 14  | 0   | 27  | 64  | 178 | 32  | 0  | 0   | 0   | 0   |
| 0   | 10  | 0   | 0   | 0   | 0   | 0  | 421 | 0   | 0   |
| 0   | 0   | 0   | 0   | 0   | 0   | 0  | 0   | 0   | 0   |
| 0   | 20  | 18  | 27  | 0   | 40  | 0  | 0   | 17  | 220 |
| 0   | 0   | 0   | 0   | 0   | 0   | 0  | 0   | 0   | 0   |
| 0   | 7   | 0   | 0   | 0   | 159 | 0  | 66  | 0   | 0   |
| 0   | 0   | 0   | 137 | 0   | 279 | 0  | 0   | 0   | 0   |
| 153 | 76  | 0   | 0   | 0   | 0   | 0  | 57  | 0   | 0   |
| 3   | 0   | 0   | 0   | 0   | 34  | 0  | 0   | 0   | 0   |
| 0   | 0   | 17  | 0   | 0   | 0   | 0  | 0   | 0   | 3   |
| 0   | 0   | 0   | 0   | 0   | 0   | 0  | 0   | 0   | 0   |
| 115 | 132 | 149 | 0   | 0   | 0   | 0  | 0   | 0   | 0   |
| 0   | 0   | 13  | 0   | 0   | 38  | 0  | 0   | 0   | 0   |
| 0   | 14  | 6   | 0   | 8   | 19  | 6  | 0   | 4   | 6   |
| 0   | 0   | 0   | 0   | 0   | 0   | 0  | 0   | 0   | 0   |
| 0   | 0   | 0   | 0   | 0   | 0   | 0  | 0   | 0   | 0   |
| 298 | 35  | 29  | 0   | 0   | 13  | 0  | 0   | 0   | 0   |
| 0   | 0   | 0   | 0   | 0   | 0   | 0  | 0   | 0   | 0   |
| 0   | 0   | 365 | 0   | 0   | 0   | 0  | 0   | 0   | 0   |
| 0   | 0   | 0   | 124 | 236 | 0   | 0  | 0   | 0   | 0   |
| 0   | 0   | 0   | 38  | 254 | 55  | 4  | 0   | 0   | 0   |

|     |     |     |     |     |     |     |     |     |     |
|-----|-----|-----|-----|-----|-----|-----|-----|-----|-----|
| 0   | 0   | 0   | 0   | 0   | 32  | 0   | 0   | 0   | 0   |
| 135 | 99  | 72  | 0   | 0   | 0   | 0   | 0   | 0   | 0   |
| 14  | 9   | 13  | 0   | 0   | 0   | 0   | 0   | 0   | 0   |
| 69  | 35  | 19  | 55  | 0   | 35  | 0   | 11  | 0   | 0   |
| 0   | 0   | 0   | 0   | 0   | 0   | 0   | 41  | 305 | 0   |
| 37  | 11  | 17  | 0   | 30  | 44  | 0   | 15  | 0   | 0   |
| 6   | 52  | 0   | 69  | 31  | 150 | 0   | 0   | 0   | 0   |
| 0   | 0   | 0   | 0   | 0   | 0   | 0   | 0   | 0   | 0   |
| 73  | 262 | 0   | 0   | 0   | 0   | 0   | 0   | 0   | 0   |
| 0   | 0   | 0   | 205 | 0   | 0   | 0   | 0   | 0   | 0   |
| 0   | 0   | 0   | 0   | 0   | 0   | 167 | 40  | 126 | 0   |
| 0   | 0   | 0   | 0   | 0   | 0   | 0   | 330 | 0   | 0   |
| 150 | 124 | 29  | 9   | 0   | 15  | 0   | 0   | 0   | 0   |
| 0   | 0   | 0   | 0   | 0   | 0   | 0   | 0   | 0   | 299 |
| 0   | 0   | 0   | 0   | 0   | 0   | 0   | 0   | 0   | 0   |
| 195 | 0   | 0   | 0   | 0   | 98  | 0   | 0   | 0   | 0   |
| 0   | 0   | 25  | 98  | 147 | 0   | 0   | 0   | 0   | 0   |
| 0   | 0   | 0   | 97  | 44  | 176 | 0   | 0   | 0   | 0   |
| 0   | 0   | 0   | 0   | 0   | 0   | 0   | 0   | 0   | 0   |
| 4   | 0   | 0   | 0   | 0   | 10  | 0   | 0   | 0   | 0   |
| 0   | 0   | 0   | 158 | 147 | 0   | 0   | 0   | 0   | 0   |
| 0   | 0   | 0   | 0   | 0   | 0   | 0   | 0   | 0   | 103 |
| 0   | 0   | 0   | 0   | 0   | 0   | 0   | 0   | 0   | 0   |
| 0   | 0   | 0   | 0   | 0   | 0   | 0   | 0   | 0   | 0   |
| 0   | 0   | 0   | 0   | 0   | 0   | 0   | 0   | 0   | 0   |
| 0   | 0   | 0   | 0   | 0   | 0   | 0   | 0   | 0   | 0   |
| 86  | 0   | 209 | 0   | 0   | 0   | 0   | 0   | 0   | 0   |
| 0   | 0   | 294 | 0   | 0   | 0   | 0   | 0   | 0   | 0   |
| 0   | 0   | 0   | 0   | 0   | 0   | 0   | 0   | 0   | 0   |
| 0   | 0   | 0   | 0   | 0   | 0   | 0   | 0   | 0   | 0   |
| 0   | 0   | 0   | 107 | 155 | 0   | 0   | 0   | 0   | 0   |
| 158 | 0   | 125 | 0   | 0   | 0   | 0   | 0   | 0   | 0   |
| 0   | 0   | 0   | 0   | 27  | 0   | 0   | 0   | 0   | 0   |
| 0   | 0   | 0   | 0   | 276 | 0   | 0   | 0   | 0   | 0   |
| 0   | 0   | 0   | 0   | 0   | 0   | 0   | 0   | 0   | 0   |
| 0   | 0   | 0   | 0   | 0   | 0   | 0   | 0   | 0   | 0   |
| 0   | 0   | 0   | 35  | 16  | 34  | 0   | 8   | 0   | 0   |
| 11  | 29  | 14  | 125 | 26  | 34  | 2   | 4   | 0   | 0   |
| 0   | 0   | 0   | 0   | 0   | 0   | 0   | 0   | 0   | 0   |
| 0   | 0   | 0   | 0   | 0   | 0   | 0   | 0   | 258 | 0   |
| 81  | 0   | 57  | 0   | 0   | 0   | 0   | 42  | 0   | 0   |
| 0   | 0   | 0   | 0   | 0   | 0   | 201 | 52  | 0   | 0   |
| 16  | 0   | 0   | 24  | 39  | 5   | 0   | 0   | 0   | 0   |
| 0   | 0   | 0   | 0   | 0   | 0   | 0   | 0   | 0   | 0   |
| 0   | 0   | 0   | 0   | 0   | 0   | 0   | 0   | 0   | 0   |
| 0   | 180 | 66  | 0   | 0   | 0   | 0   | 0   | 0   | 0   |
| 0   | 9   | 7   | 4   | 5   | 10  | 12  | 167 | 12  | 0   |
| 0   | 0   | 0   | 232 | 11  | 0   | 0   | 0   | 0   | 0   |
| 0   | 0   | 0   | 0   | 230 | 0   | 0   | 13  | 0   | 0   |

[illegible]

[illegible]

|     |    |    |    |    |     |    |     |     |    |
|-----|----|----|----|----|-----|----|-----|-----|----|
| 0   | 0  | 0  | 9  | 0  | 13  | 0  | 0   | 0   | 0  |
| 45  | 0  | 54 | 3  | 0  | 5   | 2  | 0   | 0   | 0  |
| 101 | 0  | 0  | 0  | 0  | 12  | 0  | 0   | 0   | 0  |
| 57  | 0  | 55 | 0  | 0  | 0   | 0  | 0   | 0   | 0  |
| 0   | 0  | 6  | 0  | 38 | 0   | 0  | 0   | 0   | 0  |
| 45  | 65 | 0  | 0  | 0  | 0   | 0  | 0   | 0   | 0  |
| 0   | 67 | 43 | 0  | 0  | 0   | 0  | 0   | 0   | 0  |
| 0   | 12 | 0  | 22 | 0  | 0   | 0  | 57  | 0   | 0  |
| 10  | 26 | 0  | 0  | 0  | 63  | 0  | 0   | 0   | 0  |
| 0   | 0  | 0  | 0  | 0  | 0   | 0  | 0   | 0   | 0  |
| 0   | 0  | 0  | 89 | 0  | 15  | 0  | 0   | 0   | 0  |
| 0   | 0  | 0  | 0  | 0  | 0   | 0  | 108 | 0   | 0  |
| 0   | 0  | 18 | 0  | 0  | 0   | 0  | 0   | 0   | 0  |
| 0   | 0  | 0  | 0  | 0  | 9   | 0  | 0   | 0   | 0  |
| 0   | 0  | 0  | 0  | 0  | 0   | 0  | 0   | 0   | 0  |
| 0   | 0  | 6  | 3  | 57 | 0   | 6  | 0   | 10  | 13 |
| 0   | 0  | 0  | 0  | 0  | 107 | 0  | 0   | 0   | 0  |
| 0   | 0  | 0  | 0  | 0  | 0   | 0  | 0   | 0   | 0  |
| 16  | 30 | 0  | 0  | 0  | 0   | 31 | 0   | 27  | 0  |
| 53  | 0  | 50 | 0  | 0  | 0   | 0  | 0   | 0   | 0  |
| 0   | 49 | 37 | 0  | 0  | 0   | 5  | 7   | 0   | 0  |
| 0   | 0  | 0  | 0  | 0  | 0   | 0  | 0   | 0   | 0  |
| 0   | 0  | 0  | 0  | 0  | 0   | 0  | 0   | 102 | 0  |
| 0   | 0  | 0  | 0  | 0  | 0   | 0  | 0   | 0   | 0  |
| 13  | 0  | 0  | 0  | 0  | 17  | 0  | 0   | 0   | 0  |
| 0   | 9  | 0  | 84 | 0  | 7   | 0  | 0   | 0   | 0  |
| 0   | 0  | 0  | 0  | 0  | 0   | 0  | 0   | 0   | 0  |
| 0   | 0  | 0  | 0  | 0  | 0   | 0  | 0   | 0   | 0  |
| 0   | 0  | 0  | 59 | 40 | 0   | 0  | 0   | 0   | 0  |
| 0   | 19 | 0  | 39 | 0  | 0   | 0  | 0   | 0   | 0  |
| 0   | 3  | 4  | 51 | 35 | 2   | 0  | 3   | 0   | 0  |
| 0   | 0  | 98 | 0  | 0  | 0   | 0  | 0   | 0   | 0  |
| 0   | 0  | 0  | 0  | 0  | 0   | 0  | 0   | 0   | 0  |
| 12  | 0  | 0  | 0  | 0  | 0   | 0  | 0   | 0   | 0  |
| 0   | 0  | 0  | 0  | 0  | 0   | 0  | 0   | 0   | 0  |
| 19  | 77 | 0  | 0  | 0  | 0   | 0  | 0   | 0   | 0  |
| 28  | 34 | 33 | 0  | 0  | 0   | 0  | 0   | 0   | 0  |
| 0   | 0  | 0  | 0  | 39 | 56  | 0  | 0   | 0   | 0  |
| 0   | 0  | 0  | 56 | 0  | 38  | 0  | 0   | 0   | 0  |
| 28  | 65 | 0  | 0  | 0  | 0   | 0  | 0   | 0   | 0  |
| 0   | 0  | 0  | 0  | 0  | 0   | 0  | 0   | 0   | 0  |
| 0   | 0  | 0  | 0  | 0  | 25  | 0  | 0   | 0   | 0  |
| 0   | 0  | 0  | 0  | 0  | 0   | 0  | 0   | 0   | 0  |
| 0   | 0  | 0  | 0  | 0  | 0   | 0  | 91  | 0   | 0  |
| 0   | 0  | 0  | 0  | 0  | 0   | 0  | 0   | 91  | 0  |
| 0   | 0  | 0  | 0  | 0  | 0   | 0  | 0   | 0   | 0  |
| 0   | 0  | 0  | 0  | 0  | 0   | 0  | 0   | 0   | 0  |
| 0   | 0  | 0  | 0  | 0  | 0   | 0  | 0   | 0   | 0  |
| 4   | 0  | 0  | 0  | 0  | 80  | 0  | 0   | 0   | 0  |
| 0   | 0  | 0  | 0  | 0  | 6   | 0  | 0   | 0   | 0  |









|    |    |    |    |    |    |   |    |   |   |
|----|----|----|----|----|----|---|----|---|---|
| 0  | 0  | 0  | 8  | 0  | 0  | 0 | 0  | 0 | 0 |
| 0  | 0  | 0  | 0  | 9  | 39 | 0 | 0  | 0 | 0 |
| 0  | 0  | 0  | 0  | 0  | 0  | 0 | 0  | 0 | 0 |
| 0  | 0  | 0  | 0  | 0  | 0  | 0 | 0  | 0 | 0 |
| 0  | 0  | 0  | 0  | 0  | 0  | 0 | 0  | 0 | 0 |
| 18 | 20 | 9  | 0  | 0  | 0  | 0 | 0  | 0 | 0 |
| 0  | 25 | 20 | 0  | 0  | 0  | 2 | 0  | 0 | 0 |
| 0  | 0  | 38 | 0  | 0  | 9  | 0 | 0  | 0 | 0 |
| 0  | 0  | 0  | 41 | 0  | 2  | 0 | 0  | 4 | 0 |
| 0  | 0  | 0  | 0  | 47 | 0  | 0 | 0  | 0 | 0 |
| 0  | 0  | 0  | 0  | 0  | 0  | 0 | 47 | 0 | 0 |
| 0  | 0  | 0  | 0  | 0  | 0  | 0 | 0  | 0 | 0 |
| 0  | 0  | 46 | 0  | 0  | 0  | 0 | 0  | 0 | 0 |
| 0  | 0  | 46 | 0  | 0  | 0  | 0 | 0  | 0 | 0 |
| 0  | 0  | 0  | 0  | 43 | 0  | 0 | 0  | 3 | 0 |
| 0  | 0  | 0  | 0  | 0  | 0  | 0 | 46 | 0 | 0 |
| 0  | 0  | 0  | 0  | 0  | 0  | 0 | 0  | 0 | 0 |
| 0  | 0  | 0  | 0  | 0  | 0  | 0 | 0  | 0 | 0 |
| 15 | 0  | 0  | 0  | 0  | 0  | 0 | 0  | 0 | 0 |
| 45 | 0  | 0  | 0  | 0  | 0  | 0 | 0  | 0 | 0 |
| 20 | 10 | 10 | 0  | 0  | 5  | 0 | 0  | 0 | 0 |
| 0  | 0  | 0  | 0  | 45 | 0  | 0 | 0  | 0 | 0 |
| 0  | 0  | 0  | 0  | 0  | 45 | 0 | 0  | 0 | 0 |
| 0  | 0  | 0  | 0  | 0  | 43 | 2 | 0  | 0 | 0 |
| 0  | 0  | 36 | 0  | 2  | 0  | 0 | 0  | 0 | 0 |
| 0  | 0  | 0  | 0  | 0  | 0  | 0 | 0  | 0 | 0 |
| 44 | 0  | 0  | 0  | 0  | 0  | 0 | 0  | 0 | 0 |
| 0  | 44 | 0  | 0  | 0  | 0  | 0 | 0  | 0 | 0 |
| 0  | 0  | 6  | 0  | 0  | 0  | 0 | 0  | 0 | 7 |
| 0  | 0  | 0  | 0  | 0  | 0  | 0 | 41 | 3 | 0 |
| 0  | 0  | 0  | 0  | 0  | 0  | 0 | 0  | 0 | 0 |
| 0  | 0  | 0  | 0  | 0  | 0  | 0 | 0  | 0 | 0 |
| 0  | 0  | 0  | 0  | 0  | 0  | 0 | 0  | 0 | 0 |
| 0  | 0  | 0  | 0  | 0  | 0  | 0 | 0  | 0 | 0 |
| 0  | 0  | 0  | 0  | 0  | 0  | 0 | 0  | 0 | 0 |
| 0  | 0  | 0  | 43 | 0  | 0  | 0 | 0  | 0 | 0 |
| 0  | 0  | 0  | 0  | 43 | 0  | 0 | 0  | 0 | 0 |
| 0  | 0  | 0  | 0  | 0  | 0  | 0 | 0  | 0 | 0 |
| 0  | 42 | 0  | 0  | 0  | 0  | 0 | 0  | 0 | 0 |
| 0  | 0  | 0  | 16 | 0  | 0  | 0 | 0  | 0 | 0 |
| 0  | 0  | 0  | 0  | 0  | 0  | 0 | 0  | 0 | 0 |
| 0  | 0  | 0  | 38 | 0  | 0  | 0 | 0  | 3 | 0 |
| 40 | 0  | 0  | 0  | 0  | 0  | 0 | 0  | 0 | 0 |
| 25 | 0  | 0  | 0  | 0  | 15 | 0 | 0  | 0 | 0 |
| 15 | 17 | 0  | 0  | 0  | 8  | 0 | 0  | 0 | 0 |
| 3  | 0  | 0  | 12 | 5  | 20 | 0 | 0  | 0 | 0 |
| 0  | 0  | 0  | 33 | 0  | 7  | 0 | 0  | 0 | 0 |
| 0  | 0  | 0  | 0  | 0  | 40 | 0 | 0  | 0 | 0 |
| 0  | 0  | 0  | 0  | 0  | 0  | 0 | 0  | 0 | 0 |
| 5  | 0  | 8  | 17 | 0  | 0  | 0 | 0  | 0 | 0 |

|    |    |    |    |    |    |   |    |    |   |
|----|----|----|----|----|----|---|----|----|---|
| 0  | 0  | 0  | 0  | 0  | 0  | 0 | 0  | 0  | 0 |
| 39 | 0  | 0  | 0  | 0  | 0  | 0 | 0  | 0  | 0 |
| 0  | 0  | 0  | 39 | 0  | 0  | 0 | 0  | 0  | 0 |
| 0  | 0  | 0  | 39 | 0  | 0  | 0 | 0  | 0  | 0 |
| 0  | 0  | 0  | 36 | 0  | 0  | 0 | 0  | 0  | 0 |
| 0  | 0  | 0  | 0  | 39 | 0  | 0 | 0  | 0  | 0 |
| 0  | 0  | 0  | 0  | 0  | 39 | 0 | 0  | 0  | 0 |
| 0  | 0  | 0  | 0  | 0  | 0  | 0 | 0  | 39 | 0 |
| 0  | 0  | 0  | 0  | 0  | 0  | 0 | 0  | 0  | 0 |
| 0  | 5  | 0  | 21 | 0  | 0  | 0 | 0  | 0  | 0 |
| 0  | 0  | 0  | 0  | 0  | 0  | 0 | 0  | 0  | 0 |
| 38 | 0  | 0  | 0  | 0  | 0  | 0 | 0  | 0  | 0 |
| 0  | 23 | 15 | 0  | 0  | 0  | 0 | 0  | 0  | 0 |
| 0  | 0  | 0  | 38 | 0  | 0  | 0 | 0  | 0  | 0 |
| 0  | 0  | 0  | 38 | 0  | 0  | 0 | 0  | 0  | 0 |
| 0  | 0  | 0  | 38 | 0  | 0  | 0 | 0  | 0  | 0 |
| 0  | 0  | 0  | 0  | 0  | 0  | 0 | 38 | 0  | 0 |
| 0  | 0  | 0  | 0  | 0  | 0  | 0 | 0  | 38 | 0 |
| 0  | 0  | 0  | 0  | 0  | 0  | 0 | 0  | 0  | 0 |
| 0  | 0  | 0  | 0  | 0  | 0  | 0 | 0  | 0  | 0 |
| 0  | 0  | 12 | 0  | 0  | 0  | 0 | 0  | 0  | 0 |
| 0  | 0  | 0  | 0  | 0  | 0  | 0 | 0  | 0  | 0 |
| 14 | 0  | 0  | 0  | 0  | 0  | 0 | 0  | 0  | 0 |
| 0  | 0  | 17 | 0  | 0  | 6  | 0 | 0  | 0  | 0 |
| 0  | 0  | 0  | 0  | 0  | 3  | 0 | 3  | 0  | 0 |
| 26 | 0  | 11 | 0  | 0  | 0  | 0 | 0  | 0  | 0 |
| 0  | 37 | 0  | 0  | 0  | 0  | 0 | 0  | 0  | 0 |
| 0  | 15 | 22 | 0  | 0  | 0  | 0 | 0  | 0  | 0 |
| 0  | 0  | 37 | 0  | 0  | 0  | 0 | 0  | 0  | 0 |
| 0  | 0  | 0  | 0  | 0  | 37 | 0 | 0  | 0  | 0 |
| 0  | 0  | 0  | 0  | 0  | 0  | 0 | 0  | 0  | 0 |
| 0  | 0  | 0  | 0  | 0  | 0  | 0 | 0  | 0  | 0 |
| 0  | 10 | 0  | 7  | 5  | 0  | 0 | 0  | 0  | 0 |
| 0  | 0  | 0  | 36 | 0  | 0  | 0 | 0  | 0  | 0 |
| 0  | 0  | 0  | 36 | 0  | 0  | 0 | 0  | 0  | 0 |
| 0  | 0  | 0  | 0  | 0  | 36 | 0 | 0  | 0  | 0 |
| 0  | 0  | 0  | 0  | 0  | 36 | 0 | 0  | 0  | 0 |
| 0  | 0  | 0  | 0  | 0  | 0  | 0 | 0  | 0  | 0 |
| 0  | 0  | 0  | 0  | 0  | 0  | 0 | 0  | 0  | 0 |
| 0  | 0  | 6  | 0  | 0  | 0  | 0 | 0  | 0  | 0 |
| 0  | 0  | 0  | 0  | 0  | 0  | 0 | 0  | 0  | 0 |
| 0  | 0  | 0  | 0  | 0  | 0  | 0 | 0  | 0  | 0 |
| 16 | 19 | 0  | 0  | 0  | 0  | 0 | 0  | 0  | 0 |
| 0  | 0  | 35 | 0  | 0  | 0  | 0 | 0  | 0  | 0 |
| 0  | 0  | 0  | 35 | 0  | 0  | 0 | 0  | 0  | 0 |
| 0  | 0  | 0  | 0  | 0  | 0  | 0 | 0  | 0  | 0 |
| 0  | 0  | 0  | 0  | 0  | 0  | 0 | 0  | 0  | 0 |
| 0  | 0  | 0  | 0  | 0  | 0  | 0 | 0  | 0  | 0 |
| 0  | 15 | 19 | 0  | 0  | 0  | 0 | 0  | 0  | 0 |
| 0  | 0  | 0  | 0  | 0  | 34 | 0 | 0  | 0  | 0 |

[illegible]

|    |    |    |    |    |    |   |    |   |    |
|----|----|----|----|----|----|---|----|---|----|
| 0  | 0  | 0  | 0  | 0  | 0  | 0 | 0  | 0 | 0  |
| 17 | 0  | 11 | 0  | 0  | 0  | 0 | 0  | 0 | 0  |
| 14 | 7  | 0  | 0  | 0  | 7  | 0 | 0  | 0 | 0  |
| 0  | 24 | 4  | 0  | 0  | 0  | 0 | 0  | 0 | 0  |
| 0  | 0  | 28 | 0  | 0  | 0  | 0 | 0  | 0 | 0  |
| 0  | 0  | 0  | 28 | 0  | 0  | 0 | 0  | 0 | 0  |
| 0  | 0  | 0  | 0  | 28 | 0  | 0 | 0  | 0 | 0  |
| 0  | 0  | 0  | 0  | 0  | 24 | 0 | 0  | 0 | 0  |
| 0  | 0  | 0  | 0  | 0  | 0  | 0 | 0  | 0 | 0  |
| 0  | 0  | 0  | 0  | 0  | 0  | 0 | 0  | 0 | 0  |
| 0  | 0  | 0  | 0  | 0  | 0  | 0 | 0  | 0 | 0  |
| 0  | 0  | 0  | 2  | 0  | 0  | 0 | 0  | 0 | 0  |
| 0  | 0  | 0  | 0  | 0  | 0  | 0 | 0  | 0 | 0  |
| 0  | 0  | 0  | 0  | 0  | 0  | 0 | 0  | 0 | 0  |
| 4  | 0  | 16 | 0  | 0  | 7  | 0 | 0  | 0 | 0  |
| 0  | 27 | 0  | 0  | 0  | 0  | 0 | 0  | 0 | 0  |
| 0  | 0  | 27 | 0  | 0  | 0  | 0 | 0  | 0 | 0  |
| 0  | 0  | 0  | 27 | 0  | 0  | 0 | 0  | 0 | 0  |
| 0  | 0  | 0  | 27 | 0  | 0  | 0 | 0  | 0 | 0  |
| 0  | 0  | 0  | 12 | 0  | 15 | 0 | 0  | 0 | 0  |
| 0  | 0  | 0  | 0  | 0  | 0  | 0 | 27 | 0 | 0  |
| 0  | 0  | 0  | 0  | 0  | 0  | 0 | 0  | 0 | 12 |
| 0  | 0  | 0  | 0  | 0  | 0  | 0 | 0  | 0 | 0  |
| 0  | 0  | 0  | 0  | 0  | 0  | 0 | 0  | 0 | 0  |
| 0  | 0  | 0  | 0  | 0  | 0  | 0 | 0  | 0 | 0  |
| 0  | 0  | 0  | 0  | 0  | 0  | 0 | 0  | 0 | 0  |
| 0  | 0  | 0  | 0  | 0  | 0  | 0 | 0  | 0 | 0  |
| 0  | 0  | 0  | 0  | 0  | 0  | 0 | 0  | 0 | 0  |
| 0  | 26 | 0  | 0  | 0  | 0  | 0 | 0  | 0 | 0  |
| 0  | 26 | 0  | 0  | 0  | 0  | 0 | 0  | 0 | 0  |
| 0  | 26 | 0  | 0  | 0  | 0  | 0 | 0  | 0 | 0  |
| 0  | 0  | 0  | 26 | 0  | 0  | 0 | 0  | 0 | 0  |
| 0  | 0  | 0  | 26 | 0  | 0  | 0 | 0  | 0 | 0  |
| 0  | 0  | 0  | 7  | 19 | 0  | 0 | 0  | 0 | 0  |
| 0  | 0  | 0  | 0  | 0  | 26 | 0 | 0  | 0 | 0  |
| 0  | 0  | 0  | 0  | 0  | 26 | 0 | 0  | 0 | 0  |
| 0  | 0  | 0  | 0  | 0  | 26 | 0 | 0  | 0 | 0  |
| 0  | 0  | 0  | 0  | 0  | 0  | 0 | 26 | 0 | 0  |
| 0  | 0  | 0  | 0  | 0  | 0  | 0 | 0  | 0 | 0  |
| 0  | 0  | 0  | 0  | 0  | 0  | 0 | 0  | 0 | 0  |
| 0  | 0  | 0  | 0  | 0  | 0  | 0 | 0  | 0 | 0  |
| 0  | 0  | 0  | 0  | 0  | 0  | 0 | 0  | 0 | 0  |
| 0  | 0  | 0  | 0  | 0  | 0  | 0 | 0  | 0 | 0  |
| 0  | 0  | 0  | 0  | 0  | 0  | 0 | 0  | 0 | 0  |
| 8  | 0  | 0  | 0  | 6  | 0  | 0 | 0  | 0 | 0  |
| 14 | 0  | 0  | 0  | 0  | 0  | 0 | 11 | 0 | 0  |
| 0  | 25 | 0  | 0  | 0  | 0  | 0 | 0  | 0 | 0  |
| 0  | 25 | 0  | 0  | 0  | 0  | 0 | 0  | 0 | 0  |
| 0  | 0  | 0  | 25 | 0  | 0  | 0 | 0  | 0 | 0  |
| 0  | 0  | 0  | 25 | 0  | 0  | 0 | 0  | 0 | 0  |
| 0  | 0  | 0  | 0  | 25 | 0  | 0 | 0  | 0 | 0  |











[illegible]

|    |    |    |    |    |    |   |    |   |    |
|----|----|----|----|----|----|---|----|---|----|
| 0  | 0  | 0  | 0  | 0  | 0  | 0 | 0  | 0 | 0  |
| 0  | 0  | 0  | 0  | 0  | 0  | 0 | 0  | 0 | 0  |
| 0  | 0  | 0  | 0  | 0  | 0  | 0 | 0  | 0 | 0  |
| 0  | 0  | 0  | 0  | 0  | 0  | 0 | 0  | 0 | 0  |
| 0  | 0  | 0  | 0  | 0  | 0  | 0 | 0  | 0 | 0  |
| 0  | 0  | 0  | 0  | 0  | 0  | 0 | 0  | 0 | 0  |
| 0  | 0  | 0  | 0  | 0  | 0  | 0 | 0  | 0 | 0  |
| 0  | 0  | 0  | 0  | 0  | 0  | 0 | 0  | 0 | 0  |
| 0  | 0  | 0  | 0  | 0  | 0  | 0 | 0  | 0 | 0  |
| 0  | 0  | 0  | 0  | 0  | 0  | 0 | 0  | 0 | 0  |
| 0  | 0  | 0  | 0  | 9  | 0  | 0 | 0  | 0 | 0  |
| 0  | 0  | 0  | 0  | 0  | 0  | 0 | 0  | 0 | 0  |
| 13 | 0  | 0  | 0  | 0  | 0  | 0 | 0  | 0 | 0  |
| 0  | 13 | 0  | 0  | 0  | 0  | 0 | 0  | 0 | 0  |
| 0  | 0  | 13 | 0  | 0  | 0  | 0 | 0  | 0 | 0  |
| 0  | 0  | 0  | 13 | 0  | 0  | 0 | 0  | 0 | 0  |
| 0  | 0  | 0  | 13 | 0  | 0  | 0 | 0  | 0 | 0  |
| 0  | 0  | 0  | 13 | 0  | 0  | 0 | 0  | 0 | 0  |
| 0  | 0  | 0  | 11 | 0  | 2  | 0 | 0  | 0 | 0  |
| 0  | 0  | 0  | 0  | 13 | 0  | 0 | 0  | 0 | 0  |
| 0  | 0  | 0  | 0  | 0  | 13 | 0 | 0  | 0 | 0  |
| 0  | 0  | 0  | 0  | 0  | 13 | 0 | 0  | 0 | 0  |
| 0  | 0  | 0  | 0  | 0  | 13 | 0 | 0  | 0 | 0  |
| 0  | 0  | 0  | 0  | 0  | 13 | 0 | 0  | 0 | 0  |
| 0  | 0  | 0  | 0  | 0  | 0  | 0 | 13 | 0 | 0  |
| 0  | 0  | 0  | 0  | 0  | 0  | 0 | 0  | 0 | 13 |
| 0  | 0  | 0  | 0  | 0  | 0  | 0 | 0  | 0 | 0  |
| 0  | 0  | 0  | 0  | 0  | 0  | 0 | 0  | 0 | 0  |
| 0  | 0  | 0  | 0  | 0  | 0  | 0 | 0  | 0 | 0  |
| 0  | 0  | 0  | 0  | 0  | 0  | 0 | 0  | 0 | 0  |
| 0  | 0  | 0  | 0  | 0  | 0  | 0 | 0  | 0 | 0  |
| 0  | 0  | 0  | 0  | 0  | 0  | 0 | 0  | 0 | 0  |
| 0  | 0  | 0  | 0  | 0  | 0  | 0 | 0  | 0 | 0  |
| 0  | 0  | 0  | 0  | 0  | 0  | 0 | 0  | 0 | 0  |
| 0  | 0  | 6  | 0  | 0  | 0  | 0 | 0  | 0 | 0  |
| 0  | 0  | 0  | 0  | 0  | 0  | 0 | 0  | 0 | 0  |
| 0  | 0  | 0  | 0  | 0  | 5  | 0 | 0  | 0 | 0  |
| 0  | 0  | 0  | 0  | 0  | 0  | 0 | 0  | 0 | 0  |
| 12 | 0  | 0  | 0  | 0  | 0  | 0 | 0  | 0 | 0  |
| 3  | 0  | 9  | 0  | 0  | 0  | 0 | 0  | 0 | 0  |
| 3  | 0  | 6  | 0  | 0  | 3  | 0 | 0  | 0 | 0  |
| 0  | 12 | 0  | 0  | 0  | 0  | 0 | 0  | 0 | 0  |
| 0  | 12 | 0  | 0  | 0  | 0  | 0 | 0  | 0 | 0  |
| 0  | 0  | 12 | 0  | 0  | 0  | 0 | 0  | 0 | 0  |
| 0  | 0  | 12 | 0  | 0  | 0  | 0 | 0  | 0 | 0  |
| 0  | 0  | 12 | 0  | 0  | 0  | 0 | 0  | 0 | 0  |

[illegible]

[illegible]

|   |   |   |   |   |   |   |   |   |   |
|---|---|---|---|---|---|---|---|---|---|
| 0 | 0 | 0 | 0 | 0 | 5 | 0 | 0 | 0 | 0 |
| 0 | 9 | 0 | 0 | 0 | 0 | 0 | 0 | 0 | 0 |
| 0 | 9 | 0 | 0 | 0 | 0 | 0 | 0 | 0 | 0 |
| 0 | 9 | 0 | 0 | 0 | 0 | 0 | 0 | 0 | 0 |
| 0 | 0 | 9 | 0 | 0 | 0 | 0 | 0 | 0 | 0 |
| 0 | 0 | 9 | 0 | 0 | 0 | 0 | 0 | 0 | 0 |
| 0 | 0 | 9 | 0 | 0 | 0 | 0 | 0 | 0 | 0 |
| 0 | 0 | 9 | 0 | 0 | 0 | 0 | 0 | 0 | 0 |
| 0 | 0 | 9 | 0 | 0 | 0 | 0 | 0 | 0 | 0 |
| 0 | 0 | 9 | 0 | 0 | 0 | 0 | 0 | 0 | 0 |
| 0 | 0 | 9 | 0 | 0 | 0 | 0 | 0 | 0 | 0 |
| 0 | 0 | 9 | 0 | 0 | 0 | 0 | 0 | 0 | 0 |
| 0 | 0 | 6 | 0 | 0 | 0 | 0 | 0 | 0 | 0 |
| 0 | 0 | 0 | 9 | 0 | 0 | 0 | 0 | 0 | 0 |
| 0 | 0 | 0 | 9 | 0 | 0 | 0 | 0 | 0 | 0 |
| 0 | 0 | 0 | 9 | 0 | 0 | 0 | 0 | 0 | 0 |
| 0 | 0 | 0 | 5 | 0 | 0 | 0 | 4 | 0 | 0 |
| 0 | 0 | 0 | 0 | 9 | 0 | 0 | 0 | 0 | 0 |
| 0 | 0 | 0 | 0 | 9 | 0 | 0 | 0 | 0 | 0 |
| 0 | 0 | 0 | 0 | 9 | 0 | 0 | 0 | 0 | 0 |
| 0 | 0 | 0 | 0 | 0 | 9 | 0 | 0 | 0 | 0 |
| 0 | 0 | 0 | 0 | 0 | 9 | 0 | 0 | 0 | 0 |
| 0 | 0 | 0 | 0 | 0 | 9 | 0 | 0 | 0 | 0 |
| 0 | 0 | 0 | 0 | 0 | 9 | 0 | 0 | 0 | 0 |
| 0 | 0 | 0 | 0 | 0 | 9 | 0 | 0 | 0 | 0 |
| 0 | 0 | 0 | 0 | 0 | 9 | 0 | 0 | 0 | 0 |
| 0 | 0 | 0 | 0 | 0 | 9 | 0 | 0 | 0 | 0 |
| 0 | 0 | 0 | 0 | 0 | 0 | 9 | 0 | 0 | 0 |
| 0 | 0 | 0 | 0 | 0 | 0 | 0 | 0 | 0 | 0 |
| 0 | 0 | 0 | 0 | 0 | 0 | 0 | 0 | 0 | 0 |
| 0 | 0 | 0 | 0 | 0 | 0 | 0 | 0 | 0 | 0 |
| 0 | 0 | 0 | 0 | 0 | 0 | 0 | 0 | 0 | 0 |
| 0 | 0 | 0 | 0 | 0 | 0 | 0 | 0 | 0 | 0 |
| 0 | 0 | 0 | 0 | 0 | 0 | 0 | 0 | 0 | 0 |
| 0 | 0 | 0 | 0 | 0 | 0 | 0 | 0 | 0 | 0 |
| 0 | 0 | 0 | 0 | 0 | 0 | 0 | 0 | 0 | 0 |
| 0 | 0 | 0 | 0 | 0 | 0 | 0 | 0 | 0 | 0 |
| 0 | 0 | 0 | 0 | 0 | 0 | 0 | 0 | 0 | 0 |
| 0 | 0 | 0 | 0 | 0 | 0 | 0 | 0 | 0 | 0 |
| 0 | 0 | 0 | 0 | 0 | 0 | 0 | 0 | 0 | 0 |
| 0 | 0 | 0 | 0 | 0 | 0 | 0 | 0 | 0 | 0 |
| 0 | 0 | 0 | 0 | 0 | 0 | 0 | 0 | 0 | 0 |
| 8 | 0 | 0 | 0 | 0 | 0 | 0 | 0 | 0 | 0 |
| 3 | 0 | 0 | 0 | 0 | 0 | 0 | 5 | 0 | 0 |
| 0 | 8 | 0 | 0 | 0 | 0 | 0 | 0 | 0 | 0 |

[illegible]

[illegible]

[illegible]



[illegible]

[illegible]

[illegible]

[illegible]

[illegible]

[illegible]

[illegible]

[illegible]



[illegible]

|     |    |     |     |    |     |    |     |    |   |
|-----|----|-----|-----|----|-----|----|-----|----|---|
| 0   | 0  | 0   | 401 | 0  | 0   | 0  | 0   | 0  | 0 |
| 4   | 15 | 25  | 0   | 20 | 51  | 6  | 10  | 4  | 0 |
| 12  | 0  | 0   | 128 | 36 | 182 | 0  | 0   | 0  | 0 |
| 0   | 13 | 16  | 49  | 17 | 140 | 6  | 5   | 0  | 2 |
| 4   | 21 | 0   | 114 | 65 | 119 | 0  | 0   | 0  | 0 |
| 0   | 0  | 0   | 291 | 22 | 0   | 0  | 0   | 0  | 0 |
| 0   | 0  | 0   | 0   | 0  | 0   | 0  | 298 | 0  | 0 |
| 0   | 0  | 0   | 0   | 0  | 0   | 0  | 0   | 0  | 0 |
| 0   | 57 | 42  | 44  | 9  | 18  | 0  | 0   | 0  | 0 |
| 0   | 3  | 0   | 213 | 0  | 16  | 0  | 0   | 0  | 0 |
| 9   | 34 | 14  | 132 | 0  | 15  | 0  | 0   | 0  | 0 |
| 0   | 0  | 0   | 183 | 0  | 16  | 0  | 0   | 0  | 0 |
| 187 | 0  | 0   | 0   | 0  | 11  | 0  | 0   | 0  | 0 |
| 0   | 16 | 10  | 62  | 26 | 80  | 0  | 0   | 0  | 0 |
| 0   | 0  | 0   | 159 | 0  | 30  | 0  | 0   | 0  | 0 |
| 0   | 0  | 0   | 0   | 0  | 0   | 0  | 0   | 0  | 0 |
| 0   | 0  | 0   | 150 | 0  | 0   | 0  | 0   | 0  | 0 |
| 0   | 0  | 0   | 46  | 0  | 96  | 0  | 0   | 0  | 0 |
| 0   | 0  | 0   | 131 | 0  | 0   | 0  | 0   | 0  | 0 |
| 0   | 0  | 0   | 0   | 26 | 63  | 0  | 0   | 0  | 0 |
| 0   | 0  | 103 | 0   | 0  | 0   | 0  | 0   | 0  | 0 |
| 0   | 0  | 0   | 78  | 0  | 0   | 0  | 0   | 0  | 0 |
| 2   | 0  | 0   | 42  | 0  | 50  | 0  | 0   | 0  | 0 |
| 0   | 0  | 0   | 90  | 0  | 0   | 0  | 0   | 0  | 0 |
| 0   | 0  | 0   | 19  | 14 | 47  | 0  | 0   | 0  | 0 |
| 0   | 0  | 0   | 83  | 0  | 0   | 0  | 0   | 0  | 0 |
| 0   | 0  | 0   | 76  | 0  | 0   | 0  | 0   | 0  | 0 |
| 16  | 0  | 0   | 59  | 0  | 0   | 0  | 0   | 0  | 0 |
| 0   | 0  | 0   | 73  | 0  | 0   | 0  | 0   | 0  | 0 |
| 0   | 0  | 0   | 0   | 71 | 0   | 0  | 0   | 0  | 0 |
| 0   | 0  | 0   | 35  | 0  | 33  | 0  | 0   | 0  | 0 |
| 35  | 10 | 22  | 0   | 0  | 0   | 0  | 0   | 0  | 0 |
| 0   | 0  | 0   | 0   | 0  | 0   | 0  | 0   | 0  | 0 |
| 0   | 0  | 0   | 11  | 0  | 5   | 0  | 0   | 0  | 0 |
| 0   | 0  | 0   | 0   | 62 | 0   | 0  | 0   | 0  | 0 |
| 0   | 0  | 0   | 0   | 0  | 0   | 0  | 0   | 0  | 0 |
| 0   | 0  | 0   | 52  | 0  | 5   | 0  | 0   | 0  | 0 |
| 0   | 0  | 0   | 56  | 0  | 0   | 0  | 0   | 0  | 0 |
| 0   | 0  | 0   | 54  | 0  | 0   | 0  | 0   | 0  | 0 |
| 0   | 0  | 0   | 11  | 0  | 0   | 15 | 0   | 26 | 0 |
| 0   | 0  | 0   | 17  | 0  | 34  | 0  | 0   | 0  | 0 |
| 0   | 0  | 0   | 0   | 0  | 0   | 0  | 0   | 0  | 0 |
| 0   | 0  | 0   | 50  | 0  | 0   | 0  | 0   | 0  | 0 |
| 2   | 0  | 7   | 15  | 5  | 20  | 0  | 0   | 0  | 0 |
| 0   | 0  | 0   | 49  | 0  | 0   | 0  | 0   | 0  | 0 |
| 0   | 0  | 0   | 49  | 0  | 0   | 0  | 0   | 0  | 0 |
| 0   | 0  | 0   | 0   | 0  | 0   | 0  | 0   | 0  | 0 |
| 0   | 0  | 0   | 0   | 43 | 0   | 0  | 0   | 0  | 0 |
| 0   | 0  | 0   | 0   | 0  | 0   | 0  | 0   | 0  | 0 |
| 0   | 0  | 0   | 0   | 0  | 41  | 0  | 0   | 0  | 0 |



|    |    |    |    |    |    |   |   |   |   |
|----|----|----|----|----|----|---|---|---|---|
| 0  | 0  | 0  | 0  | 0  | 0  | 0 | 0 | 0 | 0 |
| 0  | 0  | 0  | 0  | 0  | 0  | 0 | 0 | 0 | 0 |
| 0  | 0  | 0  | 0  | 0  | 0  | 0 | 0 | 0 | 0 |
| 0  | 0  | 0  | 0  | 18 | 3  | 0 | 0 | 0 | 0 |
| 0  | 0  | 0  | 0  | 0  | 0  | 0 | 0 | 0 | 0 |
| 0  | 0  | 0  | 20 | 0  | 0  | 0 | 0 | 0 | 0 |
| 0  | 0  | 0  | 20 | 0  | 0  | 0 | 0 | 0 | 0 |
| 0  | 0  | 0  | 0  | 0  | 0  | 0 | 0 | 0 | 0 |
| 0  | 0  | 0  | 0  | 0  | 0  | 0 | 0 | 0 | 0 |
| 0  | 0  | 0  | 0  | 0  | 0  | 0 | 0 | 0 | 0 |
| 0  | 0  | 0  | 19 | 0  | 0  | 0 | 0 | 0 | 0 |
| 0  | 0  | 0  | 19 | 0  | 0  | 0 | 0 | 0 | 0 |
| 0  | 0  | 0  | 0  | 0  | 19 | 0 | 0 | 0 | 0 |
| 0  | 0  | 0  | 0  | 18 | 0  | 0 | 0 | 0 | 0 |
| 0  | 0  | 0  | 0  | 0  | 18 | 0 | 0 | 0 | 0 |
| 0  | 0  | 0  | 0  | 0  | 0  | 0 | 0 | 0 | 0 |
| 0  | 0  | 0  | 0  | 0  | 0  | 0 | 0 | 0 | 0 |
| 11 | 0  | 0  | 0  | 0  | 6  | 0 | 0 | 0 | 0 |
| 0  | 0  | 17 | 0  | 0  | 0  | 0 | 0 | 0 | 0 |
| 0  | 0  | 0  | 17 | 0  | 0  | 0 | 0 | 0 | 0 |
| 0  | 0  | 0  | 17 | 0  | 0  | 0 | 0 | 0 | 0 |
| 0  | 0  | 0  | 17 | 0  | 0  | 0 | 0 | 0 | 0 |
| 0  | 0  | 0  | 0  | 17 | 0  | 0 | 0 | 0 | 0 |
| 0  | 0  | 0  | 0  | 10 | 2  | 5 | 0 | 0 | 0 |
| 0  | 0  | 0  | 0  | 0  | 17 | 0 | 0 | 0 | 0 |
| 0  | 0  | 16 | 0  | 0  | 0  | 0 | 0 | 0 | 0 |
| 0  | 0  | 0  | 16 | 0  | 0  | 0 | 0 | 0 | 0 |
| 0  | 0  | 0  | 10 | 6  | 0  | 0 | 0 | 0 | 0 |
| 0  | 0  | 0  | 0  | 16 | 0  | 0 | 0 | 0 | 0 |
| 0  | 0  | 0  | 0  | 0  | 16 | 0 | 0 | 0 | 0 |
| 0  | 0  | 0  | 0  | 0  | 0  | 0 | 0 | 0 | 0 |
| 0  | 0  | 0  | 15 | 0  | 0  | 0 | 0 | 0 | 0 |
| 0  | 0  | 0  | 15 | 0  | 0  | 0 | 0 | 0 | 0 |
| 0  | 14 | 0  | 0  | 0  | 0  | 0 | 0 | 0 | 0 |
| 0  | 0  | 0  | 14 | 0  | 0  | 0 | 0 | 0 | 0 |
| 0  | 0  | 0  | 0  | 0  | 0  | 0 | 0 | 0 | 0 |
| 0  | 3  | 0  | 0  | 8  | 0  | 0 | 0 | 0 | 0 |
| 0  | 0  | 0  | 0  | 0  | 7  | 0 | 0 | 0 | 0 |
| 0  | 13 | 0  | 0  | 0  | 0  | 0 | 0 | 0 | 0 |
| 0  | 0  | 13 | 0  | 0  | 0  | 0 | 0 | 0 | 0 |
| 0  | 0  | 9  | 0  | 0  | 4  | 0 | 0 | 0 | 0 |
| 0  | 0  | 0  | 13 | 0  | 0  | 0 | 0 | 0 | 0 |
| 0  | 0  | 0  | 13 | 0  | 0  | 0 | 0 | 0 | 0 |
| 0  | 0  | 0  | 13 | 0  | 0  | 0 | 0 | 0 | 0 |
| 0  | 0  | 0  | 0  | 9  | 0  | 0 | 0 | 0 | 0 |
| 0  | 0  | 0  | 0  | 0  | 13 | 0 | 0 | 0 | 0 |
| 0  | 0  | 0  | 0  | 0  | 13 | 0 | 0 | 0 | 0 |
| 0  | 0  | 0  | 0  | 0  | 13 | 0 | 0 | 0 | 0 |
| 0  | 0  | 0  | 0  | 0  | 0  | 0 | 0 | 0 | 0 |
| 0  | 12 | 0  | 0  | 0  | 0  | 0 | 0 | 0 | 0 |



[illegible]

[illegible]

|      |       |       |      |     |      |        |      |       |     |
|------|-------|-------|------|-----|------|--------|------|-------|-----|
| 0    | 0     | 0     | 0    | 0   | 2    | 0      | 0    | 0     | 0   |
| 0    | 0     | 0     | 0    | 0   | 0    | 2      | 0    | 0     | 0   |
| 0    | 0     | 0     | 0    | 0   | 0    | 0      | 0    | 0     | 2   |
| 0    | 0     | 0     | 0    | 0   | 0    | 0      | 0    | 0     | 0   |
| 0    | 0     | 0     | 0    | 0   | 0    | 0      | 0    | 0     | 0   |
| 0    | 0     | 0     | 0    | 0   | 0    | 0      | 0    | 0     | 0   |
| 0    | 0     | 0     | 0    | 0   | 0    | 0      | 0    | 0     | 0   |
| 0    | 0     | 0     | 0    | 0   | 0    | 0      | 0    | 0     | 0   |
| 0    | 0     | 0     | 0    | 0   | 0    | 0      | 0    | 0     | 0   |
| 0    | 0     | 0     | 0    | 0   | 0    | 0      | 0    | 0     | 0   |
| 0    | 20    | 0     | 0    | 0   | 0    | 0      | 0    | 0     | 0   |
| 0    | 0     | 0     | 0    | 0   | 18   | 0      | 0    | 0     | 0   |
| 0    | 0     | 0     | 0    | 0   | 0    | 0      | 0    | 0     | 0   |
| 0    | 0     | 0     | 0    | 0   | 0    | 0      | 0    | 0     | 0   |
| 0    | 0     | 0     | 0    | 0   | 0    | 0      | 0    | 0     | 0   |
| 0    | 0     | 0     | 0    | 0   | 0    | 0      | 0    | 0     | 0   |
| 0    | 0     | 0     | 0    | 0   | 0    | 0      | 0    | 0     | 0   |
| 0    | 0     | 0     | 0    | 0   | 0    | 0      | 0    | 0     | 0   |
| 0    | 6     | 0     | 0    | 0   | 0    | 0      | 0    | 0     | 0   |
| 0    | 0     | 0     | 0    | 0   | 0    | 0      | 0    | 0     | 0   |
| 0    | 0     | 0     | 0    | 0   | 0    | 0      | 0    | 0     | 0   |
| 0    | 0     | 0     | 0    | 0   | 0    | 0      | 0    | 0     | 0   |
| 0    | 0     | 0     | 0    | 0   | 0    | 0      | 0    | 0     | 0   |
| 0    | 0     | 0     | 0    | 0   | 0    | 0      | 0    | 0     | 0   |
| 0    | 0     | 0     | 0    | 0   | 0    | 0      | 0    | 0     | 0   |
| 0    | 0     | 0     | 0    | 0   | 0    | 0      | 0    | 0     | 0   |
| 0    | 0     | 0     | 2    | 0   | 0    | 0      | 0    | 0     | 0   |
| 0    | 0     | 0     | 0    | 0   | 2    | 0      | 0    | 0     | 0   |
| 8    | 1640  | 1228  | 1793 | 773 | 3031 | 107559 | 2699 | 89878 | 468 |
| 4535 | 38895 | 29132 | 32   | 20  | 217  | 43     | 144  | 19    | 14  |
| 65   | 0     | 0     | 0    | 0   | 657  | 0      | 0    | 0     | 0   |
| 0    | 0     | 0     | 0    | 0   | 0    | 0      | 0    | 0     | 0   |
| 0    | 0     | 0     | 0    | 0   | 0    | 0      | 0    | 0     | 0   |
| 0    | 254   | 168   | 204  | 115 | 358  | 2079   | 6666 | 7072  | 0   |
| 0    | 142   | 123   | 169  | 71  | 278  | 1466   | 188  | 13970 | 44  |
| 0    | 99    | 67    | 123  | 49  | 207  | 10291  | 145  | 1922  | 0   |
| 154  | 0     | 0     | 0    | 0   | 1212 | 0      | 0    | 0     | 0   |
| 0    | 0     | 0     | 0    | 0   | 0    | 0      | 0    | 0     | 0   |
| 4    | 59    | 49    | 43   | 21  | 66   | 5226   | 23   | 637   | 11  |
| 0    | 0     | 0     | 89   | 0   | 112  | 5003   | 0    | 509   | 0   |
| 0    | 53    | 43    | 74   | 26  | 108  | 387    | 47   | 4160  | 18  |
| 338  | 2412  | 1560  | 0    | 0   | 0    | 0      | 0    | 0     | 0   |
| 0    | 62    | 41    | 79   | 36  | 95   | 569    | 55   | 2491  | 25  |
| 0    | 0     | 0     | 0    | 0   | 0    | 3279   | 0    | 0     | 0   |
| 0    | 0     | 0     | 0    | 0   | 0    | 0      | 0    | 0     | 0   |
| 0    | 0     | 0     | 0    | 0   | 0    | 0      | 0    | 0     | 0   |
| 0    | 0     | 0     | 0    | 0   | 184  | 0      | 0    | 0     | 0   |
| 0    | 0     | 0     | 0    | 0   | 0    | 0      | 0    | 0     | 0   |
| 0    | 0     | 0     | 0    | 0   | 0    | 0      | 0    | 0     | 0   |
| 0    | 0     | 0     | 0    | 0   | 0    | 0      | 0    | 0     | 0   |
| 0    | 30    | 0     | 0    | 0   | 0    | 0      | 34   | 0     | 0   |
| 0    | 0     | 0     | 0    | 0   | 0    | 1890   | 115  | 447   | 0   |
| 118  | 1273  | 969   | 0    | 0   | 0    | 0      | 0    | 0     | 0   |
| 174  | 1332  | 797   | 0    | 0   | 0    | 0      | 0    | 0     | 0   |





|     |     |     |     |   |     |     |   |     |   |
|-----|-----|-----|-----|---|-----|-----|---|-----|---|
|     | 0   | 0   | 0   | 0 | 0   | 0   | 0 | 0   | 0 |
|     | 0   | 0   | 0   | 0 | 0   | 0   | 0 | 0   | 0 |
|     | 226 | 168 | 0   | 0 | 0   | 0   | 0 | 0   | 0 |
|     | 0   | 0   | 29  | 0 | 0   | 0   | 0 | 0   | 0 |
|     | 0   | 0   | 0   | 0 | 0   | 0   | 0 | 0   | 0 |
|     | 0   | 0   | 0   | 0 | 0   | 0   | 0 | 390 | 0 |
|     | 0   | 0   | 0   | 0 | 0   | 0   | 0 | 0   | 0 |
|     | 0   | 0   | 0   | 0 | 0   | 0   | 0 | 0   | 0 |
|     | 0   | 0   | 0   | 0 | 0   | 0   | 0 | 0   | 0 |
|     | 0   | 0   | 319 | 0 | 0   | 0   | 0 | 0   | 0 |
|     | 0   | 0   | 0   | 0 | 0   | 0   | 0 | 0   | 0 |
|     | 0   | 0   | 0   | 0 | 0   | 0   | 0 | 0   | 0 |
|     | 0   | 0   | 0   | 0 | 0   | 0   | 0 | 360 | 0 |
|     | 0   | 0   | 0   | 0 | 0   | 0   | 0 | 0   | 0 |
|     | 0   | 0   | 0   | 0 | 0   | 0   | 0 | 350 | 0 |
|     | 0   | 0   | 0   | 0 | 0   | 296 | 0 | 46  | 0 |
|     | 0   | 0   | 0   | 0 | 0   | 0   | 0 | 0   | 0 |
|     | 0   | 0   | 0   | 0 | 318 | 0   | 0 | 0   | 0 |
|     | 0   | 0   | 0   | 0 | 0   | 0   | 0 | 0   | 0 |
|     | 0   | 0   | 0   | 0 | 0   | 0   | 0 | 0   | 0 |
|     | 0   | 0   | 0   | 0 | 0   | 316 | 0 | 0   | 0 |
|     | 0   | 0   | 0   | 0 | 0   | 0   | 0 | 313 | 0 |
|     | 0   | 0   | 0   | 0 | 0   | 0   | 0 | 0   | 0 |
| 181 | 92  | 30  | 0   | 0 | 0   | 0   | 0 | 0   | 0 |
| 173 | 77  | 23  | 0   | 0 | 19  | 0   | 0 | 4   | 0 |
|     | 0   | 0   | 0   | 0 | 0   | 0   | 0 | 0   | 0 |
|     | 0   | 0   | 0   | 0 | 0   | 0   | 0 | 288 | 0 |
|     | 0   | 0   | 0   | 0 | 0   | 200 | 0 | 87  | 0 |
|     | 0   | 0   | 0   | 0 | 0   | 0   | 0 | 0   | 0 |
|     | 0   | 0   | 0   | 0 | 0   | 0   | 0 | 0   | 0 |
|     | 0   | 0   | 0   | 0 | 0   | 0   | 0 | 0   | 0 |
|     | 0   | 0   | 0   | 0 | 0   | 0   | 0 | 0   | 0 |
|     | 0   | 0   | 0   | 0 | 0   | 0   | 0 | 0   | 0 |
|     | 0   | 0   | 0   | 0 | 0   | 0   | 0 | 0   | 0 |
|     | 0   | 0   | 0   | 0 | 0   | 0   | 0 | 0   | 0 |
|     | 0   | 0   | 0   | 0 | 0   | 0   | 0 | 260 | 0 |
|     | 0   | 0   | 0   | 0 | 0   | 250 | 0 | 0   | 0 |
|     | 0   | 0   | 0   | 0 | 0   | 0   | 0 | 247 | 0 |
|     | 0   | 0   | 0   | 0 | 0   | 0   | 0 | 0   | 0 |
|     | 0   | 0   | 0   | 0 | 0   | 0   | 0 | 0   | 0 |
|     | 0   | 0   | 0   | 0 | 0   | 0   | 0 | 0   | 0 |
|     | 0   | 0   | 0   | 0 | 0   | 0   | 0 | 0   | 0 |
|     | 0   | 0   | 0   | 0 | 0   | 0   | 0 | 0   | 0 |
|     | 0   | 0   | 0   | 0 | 0   | 0   | 0 | 0   | 0 |
|     | 0   | 0   | 0   | 0 | 0   | 0   | 0 | 0   | 0 |
|     | 231 | 0   | 0   | 0 | 0   | 0   | 0 | 0   | 0 |
|     | 13  | 0   | 0   | 0 | 0   | 0   | 0 | 0   | 0 |
|     | 0   | 0   | 0   | 0 | 0   | 0   | 0 | 0   | 0 |
|     | 0   | 0   | 0   | 0 | 28  | 125 | 0 | 63  | 0 |
|     | 0   | 0   | 0   | 0 | 0   | 0   | 0 | 0   | 0 |
|     | 0   | 0   | 0   | 0 | 0   | 0   | 0 | 214 | 0 |
|     | 0   | 0   | 0   | 0 | 0   | 0   | 0 | 0   | 0 |
|     | 0   | 0   | 69  | 0 | 11  | 0   | 0 | 0   | 0 |

[illegible]

|   |    |    |    |    |    |     |   |   |   |
|---|----|----|----|----|----|-----|---|---|---|
| 0 | 0  | 0  | 0  | 0  | 0  | 0   | 0 | 0 | 0 |
| 0 | 0  | 0  | 17 | 0  | 49 | 0   | 0 | 0 | 0 |
| 0 | 0  | 0  | 0  | 0  | 0  | 0   | 0 | 0 | 0 |
| 0 | 0  | 0  | 0  | 0  | 0  | 0   | 0 | 0 | 0 |
| 0 | 0  | 36 | 0  | 0  | 0  | 0   | 0 | 0 | 0 |
| 0 | 0  | 0  | 0  | 0  | 0  | 0   | 0 | 0 | 0 |
| 0 | 0  | 0  | 0  | 0  | 0  | 0   | 0 | 0 | 0 |
| 0 | 0  | 0  | 0  | 0  | 0  | 0   | 0 | 0 | 0 |
| 0 | 0  | 0  | 0  | 0  | 0  | 0   | 0 | 0 | 0 |
| 0 | 0  | 0  | 0  | 0  | 0  | 0   | 0 | 0 | 0 |
| 0 | 16 | 0  | 0  | 0  | 0  | 0   | 0 | 0 | 0 |
| 0 | 0  | 0  | 0  | 15 | 0  | 0   | 0 | 0 | 0 |
| 0 | 14 | 0  | 0  | 0  | 0  | 0   | 0 | 0 | 0 |
| 0 | 13 | 0  | 0  | 0  | 0  | 0   | 0 | 0 | 0 |
| 0 | 0  | 0  | 0  | 0  | 0  | 0   | 0 | 0 | 0 |
| 0 | 0  | 0  | 0  | 0  | 0  | 0   | 0 | 0 | 0 |
| 0 | 0  | 0  | 0  | 0  | 0  | 0   | 0 | 0 | 0 |
| 0 | 0  | 0  | 10 | 0  | 0  | 0   | 0 | 0 | 0 |
| 0 | 0  | 0  | 0  | 0  | 0  | 0   | 0 | 0 | 0 |
| 0 | 0  | 0  | 0  | 0  | 0  | 0   | 0 | 0 | 0 |
| 0 | 0  | 0  | 0  | 0  | 0  | 0   | 0 | 0 | 0 |
| 0 | 0  | 6  | 0  | 0  | 0  | 0   | 0 | 0 | 0 |
| 0 | 0  | 0  | 0  | 0  | 6  | 0   | 0 | 0 | 0 |
| 0 | 0  | 0  | 0  | 0  | 0  | 0   | 0 | 0 | 0 |
| 0 | 0  | 0  | 0  | 5  | 0  | 0   | 0 | 0 | 0 |
| 0 | 0  | 0  | 0  | 0  | 5  | 0   | 0 | 0 | 0 |
| 0 | 0  | 0  | 0  | 0  | 0  | 0   | 0 | 0 | 5 |
| 0 | 0  | 0  | 0  | 0  | 0  | 0   | 0 | 0 | 0 |
| 0 | 0  | 0  | 0  | 0  | 0  | 0   | 0 | 0 | 0 |
| 0 | 0  | 0  | 0  | 0  | 0  | 0   | 0 | 0 | 0 |
| 0 | 0  | 0  | 0  | 0  | 2  | 0   | 0 | 0 | 0 |
| 0 | 63 | 51 | 2  | 0  | 10 | 0   | 0 | 2 | 0 |
| 0 | 0  | 0  | 0  | 0  | 0  | 0   | 0 | 0 | 0 |
| 0 | 24 | 7  | 0  | 0  | 14 | 0   | 0 | 0 | 0 |
| 0 | 0  | 0  | 16 | 0  | 0  | 0   | 0 | 0 | 0 |
| 0 | 11 | 0  | 0  | 0  | 0  | 0   | 0 | 0 | 0 |
| 0 | 0  | 10 | 0  | 0  | 0  | 0   | 0 | 0 | 0 |
| 0 | 0  | 8  | 0  | 0  | 0  | 0   | 0 | 0 | 0 |
| 7 | 0  | 0  | 0  | 0  | 0  | 0   | 0 | 0 | 0 |
| 0 | 7  | 0  | 0  | 0  | 0  | 0   | 0 | 0 | 0 |
| 0 | 0  | 0  | 0  | 0  | 0  | 0   | 7 | 0 | 0 |
| 0 | 0  | 0  | 0  | 0  | 0  | 0   | 0 | 0 | 0 |
| 0 | 0  | 0  | 0  | 0  | 5  | 0   | 0 | 0 | 0 |
| 0 | 0  | 0  | 0  | 0  | 0  | 0   | 0 | 0 | 0 |
| 0 | 0  | 0  | 0  | 0  | 0  | 0   | 0 | 0 | 0 |
| 0 | 0  | 0  | 0  | 0  | 0  | 0   | 0 | 0 | 0 |
| 0 | 0  | 0  | 0  | 0  | 0  | 0   | 0 | 0 | 0 |
| 0 | 0  | 0  | 0  | 0  | 0  | 0   | 0 | 0 | 0 |
| 0 | 0  | 0  | 0  | 0  | 0  | 0   | 0 | 0 | 0 |
| 0 | 0  | 0  | 0  | 0  | 0  | 0   | 0 | 0 | 0 |
| 0 | 0  | 0  | 0  | 0  | 0  | 0   | 0 | 0 | 0 |
| 0 | 0  | 0  | 0  | 0  | 0  | 0   | 0 | 0 | 0 |
| 0 | 0  | 0  | 0  | 0  | 0  | 0   | 0 | 0 | 0 |
| 0 | 0  | 0  | 0  | 0  | 0  | 0   | 0 | 0 | 0 |
| 0 | 0  | 0  | 0  | 0  | 0  | 128 | 0 | 0 | 0 |

[illegible]

[illegible]

[illegible]

[illegible]



[illegible]

[illegible]

[illegible]

[illegible]

[illegible]

[illegible]

[illegible]

[illegible]



[illegible]

[illegible]

[illegible]

[illegible]

[illegible]

[illegible]

[illegible]

[illegible]



[illegible]

[illegible]



|   |   |   |   |   |   |   |   |   |   |
|---|---|---|---|---|---|---|---|---|---|
| 0 | 8 | 0 | 0 | 0 | 0 | 0 | 0 | 0 | 0 |
| 0 | 8 | 0 | 0 | 0 | 0 | 0 | 0 | 0 | 0 |
| 0 | 0 | 8 | 0 | 0 | 0 | 0 | 0 | 0 | 0 |
| 0 | 0 | 8 | 0 | 0 | 0 | 0 | 0 | 0 | 0 |
| 0 | 0 | 8 | 0 | 0 | 0 | 0 | 0 | 0 | 0 |
| 0 | 0 | 8 | 0 | 0 | 0 | 0 | 0 | 0 | 0 |
| 0 | 0 | 8 | 0 | 0 | 0 | 0 | 0 | 0 | 0 |
| 0 | 0 | 0 | 8 | 0 | 0 | 0 | 0 | 0 | 0 |
| 0 | 0 | 0 | 8 | 0 | 0 | 0 | 0 | 0 | 0 |
| 0 | 0 | 0 | 8 | 0 | 0 | 0 | 0 | 0 | 0 |
| 0 | 0 | 0 | 6 | 0 | 2 | 0 | 0 | 0 | 0 |
| 0 | 0 | 0 | 0 | 8 | 0 | 0 | 0 | 0 | 0 |
| 0 | 0 | 0 | 0 | 5 | 0 | 0 | 0 | 3 | 0 |
| 0 | 0 | 0 | 0 | 0 | 8 | 0 | 0 | 0 | 0 |
| 0 | 0 | 0 | 0 | 0 | 8 | 0 | 0 | 0 | 0 |
| 0 | 0 | 0 | 0 | 0 | 4 | 0 | 0 | 2 | 0 |
| 0 | 0 | 0 | 0 | 0 | 0 | 0 | 0 | 0 | 0 |
| 0 | 0 | 0 | 0 | 0 | 0 | 0 | 0 | 0 | 0 |
| 0 | 0 | 0 | 0 | 0 | 0 | 0 | 0 | 0 | 0 |
| 0 | 0 | 0 | 0 | 0 | 0 | 0 | 0 | 0 | 0 |
| 0 | 0 | 0 | 0 | 0 | 0 | 0 | 0 | 0 | 0 |
| 0 | 0 | 0 | 0 | 0 | 0 | 0 | 0 | 0 | 0 |
| 0 | 0 | 0 | 0 | 0 | 0 | 0 | 0 | 0 | 0 |
| 0 | 0 | 0 | 0 | 0 | 0 | 0 | 0 | 0 | 0 |
| 0 | 0 | 0 | 0 | 0 | 0 | 0 | 0 | 0 | 0 |
| 0 | 0 | 0 | 0 | 0 | 0 | 0 | 0 | 0 | 0 |
| 0 | 0 | 0 | 0 | 0 | 0 | 0 | 0 | 0 | 0 |
| 0 | 0 | 0 | 0 | 0 | 0 | 0 | 0 | 0 | 0 |
| 0 | 0 | 0 | 0 | 0 | 0 | 0 | 0 | 0 | 0 |
| 0 | 0 | 0 | 0 | 0 | 0 | 0 | 0 | 0 | 0 |
| 0 | 0 | 0 | 0 | 0 | 0 | 0 | 0 | 0 | 0 |
| 7 | 0 | 0 | 0 | 0 | 0 | 0 | 0 | 0 | 0 |
| 7 | 0 | 0 | 0 | 0 | 0 | 0 | 0 | 0 | 0 |
| 7 | 0 | 0 | 0 | 0 | 0 | 0 | 0 | 0 | 0 |
| 7 | 0 | 0 | 0 | 0 | 0 | 0 | 0 | 0 | 0 |
| 7 | 0 | 0 | 0 | 0 | 0 | 0 | 0 | 0 | 0 |
| 0 | 7 | 0 | 0 | 0 | 0 | 0 | 0 | 0 | 0 |
| 0 | 0 | 7 | 0 | 0 | 0 | 0 | 0 | 0 | 0 |
| 0 | 0 | 7 | 0 | 0 | 0 | 0 | 0 | 0 | 0 |
| 0 | 0 | 7 | 0 | 0 | 0 | 0 | 0 | 0 | 0 |
| 0 | 0 | 0 | 7 | 0 | 0 | 0 | 0 | 0 | 0 |
| 0 | 0 | 0 | 7 | 0 | 0 | 0 | 0 | 0 | 0 |
| 0 | 0 | 0 | 7 | 0 | 0 | 0 | 0 | 0 | 0 |
| 0 | 0 | 0 | 7 | 0 | 0 | 0 | 0 | 0 | 0 |
| 0 | 0 | 0 | 7 | 0 | 0 | 0 | 0 | 0 | 0 |
| 0 | 0 | 0 | 7 | 0 | 0 | 0 | 0 | 0 | 0 |
| 0 | 0 | 0 | 0 | 7 | 0 | 0 | 0 | 0 | 0 |
| 0 | 0 | 0 | 0 | 0 | 7 | 0 | 0 | 0 | 0 |
| 0 | 0 | 0 | 0 | 0 | 7 | 0 | 0 | 0 | 0 |

[illegible]

[illegible]

[illegible]

[illegible]



[illegible]

|   |   |   |   |   |   |   |   |   |   |
|---|---|---|---|---|---|---|---|---|---|
| 0 | 0 | 0 | 0 | 0 | 2 | 0 | 0 | 0 | 0 |
| 0 | 0 | 0 | 0 | 0 | 2 | 0 | 0 | 0 | 0 |
| 0 | 0 | 0 | 0 | 0 | 2 | 0 | 0 | 0 | 0 |
| 0 | 0 | 0 | 0 | 0 | 2 | 0 | 0 | 0 | 0 |
| 0 | 0 | 0 | 0 | 0 | 2 | 0 | 0 | 0 | 0 |
| 0 | 0 | 0 | 0 | 0 | 2 | 0 | 0 | 0 | 0 |
| 0 | 0 | 0 | 0 | 0 | 2 | 0 | 0 | 0 | 0 |
| 0 | 0 | 0 | 0 | 0 | 2 | 0 | 0 | 0 | 0 |
| 0 | 0 | 0 | 0 | 0 | 2 | 0 | 0 | 0 | 0 |
| 0 | 0 | 0 | 0 | 0 | 0 | 0 | 2 | 0 | 0 |
| 0 | 0 | 0 | 0 | 0 | 0 | 0 | 2 | 0 | 0 |
| 0 | 0 | 0 | 0 | 0 | 0 | 0 | 2 | 0 | 0 |
| 0 | 0 | 0 | 0 | 0 | 0 | 0 | 2 | 0 | 0 |
| 0 | 0 | 0 | 0 | 0 | 0 | 0 | 2 | 0 | 0 |
| 0 | 0 | 0 | 0 | 0 | 0 | 0 | 2 | 0 | 0 |
| 0 | 0 | 0 | 0 | 0 | 0 | 0 | 0 | 2 | 0 |
| 0 | 0 | 0 | 0 | 0 | 0 | 0 | 0 | 2 | 0 |
| 0 | 0 | 0 | 0 | 0 | 0 | 0 | 0 | 2 | 0 |
| 0 | 0 | 0 | 0 | 0 | 0 | 0 | 0 | 2 | 0 |
| 0 | 0 | 0 | 0 | 0 | 0 | 0 | 0 | 0 | 0 |
| 0 | 0 | 0 | 0 | 0 | 0 | 0 | 0 | 0 | 0 |
| 0 | 0 | 0 | 0 | 0 | 0 | 0 | 0 | 0 | 0 |
| 0 | 0 | 0 | 0 | 0 | 0 | 0 | 0 | 0 | 0 |
| 0 | 0 | 0 | 1 | 0 | 0 | 0 | 0 | 0 | 0 |

**SF1697      SF1753**

|       |       |
|-------|-------|
| 72963 | 79829 |
| 1060  | 726   |
| 244   | 231   |
| 112   | 119   |
| 449   | 910   |
| 36476 | 137   |
| 170   | 203   |
| 139   | 151   |
| 86    | 185   |
| 564   | 959   |
| 203   | 139   |
| 62    | 38    |
| 13    | 0     |
| 1821  | 2133  |
| 92    | 95    |
| 94    | 83    |
| 119   | 99    |
| 525   | 236   |
| 152   | 1925  |
| 62    | 221   |
| 124   | 67    |
| 59    | 72    |
| 77    | 51    |
| 53    | 47    |
| 80    | 92    |
| 10    | 15    |
| 114   | 37    |
| 1231  | 2451  |
| 451   | 98    |
| 0     | 29    |
| 33    | 0     |
| 0     | 0     |
| 12    | 817   |
| 0     | 0     |
| 30    | 0     |
| 0     | 0     |
| 25    | 16    |
| 0     | 0     |
| 0     | 34    |
| 102   | 42    |
| 0     | 0     |
| 31    | 47    |
| 0     | 0     |
| 22    | 39    |
| 0     | 32    |
| 4     | 0     |
| 0     | 0     |
| 0     | 35    |

[illegible]

|     |     |
|-----|-----|
| 0   | 0   |
| 0   | 987 |
| 0   | 0   |
| 137 | 0   |
| 0   | 0   |
| 11  | 0   |
| 0   | 0   |
| 0   | 0   |
| 0   | 0   |
| 0   | 0   |
| 0   | 0   |
| 6   | 0   |
| 0   | 0   |
| 0   | 0   |
| 0   | 0   |
| 0   | 0   |
| 0   | 0   |
| 0   | 0   |
| 0   | 0   |
| 0   | 0   |
| 0   | 0   |
| 0   | 0   |
| 0   | 0   |
| 0   | 0   |
| 0   | 0   |
| 196 | 53  |
| 0   | 0   |
| 3   | 4   |
| 15  | 0   |
| 105 | 0   |
| 0   | 38  |
| 0   | 0   |
| 0   | 0   |
| 0   | 0   |
| 0   | 11  |
| 0   | 0   |
| 4   | 11  |
| 0   | 0   |
| 8   | 0   |
| 0   | 0   |
| 0   | 0   |
| 0   | 71  |
| 0   | 18  |
| 0   | 0   |
| 577 | 0   |
| 0   | 0   |
| 0   | 251 |
| 0   | 0   |
| 9   | 23  |
| 0   | 0   |
| 0   | 0   |

[illegible]

|     |    |
|-----|----|
| 0   | 0  |
| 0   | 0  |
| 0   | 0  |
| 0   | 0  |
| 0   | 0  |
| 6   | 13 |
| 3   | 0  |
| 0   | 0  |
| 0   | 0  |
| 128 | 0  |
| 0   | 0  |
| 0   | 0  |
| 0   | 0  |
| 0   | 15 |
| 0   | 0  |
| 0   | 0  |
| 0   | 0  |
| 0   | 0  |
| 0   | 0  |
| 0   | 0  |
| 0   | 0  |
| 115 | 87 |
| 0   | 0  |
| 0   | 0  |
| 0   | 0  |
| 13  | 0  |
| 0   | 0  |
| 0   | 0  |
| 0   | 0  |
| 0   | 0  |
| 0   | 0  |
| 22  | 0  |
| 0   | 0  |
| 0   | 0  |
| 0   | 0  |
| 0   | 0  |
| 0   | 0  |
| 0   | 0  |
| 0   | 0  |
| 12  | 4  |
| 0   | 0  |
| 0   | 0  |
| 48  | 0  |
| 0   | 0  |
| 0   | 0  |
| 0   | 0  |
| 0   | 0  |
| 0   | 0  |
| 7   | 11 |
| 0   | 0  |
| 0   | 0  |

|     |     |
|-----|-----|
| 0   | 0   |
| 0   | 0   |
| 11  | 26  |
| 0   | 0   |
| 0   | 0   |
| 0   | 0   |
| 0   | 0   |
| 0   | 0   |
| 0   | 13  |
| 0   | 0   |
| 0   | 0   |
| 0   | 0   |
| 0   | 0   |
| 0   | 222 |
| 0   | 223 |
| 0   | 16  |
| 0   | 0   |
| 0   | 0   |
| 16  | 3   |
| 0   | 0   |
| 0   | 4   |
| 0   | 49  |
| 185 | 0   |
| 0   | 0   |
| 0   | 0   |
| 0   | 0   |
| 0   | 0   |
| 0   | 0   |
| 0   | 0   |
| 0   | 0   |
| 0   | 0   |
| 0   | 0   |
| 0   | 7   |
| 0   | 0   |
| 12  | 6   |
| 0   | 0   |
| 0   | 0   |
| 0   | 5   |
| 0   | 0   |
| 0   | 0   |
| 0   | 0   |
| 0   | 0   |
| 0   | 0   |
| 0   | 0   |
| 0   | 0   |
| 0   | 0   |
| 0   | 0   |
| 0   | 0   |
| 0   | 5   |
| 0   | 0   |



|    |    |
|----|----|
| 0  | 0  |
| 0  | 0  |
| 0  | 0  |
| 0  | 0  |
| 0  | 0  |
| 0  | 0  |
| 0  | 0  |
| 0  | 0  |
| 0  | 0  |
| 0  | 7  |
| 0  | 0  |
| 0  | 0  |
| 0  | 0  |
| 0  | 0  |
| 0  | 0  |
| 0  | 0  |
| 0  | 0  |
| 0  | 0  |
| 0  | 0  |
| 0  | 0  |
| 0  | 0  |
| 0  | 0  |
| 0  | 37 |
| 0  | 0  |
| 0  | 0  |
| 5  | 0  |
| 0  | 0  |
| 0  | 0  |
| 46 | 0  |
| 0  | 0  |
| 0  | 0  |
| 0  | 0  |
| 0  | 0  |
| 0  | 0  |
| 0  | 0  |
| 0  | 6  |
| 0  | 0  |
| 0  | 0  |
| 0  | 0  |
| 0  | 0  |
| 0  | 0  |
| 0  | 0  |
| 0  | 0  |
| 0  | 0  |
| 0  | 0  |
| 0  | 0  |
| 0  | 0  |
| 0  | 0  |
| 0  | 47 |
| 0  | 0  |
| 0  | 0  |
| 0  | 0  |

[illegible]

[illegible]

|    |    |
|----|----|
| 0  | 0  |
| 0  | 0  |
| 0  | 0  |
| 0  | 0  |
| 0  | 0  |
| 0  | 0  |
| 0  | 5  |
| 0  | 0  |
| 0  | 0  |
| 0  | 0  |
| 0  | 0  |
| 0  | 0  |
| 0  | 0  |
| 0  | 0  |
| 0  | 0  |
| 0  | 0  |
| 0  | 0  |
| 0  | 66 |
| 0  | 0  |
| 0  | 0  |
| 0  | 0  |
| 0  | 0  |
| 0  | 0  |
| 0  | 0  |
| 0  | 0  |
| 0  | 0  |
| 0  | 0  |
| 0  | 0  |
| 0  | 4  |
| 0  | 0  |
| 0  | 0  |
| 0  | 0  |
| 0  | 0  |
| 0  | 0  |
| 0  | 0  |
| 0  | 0  |
| 2  | 0  |
| 0  | 0  |
| 0  | 0  |
| 0  | 0  |
| 0  | 0  |
| 0  | 0  |
| 0  | 0  |
| 0  | 0  |
| 0  | 0  |
| 0  | 0  |
| 0  | 0  |
| 0  | 0  |
| 0  | 0  |
| 0  | 0  |
| 0  | 0  |
| 0  | 0  |
| 0  | 0  |
| 0  | 0  |
| 58 | 0  |
| 54 | 4  |
| 0  | 0  |

[illegible]

[illegible]

[illegible]

|    |    |
|----|----|
| 0  | 0  |
| 0  | 0  |
| 0  | 0  |
| 0  | 0  |
| 0  | 0  |
| 0  | 0  |
| 0  | 0  |
| 0  | 0  |
| 0  | 0  |
| 33 | 0  |
| 0  | 0  |
| 0  | 0  |
| 0  | 0  |
| 0  | 0  |
| 0  | 0  |
| 0  | 0  |
| 0  | 0  |
| 0  | 12 |
| 0  | 0  |
| 0  | 0  |
| 0  | 0  |
| 0  | 0  |
| 0  | 0  |
| 0  | 0  |
| 0  | 0  |
| 0  | 0  |
| 0  | 0  |
| 0  | 0  |
| 0  | 0  |
| 0  | 0  |
| 0  | 0  |
| 0  | 0  |
| 0  | 0  |
| 0  | 0  |
| 0  | 0  |
| 0  | 0  |
| 0  | 0  |
| 0  | 0  |
| 0  | 0  |
| 0  | 0  |
| 0  | 0  |
| 0  | 0  |
| 0  | 0  |
| 0  | 0  |
| 0  | 0  |
| 0  | 0  |
| 0  | 0  |
| 0  | 0  |
| 0  | 0  |
| 0  | 0  |
| 0  | 0  |
| 0  | 0  |
| 29 | 0  |
| 0  | 0  |
| 0  | 0  |
| 0  | 0  |
| 0  | 0  |



[illegible]

[illegible]

[illegible]

[illegible]

[illegible]

[illegible]

[illegible]

[illegible]



[illegible]

[illegible]

[illegible]

[illegible]

[illegible]

[illegible]

[illegible]

[illegible]



[illegible]

[illegible]

[illegible]

[illegible]

[illegible]

|    |    |
|----|----|
| 0  | 0  |
| 0  | 0  |
| 0  | 0  |
| 0  | 0  |
| 0  | 0  |
| 0  | 0  |
| 0  | 0  |
| 0  | 0  |
| 0  | 0  |
| 0  | 0  |
| 0  | 0  |
| 0  | 0  |
| 0  | 0  |
| 0  | 0  |
| 0  | 0  |
| 0  | 0  |
| 0  | 0  |
| 0  | 0  |
| 2  | 0  |
| 2  | 0  |
| 2  | 0  |
| 0  | 2  |
| 0  | 2  |
| 0  | 2  |
| 0  | 2  |
| 0  | 2  |
| 0  | 2  |
| 0  | 2  |
| 0  | 2  |
| 0  | 2  |
| 0  | 2  |
| 0  | 0  |
| 0  | 0  |
| 0  | 0  |
| 0  | 0  |
| 44 | 52 |
| 39 | 40 |
| 0  | 0  |
| 12 | 24 |
| 20 | 22 |
| 0  | 0  |
| 0  | 0  |
| 14 | 10 |
| 0  | 0  |
| 0  | 0  |
| 5  | 7  |
| 0  | 0  |
| 0  | 0  |
| 11 | 0  |
| 0  | 0  |
| 0  | 0  |

[illegible]

[illegible]



[illegible]

[illegible]

[illegible]

[illegible]

|     |      |
|-----|------|
| 0   | 0    |
| 0   | 0    |
| 0   | 0    |
| 2   | 0    |
| 0   | 2    |
| 0   | 2    |
| 0   | 0    |
| 0   | 0    |
| 0   | 0    |
| 0   | 0    |
| 0   | 0    |
| 0   | 0    |
| 0   | 0    |
| 0   | 0    |
| 0   | 0    |
| 0   | 0    |
| 0   | 0    |
| 0   | 0    |
| 0   | 0    |
| 0   | 0    |
| 0   | 0    |
| 0   | 0    |
| 0   | 0    |
| 0   | 0    |
| 0   | 0    |
| 0   | 0    |
| 0   | 0    |
| 921 | 1110 |
| 69  | 43   |
| 0   | 0    |
| 0   | 0    |
| 0   | 0    |
| 93  | 146  |
| 72  | 129  |
| 60  | 0    |
| 0   | 0    |
| 0   | 0    |
| 28  | 26   |
| 0   | 0    |
| 23  | 43   |
| 0   | 0    |
| 21  | 41   |
| 0   | 0    |
| 0   | 0    |
| 0   | 0    |
| 0   | 0    |
| 0   | 0    |
| 0   | 0    |
| 0   | 0    |
| 0   | 0    |
| 14  | 0    |
| 0   | 0    |
| 0   | 0    |
| 0   | 0    |



[illegible]

[illegible]



[illegible]

[illegible]

[illegible]

[illegible]

[illegible]

[illegible]

[illegible]





[illegible]

[illegible]

[illegible]

[illegible]

[illegible]

[illegible]

[illegible]

[illegible]



[illegible]

[illegible]

[illegible]

[illegible]

[illegible]

[illegible]

[illegible]

[illegible]



[illegible]

[illegible]

[illegible]

[illegible]

[illegible]

[illegible]

|   |   |
|---|---|
| 0 | 0 |
| 0 | 0 |
| 0 | 0 |
| 0 | 0 |
| 0 | 0 |
| 0 | 0 |
| 0 | 0 |
| 0 | 0 |
| 0 | 0 |
| 0 | 0 |
| 0 | 0 |
| 0 | 0 |
| 0 | 0 |
| 0 | 0 |
| 0 | 0 |
| 0 | 0 |
| 0 | 0 |
| 0 | 0 |
| 0 | 0 |
| 0 | 0 |
| 0 | 2 |
| 0 | 2 |
| 0 | 2 |
| 0 | 0 |
